# Supplementary material for: Transition structures for the oxy–ene reaction
Source: Royal Society of Chemistry journal article supplement (doi:10.1039/d2cc00687a), 2022-01-01
Supplement: d2cc00687a1.pdf [file d2cc00687a1.pdf]

## SUPPORTING INFORMATION

### Transition Structures for the Oxy-Ene Reaction

Shengwen Yang,<sup>[a,b]</sup> Solène Miaskiewicz,<sup>[a]</sup> Christophe Bour,<sup>[a]</sup> Aurélien Alix<sup>[a]</sup> and Vincent Gandon<sup>\*[a,b]</sup>

<sup>[a]</sup> Institut de Chimie Moléculaire et des Matériaux d'Orsay, CNRS UMR 8182, Université Paris-Saclay 91405 Orsay cedex, France

<sup>[b]</sup> Laboratoire de Chimie Moléculaire (LCM), CNRS UMR 9168 Ecole Polytechnique, Institut Polytechnique de Paris route de Saclay, 91128 Palaiseau cedex, France

\* E-mail: [vincent.gandon@universite-paris-saclay.fr](mailto:vincent.gandon@universite-paris-saclay.fr)

| <b>Table of Contents</b>                                                           | <b>Page</b> |
|------------------------------------------------------------------------------------|-------------|
| Theoretical details                                                                | S2          |
| Additional computations                                                            | S2          |
| Energies and Cartesian coordinates for all the intermediates and transition states | S4          |

## Theoretical details

At the beginning of this study, we tested the computational methods used by Fernández and Bickelhaupt,<sup>1</sup> as well as that used by Zhou, Houk, Tang and co-workers<sup>2</sup> in their respective theoretical analysis of the Alder-ene reaction. A slightly better agreement between the calculated and the experimentally determined  $\Delta G^\ddagger$  reported by Klärner was obtained with the latter (calcd 39.5/40.6 kcal/mol respectively; exp 43.5 kcal/mol).<sup>3</sup> Thus, the geometry optimizations and frequency calculations were carried out at the  $\omega$ B97XD/6-311+G(d,p)<sup>5</sup> level of theory. Single point calculations were then performed at the  $\omega$ B97XD/def2-QZVPP<sup>6</sup> level. The relevance of this level of theory to study pericyclic reactions has been previously justified.<sup>2</sup> For some computations, solvation correction via PCM computations<sup>7</sup> were obtained at the  $\omega$ B97XD/def2-QZVPP level.

*Why were solvent effects or counterions not always taken into account:* it is normal when studying a reaction with parent compounds (Figure 1) to work in the gas phase to analyze the intrinsic features of a mechanism. For instance, no solvation model was used in the study of the Alder-ene reaction<sup>1</sup> and naked anions were used in the study of the oxy-Cope rearrangement.<sup>8</sup> Besides, Klärner's reactions (Scheme 3) were experimentally performed in the gas phase.<sup>3</sup> Borschberg's reactions were performed in benzene (Scheme 3).<sup>9</sup> No strong solvation effect is expected with such a solvent, as confirmed by PCM computations (see Figure S1). The reaction of **1** to give aristone has not been performed experimentally (Scheme 2). The counterion is not known.

## Additional computations

Intramolecular reactions corresponding to Klärner's and Borschberg's substrates were studied. The cyclization of **E** requires 40.6 kcal/mol of free energy of activation and is exergonic by 2.2 kcal/mol. The high field NICS(0) value of -22.6 ppm for **TS<sub>EF</sub>** is again consistent with a pericyclic reaction (Table S1). Klärner hypothesized that "metalation of the hydroxy group could lead to the thermolysis already taking place at considerably lower temperatures". The barrier of 23.3 kcal/mol to reach **TS<sub>GH</sub>** is indeed in line with this suggestion. The same lowering of the cyclization barrier was computed with Borschberg's substrate **I**, from 38.3 kcal/mol in the neutral series to 17.5 kcal/mol in the anionic one. It may seem surprising that no strong acceleration was observed when using lithium or potassium salts of the allyl alkoxide **8** (Scheme 3) but these low computed barriers only reflect the gas phase and it is known that the nature of the metal and that of the solvent strongly influence the rate of the oxy-Cope reaction.<sup>10</sup> Metalation is not a guaranty of success, the proper conditions still remain to be found. Since benzene was used as solvent, the dissociation of the OLi bond must be difficult. We computed the oxy-ene reaction with the corresponding lithium alkoxyde and found indeed that the barrier was actually 29.5 kcal/mol (**TS<sub>K'L</sub>**). It is likely that the use of

THF or DMSO,<sup>11</sup> more commonly used in oxy-Cope rearrangements, could facilitate this reaction. In each series, the NICS(0) value is lower for the anionic or metallated transition states than for the neutral ones (Table S1), which means that their ionic character is increased.

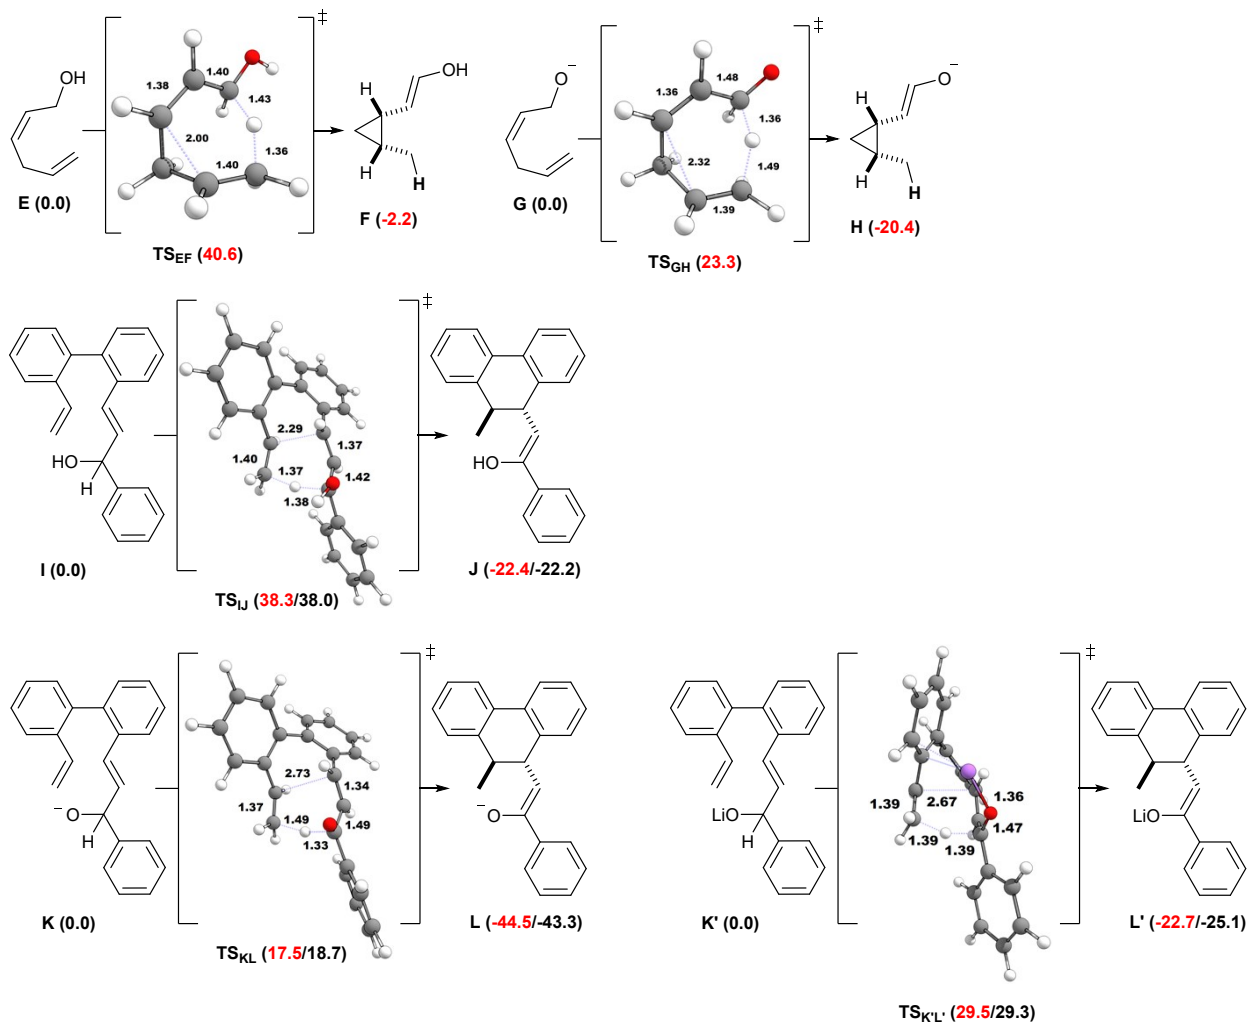

**Figure S1.** Free energies at 536.45 K (E to H) and 483.15 K (I to L') ( $\Delta G$  kcal/mol) and transition state geometries (selected distances in Å) of the neutral and anionic oxy-ene reactions corresponding to Scheme 3 computed at the  $\omega$ B97XD/def2-QZVPP// $\omega$ B97XD/6-311+G(d,p) level. Values in red are in the gas phase, values in black include solvation correction from PCM calculations (benzene).

**Table S1. NICS(0) values of the transition states (ppm)**

| TS | NICS(0) |
|----|---------|
|----|---------|

|             |       |
|-------------|-------|
| $TS_{EF}$   | -22.6 |
| $TS_{IJ}$   | -17.8 |
| $TS_{KL}$   | -8.5  |
| $TS_{K'L'}$ | -12.6 |

## Energies and Cartesian coordinates for all the intermediates and transition states

### ethene

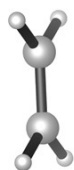

Zero-point correction= 0.051185 (Hartree/Particle)

Thermal correction to Energy= 0.057211

Thermal correction to Enthalpy= 0.058741

Thermal correction to Gibbs Free Energy= 0.011914

Sum of electronic and zero-point Energies= -78.529499

Sum of electronic and thermal Energies= -78.523473

Sum of electronic and thermal Enthalpies= -78.521943

Sum of electronic and thermal Free Energies= -78.568770

E(RwB97XD) = -78.5955614070

|   |                 |                 |                 |
|---|-----------------|-----------------|-----------------|
| C | 0.662828000000  | 0.000028000000  | -0.000072000000 |
| H | 1.232089000000  | 0.923818000000  | 0.000252000000  |
| H | 1.231827000000  | -0.923918000000 | 0.000316000000  |
| C | -0.662831000000 | 0.000029000000  | -0.000170000000 |
| H | -1.231727000000 | -0.923943000000 | 0.000410000000  |
| H | -1.232172000000 | 0.923703000000  | 0.000475000000  |

-----

### allyl alcohol *s-cis*

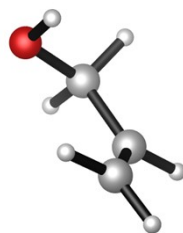

Zero-point correction= 0.085802 (Hartree/Particle)

Thermal correction to Energy= 0.096630

Thermal correction to Enthalpy= 0.098160

Thermal correction to Gibbs Free Energy= 0.037031

Sum of electronic and zero-point Energies= -193.026369

Sum of electronic and thermal Energies= -193.015540

Sum of electronic and thermal Enthalpies= -193.014010

Sum of electronic and thermal Free Energies= -193.075139

E(RwB97XD) = -193.147447326

|   |                 |                 |                 |
|---|-----------------|-----------------|-----------------|
| H | -1.110861000000 | 1.240324000000  | 0.800848000000  |
| C | -0.732462000000 | 0.628851000000  | -0.031803000000 |
| C | 0.767928000000  | 0.585322000000  | 0.039296000000  |
| O | -1.358082000000 | -0.633376000000 | -0.057837000000 |
| C | 1.506658000000  | -0.514573000000 | -0.032754000000 |
| H | 1.055907000000  | -1.491214000000 | -0.176136000000 |
| H | 1.248507000000  | 1.554268000000  | 0.161851000000  |
| H | -1.131806000000 | -1.099044000000 | 0.749293000000  |
| H | 2.587549000000  | -0.470358000000 | 0.031018000000  |
| H | -1.037388000000 | 1.135434000000  | -0.952611000000 |

-----

A

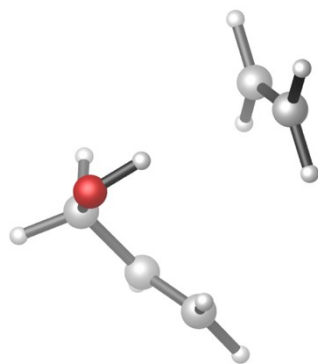

Zero-point correction= 0.138503 (Hartree/Particle)

Thermal correction to Energy= 0.158493

Thermal correction to Enthalpy= 0.160023

Thermal correction to Gibbs Free Energy= 0.072463

Sum of electronic and zero-point Energies= -271.561296

Sum of electronic and thermal Energies= -271.541305

Sum of electronic and thermal Enthalpies= -271.539775

Sum of electronic and thermal Free Energies= -271.627335

E(RwB97XD) = -271.749478503

C 2.385481000000 0.391073000000 -0.421287000000

H -0.743393000000 -1.302505000000 1.229372000000

H 1.847074000000 1.236530000000 -0.837989000000

C -1.280862000000 -0.919837000000 0.347725000000

C -1.514257000000 0.555149000000 0.526169000000

O -0.618442000000 -1.272045000000 -0.841050000000

H 3.169515000000 -0.044776000000 -1.031994000000

C -1.216032000000 1.489475000000 -0.367380000000

C 2.099612000000 -0.077516000000 0.787316000000

H 2.636976000000 -0.917772000000 1.214944000000

H -0.784536000000 1.226812000000 -1.327615000000

H -1.967868000000 0.836468000000 1.475416000000

H 0.289932000000 -0.961967000000 -0.775102000000

H -1.414123000000 2.537483000000 -0.174477000000

H 1.316800000000 0.371347000000 1.391063000000

H -2.246494000000 -1.435325000000 0.329526000000

-----

TS<sub>AB</sub>

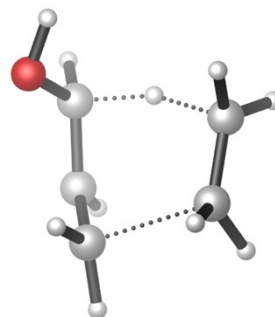

Frequency 122.3394

Zero-point correction= 0.136621 (Hartree/Particle)

Thermal correction to Energy= 0.153366

Thermal correction to Enthalpy= 0.154896

Thermal correction to Gibbs Free Energy= 0.080443

Sum of electronic and zero-point Energies= -271.505121

Sum of electronic and thermal Energies= -271.488376

Sum of electronic and thermal Enthalpies= -271.486846

Sum of electronic and thermal Free Energies= -271.561299

E(RwB97XD) = -271.690374961

C 1.294394000000 -1.234527000000 0.270166000000

H -0.059761000000 -0.883061000000 0.664825000000

H 1.095810000000 -2.043768000000 -0.427576000000

C -1.195554000000 -0.224630000000 0.544740000000

C -0.591381000000 1.046536000000 0.602207000000

O -1.647241000000 -0.628074000000 -0.716942000000

H 1.585363000000 -1.551188000000 1.268836000000

C 0.241816000000 1.445646000000 -0.416855000000

C 1.808151000000 -0.036279000000 -0.228219000000

H 2.430351000000 0.578014000000 0.411574000000

H 0.007711000000 1.137058000000 -1.428003000000

H -0.488325000000 1.488255000000 1.589357000000

H -1.707592000000 -1.583802000000 -0.732417000000

H 0.80330600000 2.36892800000 -0.32383100000  
 H 2.01771600000 0.05111000000 -1.28685800000  
 H -1.85120800000 -0.51743300000 1.36739600000

-----

**B**

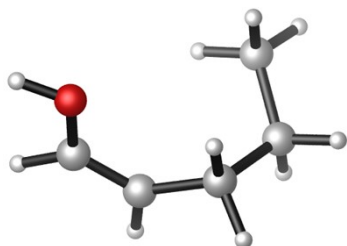

Zero-point correction= 0.142926 (Hartree/Particle)  
 Thermal correction to Energy= 0.160360  
 Thermal correction to Enthalpy= 0.161890  
 Thermal correction to Gibbs Free Energy= 0.083083  
 Sum of electronic and zero-point Energies= -271.603604  
 Sum of electronic and thermal Energies= -271.586170  
 Sum of electronic and thermal Enthalpies= -271.584640  
 Sum of electronic and thermal Free Energies= -271.663447  
 E(RwB97XD) = -271.795656981  
 C 1.73851900000 -1.15073400000 0.29441300000  
 H 0.99935900000 -1.31242700000 1.08382000000  
 H 1.44128200000 -1.76025500000 -0.56428200000  
 C -1.67566500000 0.13796900000 0.47195500000  
 C -0.58858000000 0.90087600000 0.45874600000  
 O -1.94727300000 -0.76666700000 -0.51586300000  
 H 2.70382500000 -1.51795400000 0.65282400000  
 C 0.47663300000 0.88293300000 -0.59789500000  
 C 1.81451000000 0.32425900000 -0.08900200000  
 H 2.14765600000 0.91380700000 0.77360100000  
 H 0.13740200000 0.29074700000 -1.45264700000  
 H -0.46045100000 1.57686000000 1.29892200000  
 H -2.78361500000 -1.19484000000 -0.34037600000

H 0.63433200000 1.90505400000 -0.96056400000  
 H 2.57124600000 0.46303700000 -0.86864800000  
 H -2.40535200000 0.19749100000 1.27495100000

-----

**Alkoxide *s-cis***

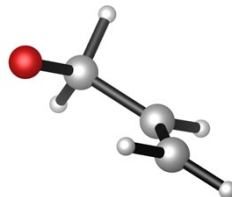

Zero-point correction= 0.069544 (Hartree/Particle)  
 Thermal correction to Energy= 0.079484  
 Thermal correction to Enthalpy= 0.081014  
 Thermal correction to Gibbs Free Energy= 0.021772  
 Sum of electronic and zero-point Energies= -192.431411  
 Sum of electronic and thermal Energies= -192.421471  
 Sum of electronic and thermal Enthalpies= -192.419941  
 Sum of electronic and thermal Free Energies= -192.479183  
 E(RwB97XD) = -192.532638734  
 H -1.10159100000 1.16357600000 0.88170800000  
 C -0.81952100000 0.49923200000 -0.00023800000  
 C 0.70615400000 0.58256400000 0.00015700000  
 O -1.36373400000 -0.70449300000 0.00016000000  
 C 1.50486800000 -0.48384500000 -0.00002200000  
 H 1.04045800000 -1.46703000000 -0.00050400000  
 H 1.13381300000 1.59241300000 0.00021000000  
 H 2.58997800000 -0.40399100000 -0.00005100000  
 H -1.10179200000 1.16327200000 -0.88202100000

-----

**C**

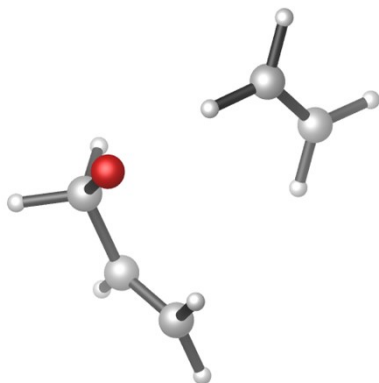

Zero-point correction= 0.122251 (Hartree/Particle)  
 Thermal correction to Energy= 0.141167  
 Thermal correction to Enthalpy= 0.142697  
 Thermal correction to Gibbs Free Energy= 0.057317  
 Sum of electronic and zero-point Energies= -270.973781  
 Sum of electronic and thermal Energies= -270.954865  
 Sum of electronic and thermal Enthalpies= -270.953335  
 Sum of electronic and thermal Free Energies= -271.038716

E(RwB97XD) = -271.142310491

|   |                 |                 |                 |
|---|-----------------|-----------------|-----------------|
| C | 2.260621000000  | -0.452292000000 | -0.110267000000 |
| H | -0.510506000000 | -0.962011000000 | 1.417023000000  |
| H | 1.286273000000  | -0.896113000000 | -0.387030000000 |
| C | -1.160436000000 | -0.904970000000 | 0.488006000000  |
| C | -1.590488000000 | 0.558188000000  | 0.467840000000  |
| O | -0.590990000000 | -1.379122000000 | -0.616484000000 |
| H | 3.149274000000  | -1.084650000000 | -0.118562000000 |
| C | -1.402638000000 | 1.368166000000  | -0.572334000000 |
| C | 2.361216000000  | 0.827141000000  | 0.238367000000  |
| H | 3.307888000000  | 1.286586000000  | 0.520933000000  |
| H | -0.925123000000 | 0.959630000000  | -1.459516000000 |
| H | -2.064696000000 | 0.935557000000  | 1.380682000000  |
| H | -1.706700000000 | 2.412402000000  | -0.562432000000 |
| H | 1.475574000000  | 1.457714000000  | 0.253324000000  |
| H | -2.093710000000 | -1.453535000000 | 0.817779000000  |

-----

## TS<sub>CD</sub>

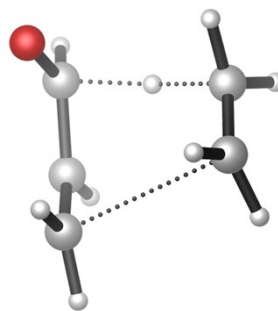

Frequency -967.7102

Zero-point correction= 0.119248 (Hartree/Particle)  
 Thermal correction to Energy= 0.136492  
 Thermal correction to Enthalpy= 0.138022  
 Thermal correction to Gibbs Free Energy= 0.061097  
 Sum of electronic and zero-point Energies= -270.940230  
 Sum of electronic and thermal Energies= -270.922986  
 Sum of electronic and thermal Enthalpies= -270.921456  
 Sum of electronic and thermal Free Energies= -270.998380

E(RwB97XD) = -271.105389419

|   |                 |                 |                 |
|---|-----------------|-----------------|-----------------|
| C | 1.628014000000  | -0.778795000000 | 0.377562000000  |
| H | 0.269069000000  | -0.728801000000 | 0.727364000000  |
| H | 1.481892000000  | -1.717512000000 | -0.159689000000 |
| C | -1.097808000000 | -0.698835000000 | 0.356815000000  |
| C | -1.003950000000 | 0.740009000000  | 0.636260000000  |
| O | -1.228341000000 | -1.184414000000 | -0.811222000000 |
| H | 2.036782000000  | -0.887693000000 | 1.384600000000  |
| C | -0.630239000000 | 1.640760000000  | -0.293501000000 |
| C | 1.998913000000  | 0.335461000000  | -0.359841000000 |
| H | 2.385031000000  | 1.230388000000  | 0.116638000000  |
| H | -0.617314000000 | 1.355692000000  | -1.339046000000 |
| H | -1.013555000000 | 1.017137000000  | 1.692533000000  |
| H | -0.415967000000 | 2.674267000000  | -0.036469000000 |
| H | 1.829335000000  | 0.375970000000  | -1.428751000000 |
| H | -1.498124000000 | -1.275732000000 | 1.228824000000  |

-----  
**D**

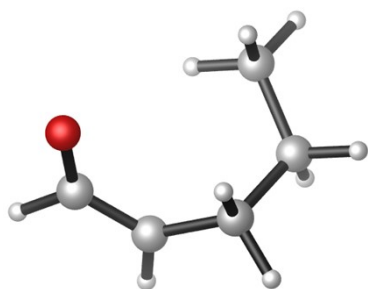

Zero-point correction= 0.128057 (Hartree/Particle)

Thermal correction to Energy= 0.144374

Thermal correction to Enthalpy= 0.145904

Thermal correction to Gibbs Free Energy= 0.070285

Sum of electronic and zero-point Energies= -271.040919

Sum of electronic and thermal Energies= -271.024603

Sum of electronic and thermal Enthalpies= -271.023072

Sum of electronic and thermal Free Energies= -271.098691

E(RwB97XD) = -271.214120556

C 1.548730000000 -1.182638000000 0.259131000000

H 0.697440000000 -1.335671000000 0.927118000000

H 1.312979000000 -1.705397000000 -0.672898000000

C -1.712751000000 0.024022000000 0.320498000000

C -0.711177000000 0.971239000000 0.393994000000

O -1.831692000000 -0.954270000000 -0.473911000000

H 2.442573000000 -1.639660000000 0.702331000000

C 0.466329000000 0.985847000000 -0.538878000000

C 1.741672000000 0.309948000000 0.004549000000

H 2.031151000000 0.804998000000 0.942063000000

H 0.178927000000 0.467853000000 -1.464299000000

H -0.785301000000 1.741523000000 1.160397000000

H 0.727618000000 2.018510000000 -0.819982000000

H 2.573458000000 0.460885000000 -0.702408000000

H -2.522121000000 0.170610000000 1.083199000000

-----  
**E**

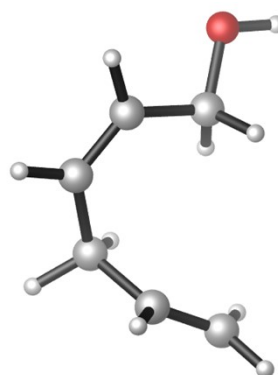

Zero-point correction= 0.147638 (Hartree/Particle)

Thermal correction to Energy= 0.170903

Thermal correction to Enthalpy= 0.172602

Thermal correction to Gibbs Free Energy= 0.074386

Sum of electronic and zero-point Energies= -309.661532

Sum of electronic and thermal Energies= -309.638266

Sum of electronic and thermal Enthalpies= -309.636567

Sum of electronic and thermal Free Energies= -309.734783

E(RwB97XD) = -309.864309802

C -2.179299000000 1.426225000000 -0.077307000000

H 1.071513000000 1.182448000000 -0.880361000000

H -2.714801000000 2.059885000000 -0.775415000000

C 1.387195000000 0.543479000000 -0.042278000000

C 1.042803000000 -0.878554000000 -0.355333000000

O 2.790925000000 0.624449000000 0.151119000000

H -1.779618000000 1.901455000000 0.814634000000

C -0.113009000000 -1.476923000000 -0.079683000000

C -2.022929000000 0.126494000000 -0.297947000000

H -0.244843000000 -2.507587000000 -0.396877000000

H 3.037861000000 1.545606000000 0.231210000000

H 0.847218000000 0.889494000000 0.848963000000

C -1.284201000000 -0.817942000000 0.613313000000



H -0.94617600000 -0.27215500000 1.50120200000  
H -1.97496300000 -1.59144900000 0.96357900000  
H -2.43114900000 -0.31285100000 -1.20631700000  
H 1.82419800000 -1.42711800000 -0.87416700000

-----

**TS<sub>EF</sub>**

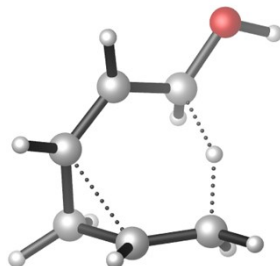

Frequency -1340.4222

Zero-point correction= 0.143743 (Hartree/Particle)  
Thermal correction to Energy= 0.164910  
Thermal correction to Enthalpy= 0.166609  
Thermal correction to Gibbs Free Energy= 0.078576  
Sum of electronic and zero-point Energies= -309.604954  
Sum of electronic and thermal Energies= -309.583787  
Sum of electronic and thermal Enthalpies= -309.582088  
Sum of electronic and thermal Free Energies= -309.670121

E(RwB97XD) = -309.803809588

C -0.78832600000 1.63953000000 -0.19586700000  
H 0.44122800000 1.05619000000 -0.18003700000  
H -0.78901800000 2.37612200000 -0.99557700000  
C 1.29477500000 0.01616400000 0.30935800000  
C 0.61128000000 -1.02437200000 -0.33180200000  
O 2.64340600000 0.13747400000 -0.00612000000  
H -0.69687100000 2.07420100000 0.80092200000  
C -0.74786300000 -1.23373000000 -0.22282200000  
C -1.66018700000 0.54890800000 -0.32930800000  
H -1.20029000000 -1.93692800000 -0.91373300000

H 2.96585900000 0.97490800000 0.32529000000  
H 1.05974000000 0.23795400000 1.35372500000  
C -1.69310800000 -0.52969700000 0.69523300000  
H -1.27738400000 -0.22972400000 1.65910200000  
H -2.64347600000 -1.04303000000 0.82604500000  
H -2.24363100000 0.40592300000 -1.23030500000  
H 1.13716700000 -1.51622600000 -1.14523400000

-----

**F**

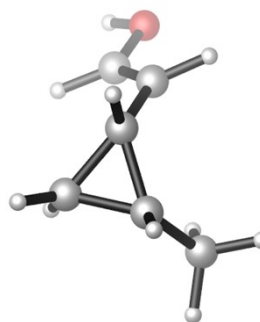

Zero-point correction= 0.148170 (Hartree/Particle)  
Thermal correction to Energy= 0.170980  
Thermal correction to Enthalpy= 0.172678  
Thermal correction to Gibbs Free Energy= 0.078398  
Sum of electronic and zero-point Energies= -309.665430  
Sum of electronic and thermal Energies= -309.642621  
Sum of electronic and thermal Enthalpies= -309.640922  
Sum of electronic and thermal Free Energies= -309.735202

E(RwB97XD) = -309.869812390

C -1.77751500000 1.42768900000 0.21937400000  
H -0.83778700000 1.65884600000 0.72705200000  
H -1.85733400000 2.08952600000 -0.64814900000  
C 1.69674800000 -0.19859900000 0.21464200000  
C 0.74355000000 -0.08009000000 -0.70089600000  
O 2.89753100000 0.43953400000 0.09674100000  
H -2.59906800000 1.66397200000 0.90180700000  
C -0.57424400000 -0.75993100000 -0.62311600000

|   |                 |                 |                 |
|---|-----------------|-----------------|-----------------|
| C | -1.827134000000 | -0.021288000000 | -0.197121000000 |
| H | -0.737846000000 | -1.489865000000 | -1.412075000000 |
| H | 3.450430000000  | 0.228665000000  | 0.847549000000  |
| H | 1.565515000000  | -0.811395000000 | 1.103419000000  |
| C | -1.239611000000 | -1.085600000000 | 0.691821000000  |
| H | -0.757777000000 | -0.745892000000 | 1.602575000000  |
| H | -1.752767000000 | -2.035165000000 | 0.785814000000  |
| H | -2.726324000000 | -0.304670000000 | -0.735965000000 |
| H | 0.941952000000  | 0.536616000000  | -1.574171000000 |

-----

### G

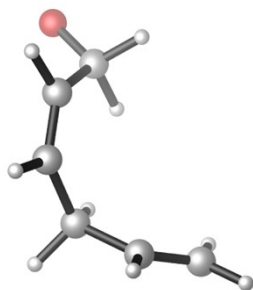

|                                              |                             |
|----------------------------------------------|-----------------------------|
| Zero-point correction=                       | 0.132024 (Hartree/Particle) |
| Thermal correction to Energy=                | 0.154151                    |
| Thermal correction to Enthalpy=              | 0.155850                    |
| Thermal correction to Gibbs Free Energy=     | 0.058915                    |
| Sum of electronic and zero-point Energies=   | -309.065982                 |
| Sum of electronic and thermal Energies=      | -309.043855                 |
| Sum of electronic and thermal Enthalpies=    | -309.042156                 |
| Sum of electronic and thermal Free Energies= | -309.139091                 |
| E(RwB97XD) =                                 | -309.249641153              |

|   |                 |                 |                 |
|---|-----------------|-----------------|-----------------|
| C | -2.642620000000 | 1.134265000000  | -0.183379000000 |
| H | 1.711394000000  | 1.219797000000  | -1.195970000000 |
| H | -3.478728000000 | 1.410051000000  | -0.818913000000 |
| C | 1.749713000000  | 0.681825000000  | -0.196587000000 |
| C | 1.171766000000  | -0.695573000000 | -0.502081000000 |
| O | 2.965471000000  | 0.601881000000  | 0.354910000000  |

|   |                 |                 |                 |
|---|-----------------|-----------------|-----------------|
| H | -2.146576000000 | 1.932572000000  | 0.361769000000  |
| C | 0.024226000000  | -1.258833000000 | -0.108081000000 |
| C | -2.212662000000 | -0.120880000000 | -0.099545000000 |
| H | -0.184484000000 | -2.293764000000 | -0.387163000000 |
| H | 0.986218000000  | 1.245105000000  | 0.412033000000  |
| C | -1.045127000000 | -0.587908000000 | 0.724163000000  |
| H | -0.619931000000 | 0.260140000000  | 1.266532000000  |
| H | -1.417566000000 | -1.303049000000 | 1.472193000000  |
| H | -2.715857000000 | -0.889417000000 | -0.688084000000 |
| H | 1.869990000000  | -1.313866000000 | -1.068617000000 |

-----

### TS<sub>GH</sub>

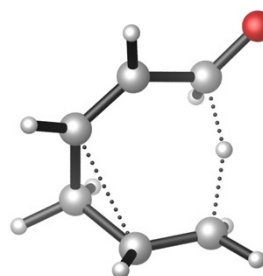

|                                              |                             |
|----------------------------------------------|-----------------------------|
| Frequency                                    | -1139.9197                  |
| Zero-point correction=                       | 0.128638 (Hartree/Particle) |
| Thermal correction to Energy=                | 0.148771                    |
| Thermal correction to Enthalpy=              | 0.150470                    |
| Thermal correction to Gibbs Free Energy=     | 0.064201                    |
| Sum of electronic and zero-point Energies=   | -309.037948                 |
| Sum of electronic and thermal Energies=      | -309.017815                 |
| Sum of electronic and thermal Enthalpies=    | -309.016116                 |
| Sum of electronic and thermal Free Energies= | -309.102385                 |
| E(RwB97XD) =                                 | -309.217718841              |

|   |                 |                 |                 |
|---|-----------------|-----------------|-----------------|
| C | -0.812158000000 | 1.637076000000  | -0.151921000000 |
| H | 0.528334000000  | 1.003885000000  | -0.244460000000 |
| H | -0.762803000000 | 2.429029000000  | -0.898215000000 |
| C | 1.419659000000  | 0.115066000000  | 0.279905000000  |
| C | 0.721678000000  | -1.051440000000 | -0.297603000000 |

|   |                 |                 |                 |
|---|-----------------|-----------------|-----------------|
| O | 2.653128000000  | 0.351235000000  | 0.008879000000  |
| H | -0.568506000000 | 1.964480000000  | 0.862014000000  |
| C | -0.589583000000 | -1.379191000000 | -0.164119000000 |
| C | -1.755454000000 | 0.632758000000  | -0.302234000000 |
| H | -0.972967000000 | -2.187828000000 | -0.788643000000 |
| H | 1.060124000000  | 0.337982000000  | 1.319116000000  |
| C | -1.618759000000 | -0.583597000000 | 0.585958000000  |
| H | -1.268901000000 | -0.288207000000 | 1.584799000000  |
| H | -2.552885000000 | -1.144850000000 | 0.699220000000  |
| H | -2.198668000000 | 0.457330000000  | -1.281283000000 |
| H | 1.318953000000  | -1.605725000000 | -1.023492000000 |

-----

## H

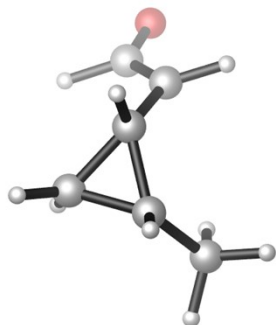

|                                              |                             |                 |                 |
|----------------------------------------------|-----------------------------|-----------------|-----------------|
| Zero-point correction=                       | 0.133327 (Hartree/Particle) |                 |                 |
| Thermal correction to Energy=                | 0.154849                    |                 |                 |
| Thermal correction to Enthalpy=              | 0.156548                    |                 |                 |
| Thermal correction to Gibbs Free Energy=     | 0.065032                    |                 |                 |
| Sum of electronic and zero-point Energies=   | -309.102934                 |                 |                 |
| Sum of electronic and thermal Energies=      | -309.081411                 |                 |                 |
| Sum of electronic and thermal Enthalpies=    | -309.079713                 |                 |                 |
| Sum of electronic and thermal Free Energies= | -309.171229                 |                 |                 |
| E(RwB97XD) =                                 | -309.288332385              |                 |                 |
| C                                            | -1.858751000000             | 1.345815000000  | 0.263415000000  |
| H                                            | -0.883930000000             | 1.646732000000  | 0.656769000000  |
| H                                            | -2.097688000000             | 2.018915000000  | -0.568752000000 |
| C                                            | 1.856785000000              | -0.130939000000 | 0.187722000000  |

|   |                 |                 |                 |
|---|-----------------|-----------------|-----------------|
| C | 0.802143000000  | 0.073690000000  | -0.680373000000 |
| O | 2.986491000000  | 0.431245000000  | 0.234343000000  |
| H | -2.617040000000 | 1.486723000000  | 1.043905000000  |
| C | -0.465818000000 | -0.699218000000 | -0.651613000000 |
| C | -1.793042000000 | -0.087115000000 | -0.200946000000 |
| H | -0.621475000000 | -1.433433000000 | -1.449247000000 |
| H | 1.648704000000  | -0.919206000000 | 0.959772000000  |
| C | -1.107053000000 | -1.124042000000 | 0.651575000000  |
| H | -0.631254000000 | -0.774781000000 | 1.561608000000  |
| H | -1.546657000000 | -2.114657000000 | 0.724891000000  |
| H | -2.673243000000 | -0.432394000000 | -0.740933000000 |
| H | 0.925074000000  | 0.802995000000  | -1.481439000000 |

-----

## I

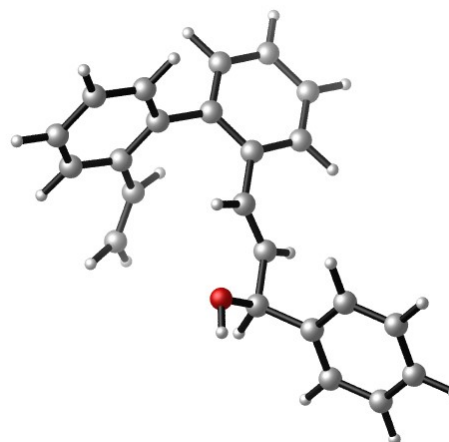

|                                              |                             |
|----------------------------------------------|-----------------------------|
| Zero-point correction=                       | 0.363688 (Hartree/Particle) |
| Thermal correction to Energy=                | 0.415306                    |
| Thermal correction to Enthalpy=              | 0.416837                    |
| Thermal correction to Gibbs Free Energy=     | 0.257340                    |
| Sum of electronic and zero-point Energies=   | -963.227580                 |
| Sum of electronic and thermal Energies=      | -963.175961                 |
| Sum of electronic and thermal Enthalpies=    | -963.174431                 |
| Sum of electronic and thermal Free Energies= | -963.333928                 |
| E(RwB97XD) =                                 | -963.756278032              |

C 1.695360000000 -1.884590000000 2.618186000000  
H -2.225181000000 -1.488571000000 1.506614000000  
H 1.575229000000 -2.903866000000 2.265002000000  
C -2.126720000000 -1.023882000000 0.513189000000  
C -3.506317000000 -0.552467000000 0.080655000000  
C -1.183348000000 0.136500000000 0.643003000000  
O -1.586284000000 -1.963106000000 -0.399760000000  
C -3.672317000000 0.062371000000 -1.161380000000  
C -4.927646000000 0.485933000000 -1.571883000000  
H -2.806350000000 0.205766000000 -1.799179000000  
C -6.031991000000 0.308354000000 -0.741513000000  
H -5.047672000000 0.961562000000 -2.538952000000  
H 1.313180000000 -1.657904000000 3.606736000000  
C -4.613656000000 -0.729925000000 0.903487000000  
C -0.055886000000 0.271504000000 -0.048527000000  
C 0.863978000000 1.417406000000 0.071401000000  
C 2.247320000000 1.240909000000 -0.111064000000  
C 2.828587000000 -0.097528000000 -0.419079000000  
C 3.100084000000 2.340705000000 -0.012819000000  
H 4.165671000000 2.189657000000 -0.150096000000  
C 3.391322000000 -0.308941000000 -1.678135000000  
H 3.383964000000 0.503870000000 -2.396683000000  
C 3.935725000000 -1.537742000000 -2.023590000000  
H 4.364266000000 -1.684086000000 -3.008629000000  
C 0.382958000000 2.702439000000 0.341999000000  
C 1.241276000000 3.786230000000 0.450514000000  
H 0.842082000000 4.772704000000 0.658465000000  
H -0.686565000000 2.854064000000 0.439868000000  
C 2.821046000000 -1.143578000000 0.520732000000  
C 3.385865000000 -2.371027000000 0.161057000000  
H 3.420150000000 -3.169440000000 0.893967000000  
C 2.258624000000 -0.939323000000 1.870203000000  
H 2.300552000000 0.077131000000 2.252622000000

C 3.930504000000 -2.573929000000 -1.097483000000  
H 4.363612000000 -3.535253000000 -1.350210000000  
C 2.607900000000 3.606963000000 0.271984000000  
H 3.286641000000 4.448869000000 0.348536000000  
H 0.233399000000 -0.528382000000 -0.722630000000  
H -1.486741000000 0.883655000000 1.372563000000  
C -5.873593000000 -0.298359000000 0.496916000000  
H -7.012192000000 0.643355000000 -1.061772000000  
H -6.729484000000 -0.440523000000 1.147253000000  
H -4.492471000000 -1.209155000000 1.870503000000  
H -2.266258000000 -2.606728000000 -0.603012000000

-----

### TS<sub>1J</sub>

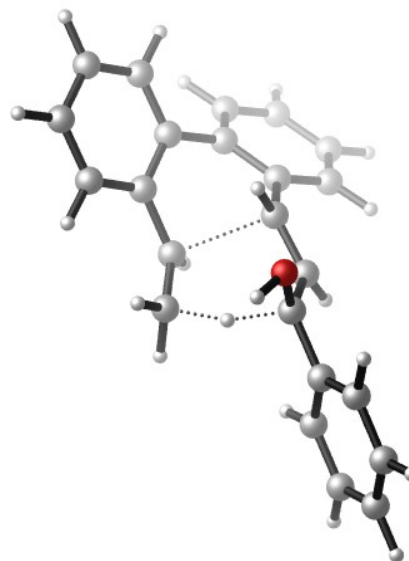

Frequency -1222.2228

Zero-point correction= 0.360604 (Hartree/Particle)  
Thermal correction to Energy= 0.409693  
Thermal correction to Enthalpy= 0.411223  
Thermal correction to Gibbs Free Energy= 0.264987  
Sum of electronic and zero-point Energies= -963.177754  
Sum of electronic and thermal Energies= -963.128665  
Sum of electronic and thermal Enthalpies= -963.127135

Sum of electronic and thermal Free Energies= -963.273371

E(RwB97XD) = -963.702873943

|   |                 |                 |                 |
|---|-----------------|-----------------|-----------------|
| C | -0.462241000000 | -1.580541000000 | 1.363314000000  |
| H | -1.373440000000 | -1.003217000000 | 0.524814000000  |
| H | -0.482703000000 | -2.620256000000 | 1.043518000000  |
| C | -1.927506000000 | -0.333473000000 | -0.548243000000 |
| C | -3.369015000000 | -0.123909000000 | -0.218908000000 |
| C | -1.007793000000 | 0.735975000000  | -0.433437000000 |
| O | -1.661207000000 | -1.223012000000 | -1.590063000000 |
| C | -4.377016000000 | -0.488242000000 | -1.111293000000 |
| C | -5.713588000000 | -0.291653000000 | -0.782585000000 |
| H | -4.109313000000 | -0.904216000000 | -2.075853000000 |
| C | -6.060851000000 | 0.268195000000  | 0.440527000000  |
| H | -6.486394000000 | -0.571426000000 | -1.490028000000 |
| H | -1.037178000000 | -1.383955000000 | 2.266415000000  |
| C | -3.727260000000 | 0.427867000000  | 1.013950000000  |
| C | 0.325563000000  | 0.506691000000  | -0.645408000000 |
| C | 1.401216000000  | 1.478849000000  | -0.368947000000 |
| C | 2.668301000000  | 0.989873000000  | 0.005215000000  |
| C | 2.920178000000  | -0.475135000000 | 0.044362000000  |
| C | 3.676599000000  | 1.894354000000  | 0.329445000000  |
| H | 4.641901000000  | 1.518147000000  | 0.651171000000  |
| C | 4.100644000000  | -0.986080000000 | -0.489618000000 |
| H | 4.817998000000  | -0.302207000000 | -0.930450000000 |
| C | 4.359708000000  | -2.351743000000 | -0.494607000000 |
| H | 5.284425000000  | -2.726926000000 | -0.917885000000 |
| C | 1.196677000000  | 2.854656000000  | -0.440484000000 |
| C | 2.215566000000  | 3.746594000000  | -0.124300000000 |
| H | 2.037215000000  | 4.814246000000  | -0.186717000000 |
| H | 0.232315000000  | 3.229487000000  | -0.765872000000 |
| C | 1.961374000000  | -1.363140000000 | 0.579972000000  |
| C | 2.241147000000  | -2.729729000000 | 0.574047000000  |
| H | 1.532412000000  | -3.418746000000 | 1.018445000000  |

|   |                 |                 |                 |
|---|-----------------|-----------------|-----------------|
| C | 0.706967000000  | -0.837024000000 | 1.166600000000  |
| H | 0.833396000000  | 0.054881000000  | 1.772626000000  |
| C | 3.424537000000  | -3.225198000000 | 0.039610000000  |
| H | 3.614592000000  | -4.292636000000 | 0.049242000000  |
| C | 3.457071000000  | 3.266084000000  | 0.266719000000  |
| H | 4.254839000000  | 3.953788000000  | 0.523388000000  |
| H | 0.588013000000  | -0.332579000000 | -1.279912000000 |
| H | -1.327197000000 | 1.599726000000  | 0.142879000000  |
| C | -5.061126000000 | 0.629012000000  | 1.338546000000  |
| H | -7.103494000000 | 0.420104000000  | 0.695335000000  |
| H | -5.322702000000 | 1.058929000000  | 2.299038000000  |
| H | -2.952624000000 | 0.691635000000  | 1.727430000000  |
| H | -2.047310000000 | -2.074379000000 | -1.373942000000 |

-----

## J

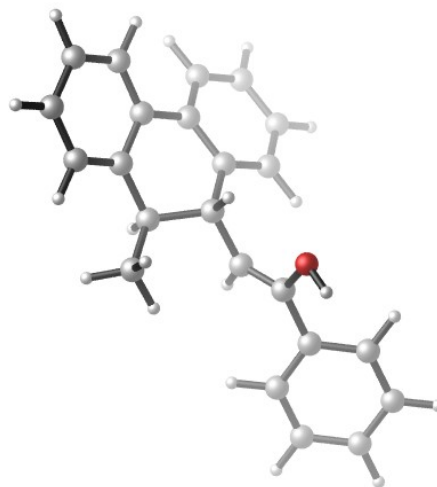

|                                            |                             |
|--------------------------------------------|-----------------------------|
| Zero-point correction=                     | 0.367170 (Hartree/Particle) |
| Thermal correction to Energy=              | 0.416667                    |
| Thermal correction to Enthalpy=            | 0.418197                    |
| Thermal correction to Gibbs Free Energy=   | 0.267912                    |
| Sum of electronic and zero-point Energies= | -963.270332                 |
| Sum of electronic and thermal Energies=    | -963.220834                 |
| Sum of electronic and thermal Enthalpies=  | -963.219304                 |

Sum of electronic and thermal Free Energies= -963.369589

E(RwB97XD) = -963.802566326

|   |                |                |                |
|---|----------------|----------------|----------------|
| C | 0.43510000000  | -2.59577800000 | 0.63267200000  |
| H | -0.61218500000 | -2.51611800000 | 0.92845500000  |
| H | 0.46492100000  | -2.99632700000 | -0.38553400000 |
| C | -2.10550700000 | -0.27700900000 | -0.63728800000 |
| C | -3.53451000000 | -0.25930800000 | -0.24362500000 |
| C | -1.09793900000 | -0.12802300000 | 0.22321800000  |
| O | -1.84774200000 | -0.39917200000 | -1.97726400000 |
| C | -4.47989000000 | 0.38424200000  | -1.04784700000 |
| C | -5.81914700000 | 0.41153900000  | -0.67990100000 |
| H | -4.16086900000 | 0.89424300000  | -1.95106400000 |
| C | -6.23371200000 | -0.20561000000 | 0.49418200000  |
| H | -6.53879000000 | 0.92433600000  | -1.30805400000 |
| H | 0.91253100000  | -3.31615500000 | 1.30064000000  |
| C | -3.96338300000 | -0.88524600000 | 0.92910500000  |
| C | 0.35728800000  | -0.16662800000 | -0.13317400000 |
| C | 1.02987500000  | 1.18522700000  | 0.05581200000  |
| C | 2.42905000000  | 1.23447300000  | 0.15523400000  |
| C | 3.20097700000  | -0.01928100000 | 0.00679900000  |
| C | 3.05307300000  | 2.46367500000  | 0.37808400000  |
| H | 4.12897000000  | 2.50544200000  | 0.50443400000  |
| C | 4.53083900000  | -0.01161000000 | -0.41725500000 |
| H | 5.00835000000  | 0.92820400000  | -0.66967400000 |
| C | 5.24748900000  | -1.19199900000 | -0.54968800000 |
| H | 6.27870800000  | -1.16547100000 | -0.88331700000 |
| C | 0.30095800000  | 2.36860200000  | 0.12780700000  |
| C | 0.93418300000  | 3.58955000000  | 0.32413400000  |
| H | 0.34769900000  | 4.49978100000  | 0.38152700000  |
| H | -0.77826700000 | 2.33020700000  | 0.03094600000  |
| C | 2.56880300000  | -1.24595700000 | 0.27362400000  |
| C | 3.30012900000  | -2.42290200000 | 0.13401400000  |
| H | 2.83169200000  | -3.37860000000 | 0.33328700000  |

|   |                |                |                |
|---|----------------|----------------|----------------|
| C | 1.11213800000  | -1.22970900000 | 0.70327500000  |
| H | 1.08251500000  | -0.88761800000 | 1.74933900000  |
| C | 4.63052500000  | -2.40248500000 | -0.26825000000 |
| H | 5.17670200000  | -3.33331400000 | -0.37297800000 |
| C | 2.31519000000  | 3.63545900000  | 0.46172500000  |
| H | 2.81771500000  | 4.57978900000  | 0.63857800000  |
| H | 0.44984600000  | -0.44986400000 | -1.18933400000 |
| H | -1.35017000000 | 0.06122400000  | 1.26229400000  |
| C | -5.30117600000 | -0.85289700000 | 1.29765000000  |
| H | -7.27898700000 | -0.18542400000 | 0.78060300000  |
| H | -5.61933300000 | -1.34609700000 | 2.20922200000  |
| H | -3.24248000000 | -1.41218000000 | 1.54399200000  |
| H | -2.59875500000 | -0.81262800000 | -2.40709300000 |

-----

## K

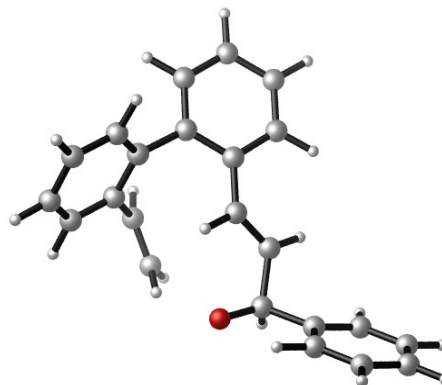

|                                              |                             |
|----------------------------------------------|-----------------------------|
| Zero-point correction=                       | 0.348262 (Hartree/Particle) |
| Thermal correction to Energy=                | 0.398669                    |
| Thermal correction to Enthalpy=              | 0.400199                    |
| Thermal correction to Gibbs Free Energy=     | 0.246363                    |
| Sum of electronic and zero-point Energies=   | -962.652951                 |
| Sum of electronic and thermal Energies=      | -962.602543                 |
| Sum of electronic and thermal Enthalpies=    | -962.601013                 |
| Sum of electronic and thermal Free Energies= | -962.754850                 |

E(RwB97XD) = -963.163298602

C 0.953736000000 -1.322267000000 2.489588000000  
H -2.269672000000 -0.646190000000 1.940481000000  
H 0.285211000000 -1.961461000000 1.908595000000  
C -2.082030000000 -0.706852000000 0.824232000000  
C -3.471479000000 -0.386767000000 0.211139000000  
C -1.204432000000 0.537385000000 0.585925000000  
O -1.550517000000 -1.851990000000 0.425602000000  
C -3.914751000000 -1.158976000000 -0.858329000000  
C -5.147178000000 -0.909597000000 -1.453511000000  
H -3.251819000000 -1.957542000000 -1.178034000000  
C -5.964352000000 0.114028000000 -0.980505000000  
H -5.478618000000 -1.520709000000 -2.288899000000  
H 0.605297000000 -0.986093000000 3.461849000000  
C -4.300643000000 0.630105000000 0.686126000000  
C -0.020609000000 0.425289000000 -0.013992000000  
C 1.008477000000 1.466798000000 -0.108190000000  
C 2.372185000000 1.121193000000 -0.236727000000  
C 2.803631000000 -0.301439000000 -0.369074000000  
C 3.342586000000 2.123470000000 -0.300256000000  
H 4.384508000000 1.832707000000 -0.396220000000  
C 3.361879000000 -0.717146000000 -1.578502000000  
H 3.479261000000 0.011271000000 -2.374563000000  
C 3.723839000000 -2.041502000000 -1.789542000000  
H 4.143479000000 -2.344186000000 -2.743237000000  
C 0.686741000000 2.831610000000 -0.062605000000  
C 1.659114000000 3.817214000000 -0.115010000000  
H 1.369315000000 4.862748000000 -0.076796000000  
H -0.358822000000 3.113780000000 -0.002090000000  
C 2.625440000000 -1.239295000000 0.662180000000  
C 2.975515000000 -2.570265000000 0.429820000000  
H 2.815619000000 -3.290587000000 1.224442000000  
C 2.087879000000 -0.844039000000 1.986909000000  
H 2.657587000000 -0.090571000000 2.528837000000

C 3.517462000000 -2.975202000000 -0.782877000000  
H 3.773483000000 -4.017680000000 -0.940366000000  
C 3.001074000000 3.466941000000 -0.231637000000  
H 3.770666000000 4.230479000000 -0.275799000000  
H 0.222689000000 -0.580809000000 -0.347374000000  
H -1.539812000000 1.483537000000 1.015099000000  
C -5.535776000000 0.883517000000 0.098317000000  
H -6.928630000000 0.306344000000 -1.441556000000  
H -6.168425000000 1.678676000000 0.483414000000  
H -3.977028000000 1.226967000000 1.536529000000

-----

### TS<sub>KL</sub>

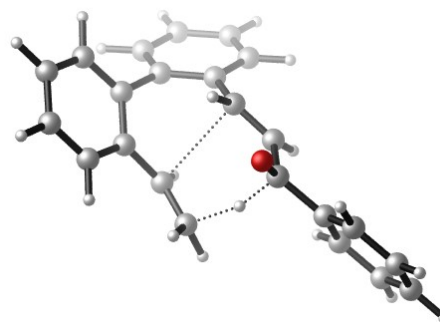

Frequency -1058.5494

Zero-point correction= 0.344803 (Hartree/Particle)

Thermal correction to Energy= 0.393749

Thermal correction to Enthalpy= 0.395279

Thermal correction to Gibbs Free Energy= 0.248679

Sum of electronic and zero-point Energies= -962.631081

Sum of electronic and thermal Energies= -962.582135

Sum of electronic and thermal Enthalpies= -962.580605

Sum of electronic and thermal Free Energies= -962.727204

E(RwB97XD) = -963.137747138

C -0.495680000000 -1.344055000000 1.629115000000

H -1.399990000000 -0.777059000000 0.582607000000

H -0.691388000000 -2.369438000000 1.320367000000

C -1.866915000000 -0.412319000000 -0.610709000000  
 C -3.320745000000 -0.106820000000 -0.244863000000  
 C -0.946333000000 0.760275000000 -0.544488000000  
 O -1.658363000000 -1.355038000000 -1.454067000000  
 C -4.327129000000 -0.733780000000 -0.978152000000  
 C -5.668241000000 -0.514305000000 -0.684075000000  
 H -4.008073000000 -1.396957000000 -1.775255000000  
 C -6.030578000000 0.330590000000 0.360850000000  
 H -6.437667000000 -1.007713000000 -1.271235000000  
 H -1.120330000000 -0.979193000000 2.442170000000  
 C -3.694632000000 0.728523000000 0.811497000000  
 C 0.344773000000 0.588064000000 -0.869214000000  
 C 1.448328000000 1.485409000000 -0.500752000000  
 C 2.652474000000 0.929600000000 -0.004769000000  
 C 2.828115000000 -0.549058000000 0.067706000000  
 C 3.677778000000 1.779124000000 0.402025000000  
 H 4.586336000000 1.343644000000 0.806851000000  
 C 3.921004000000 -1.126765000000 -0.573685000000  
 H 4.627905000000 -0.477652000000 -1.082238000000  
 C 4.097171000000 -2.505876000000 -0.614848000000  
 H 4.950458000000 -2.934509000000 -1.129512000000  
 C 1.339779000000 2.874385000000 -0.585051000000  
 C 2.374756000000 3.710333000000 -0.176686000000  
 H 2.261496000000 4.787293000000 -0.253216000000  
 H 0.427265000000 3.297224000000 -0.992535000000  
 C 1.871171000000 -1.372600000000 0.716481000000  
 C 2.064165000000 -2.761297000000 0.649889000000  
 H 1.347381000000 -3.407850000000 1.144411000000  
 C 0.754679000000 -0.789881000000 1.452326000000  
 H 0.930596000000 0.200834000000 1.859833000000  
 C 3.148841000000 -3.321254000000 -0.006705000000  
 H 3.258502000000 -4.401084000000 -0.036447000000  
 C 3.550002000000 3.163955000000 0.318832000000

H 4.362931000000 3.805639000000 0.642903000000  
 H 0.592582000000 -0.342506000000 -1.372567000000  
 H -1.246873000000 1.630216000000 0.038065000000  
 C -5.033908000000 0.949203000000 1.111288000000  
 H -7.077140000000 0.500290000000 0.594301000000  
 H -5.302216000000 1.600501000000 1.938046000000  
 H -2.928129000000 1.199917000000 1.419919000000

-----

**L**

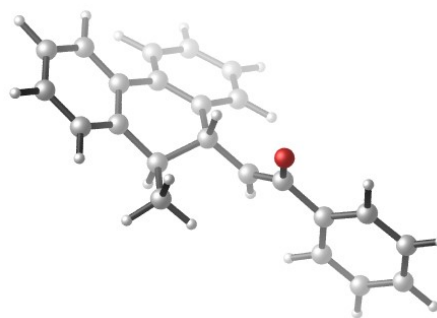

Zero-point correction= 0.352373 (Hartree/Particle)  
 Thermal correction to Energy= 0.401135  
 Thermal correction to Enthalpy= 0.402665  
 Thermal correction to Gibbs Free Energy= 0.253482  
 Sum of electronic and zero-point Energies= -962.727234  
 Sum of electronic and thermal Energies= -962.678472  
 Sum of electronic and thermal Enthalpies= -962.676942  
 Sum of electronic and thermal Free Energies= -962.826124  
 E(RwB97XD) = -963.241339668  
 C 0.306438000000 -2.437118000000 0.851531000000  
 H -0.735857000000 -2.250809000000 1.112259000000  
 H 0.311887000000 -2.920988000000 -0.129560000000  
 C -2.107373000000 -0.507314000000 -0.575508000000  
 C -3.566443000000 -0.292339000000 -0.189701000000  
 C -1.140881000000 0.074239000000 0.219472000000  
 O -1.902823000000 -1.192229000000 -1.622349000000  
 C -4.534891000000 -0.500862000000 -1.174743000000



|   |                 |                 |                 |
|---|-----------------|-----------------|-----------------|
| C | -5.887069000000 | -0.321301000000 | -0.908797000000 |
| H | -4.179780000000 | -0.818583000000 | -2.149068000000 |
| C | -6.308804000000 | 0.055573000000  | 0.362951000000  |
| H | -6.618559000000 | -0.482134000000 | -1.695915000000 |
| H | 0.736870000000  | -3.119723000000 | 1.591793000000  |
| C | -4.005639000000 | 0.072159000000  | 1.086880000000  |
| C | 0.313243000000  | -0.078083000000 | -0.104362000000 |
| C | 1.083645000000  | 1.233839000000  | -0.072476000000 |
| C | 2.485918000000  | 1.229217000000  | 0.031622000000  |
| C | 3.196803000000  | -0.068789000000 | 0.007491000000  |
| C | 3.177396000000  | 2.440729000000  | 0.124254000000  |
| H | 4.254342000000  | 2.436793000000  | 0.257017000000  |
| C | 4.524539000000  | -0.167022000000 | -0.414219000000 |
| H | 5.046647000000  | 0.722338000000  | -0.750006000000 |
| C | 5.181996000000  | -1.389348000000 | -0.444344000000 |
| H | 6.212452000000  | -1.443949000000 | -0.780123000000 |
| C | 0.427773000000  | 2.462141000000  | -0.150672000000 |
| C | 1.125116000000  | 3.661475000000  | -0.089079000000 |
| H | 0.587150000000  | 4.602576000000  | -0.147758000000 |
| H | -0.651245000000 | 2.449594000000  | -0.257973000000 |
| C | 2.499980000000  | -1.233059000000 | 0.379346000000  |
| C | 3.173139000000  | -2.453191000000 | 0.335942000000  |
| H | 2.647830000000  | -3.360057000000 | 0.609002000000  |
| C | 1.049266000000  | -1.106206000000 | 0.804765000000  |
| H | 1.048298000000  | -0.679088000000 | 1.820953000000  |
| C | 4.502207000000  | -2.538204000000 | -0.064165000000 |
| H | 4.997264000000  | -3.503614000000 | -0.093427000000 |
| C | 2.506857000000  | 3.653775000000  | 0.066079000000  |
| H | 3.059244000000  | 4.584780000000  | 0.144143000000  |
| H | 0.357973000000  | -0.474749000000 | -1.130977000000 |
| H | -1.406795000000 | 0.660164000000  | 1.093083000000  |
| C | -5.357820000000 | 0.245588000000  | 1.361518000000  |
| H | -7.364823000000 | 0.189986000000  | 0.576943000000  |

|   |                 |                |                |
|---|-----------------|----------------|----------------|
| H | -5.672076000000 | 0.523247000000 | 2.363711000000 |
| H | -3.280612000000 | 0.206639000000 | 1.881982000000 |

-----

**K'**

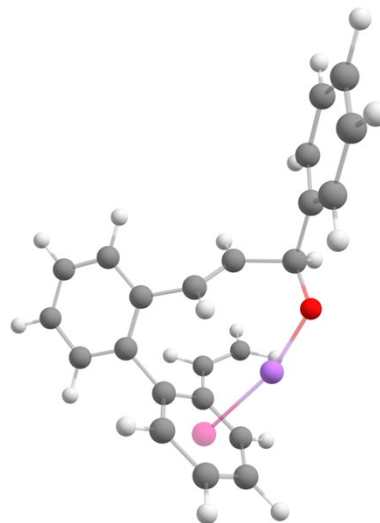

|                                              |                             |
|----------------------------------------------|-----------------------------|
| Zero-point correction=                       | 0.352903 (Hartree/Particle) |
| Thermal correction to Energy=                | 0.406040                    |
| Thermal correction to Enthalpy=              | 0.407570                    |
| Thermal correction to Gibbs Free Energy=     | 0.246663                    |
| Sum of electronic and zero-point Energies=   | -970.211559                 |
| Sum of electronic and thermal Energies=      | -970.158422                 |
| Sum of electronic and thermal Enthalpies=    | -970.156892                 |
| Sum of electronic and thermal Free Energies= | -970.317800                 |

E(RwB97XD) = -970.728510073

|   |              |              |              |
|---|--------------|--------------|--------------|
| C | 1.694872000  | -0.921147000 | 3.007269000  |
| H | -1.997721000 | -1.105170000 | 1.795156000  |
| H | 1.143281000  | -1.854377000 | 2.942681000  |
| C | -1.889898000 | -0.840997000 | 0.722097000  |
| C | -3.281818000 | -0.382514000 | 0.267868000  |
| C | -0.965801000 | 0.386564000  | 0.708627000  |
| O | -1.385052000 | -1.874955000 | -0.004379000 |
| C | -3.787572000 | -0.817395000 | -0.951483000 |
| C | -5.035154000 | -0.387320000 | -1.391854000 |

|   |              |              |              |
|---|--------------|--------------|--------------|
| H | -3.185329000 | -1.509488000 | -1.528636000 |
| C | -5.793397000 | 0.481211000  | -0.614676000 |
| H | -5.421295000 | -0.737013000 | -2.343967000 |
| H | 1.624426000  | -0.373756000 | 3.939598000  |
| C | -4.051176000 | 0.480091000  | 1.048266000  |
| C | -0.097642000 | 0.591970000  | -0.276184000 |
| C | 0.997199000  | 1.580022000  | -0.309523000 |
| C | 2.307815000  | 1.098597000  | -0.476376000 |
| C | 2.516411000  | -0.380074000 | -0.516918000 |
| C | 3.378298000  | 1.983984000  | -0.542178000 |
| H | 4.385068000  | 1.598695000  | -0.667352000 |
| C | 2.592917000  | -1.049582000 | -1.738766000 |
| H | 2.562675000  | -0.469129000 | -2.654277000 |
| C | 2.665930000  | -2.438472000 | -1.796130000 |
| H | 2.714644000  | -2.940318000 | -2.755380000 |
| C | 0.797149000  | 2.953350000  | -0.186254000 |
| C | 1.871739000  | 3.833894000  | -0.238119000 |
| H | 1.699117000  | 4.900180000  | -0.143714000 |
| H | -0.213980000 | 3.326545000  | -0.066168000 |
| C | 2.525660000  | -1.123504000 | 0.680631000  |
| C | 2.624606000  | -2.519293000 | 0.610423000  |
| H | 2.664260000  | -3.091041000 | 1.530646000  |
| C | 2.395370000  | -0.442192000 | 1.983648000  |
| H | 2.873296000  | 0.529153000  | 2.067445000  |
| C | 2.681964000  | -3.176485000 | -0.615111000 |
| H | 2.753236000  | -4.257570000 | -0.646323000 |
| C | 3.161844000  | 3.352924000  | -0.425113000 |
| H | 3.999234000  | 4.039386000  | -0.475471000 |
| H | -0.139630000 | -0.092353000 | -1.123515000 |
| H | -0.986581000 | 1.059721000  | 1.564727000  |
| C | -5.297605000 | 0.912346000  | 0.612126000  |
| H | -6.767446000 | 0.813866000  | -0.956775000 |
| H | -5.886327000 | 1.581186000  | 1.231357000  |

|    |              |              |              |
|----|--------------|--------------|--------------|
| H  | -3.674749000 | 0.812043000  | 2.012740000  |
| Li | 0.287989000  | -2.095599000 | -0.353788000 |

-----

**TS<sub>K'L'</sub>**

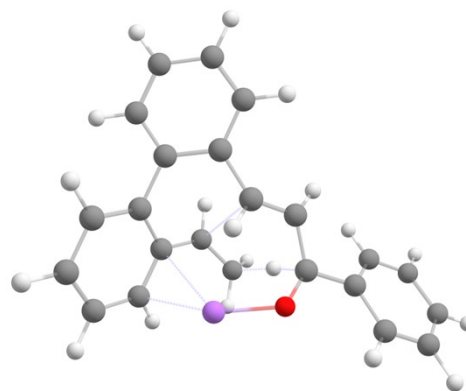

Zero-point correction= 0.349859 (Hartree/Particle)

Thermal correction to Energy= 0.400839

Thermal correction to Enthalpy= 0.402369

Thermal correction to Gibbs Free Energy= 0.252223

Sum of electronic and zero-point Energies= -970.173396

Sum of electronic and thermal Energies= -970.122416

Sum of electronic and thermal Enthalpies= -970.120886

Sum of electronic and thermal Free Energies= -970.271032

E(RwB97XD) = -970.686951899

|   |              |              |             |
|---|--------------|--------------|-------------|
| C | -0.554169000 | -0.950040000 | 1.883456000 |
|---|--------------|--------------|-------------|

|   |              |              |             |
|---|--------------|--------------|-------------|
| H | -1.382493000 | -0.430893000 | 0.900558000 |
|---|--------------|--------------|-------------|

|   |              |              |             |
|---|--------------|--------------|-------------|
| H | -0.853949000 | -1.992597000 | 1.763264000 |
|---|--------------|--------------|-------------|

|   |              |              |              |
|---|--------------|--------------|--------------|
| C | -1.807068000 | -0.200713000 | -0.404871000 |
|---|--------------|--------------|--------------|

|   |              |             |              |
|---|--------------|-------------|--------------|
| C | -3.281061000 | 0.043030000 | -0.216069000 |
|---|--------------|-------------|--------------|

|   |              |             |              |
|---|--------------|-------------|--------------|
| C | -0.904556000 | 0.954960000 | -0.436930000 |
|---|--------------|-------------|--------------|

|   |              |              |              |
|---|--------------|--------------|--------------|
| O | -1.461107000 | -1.289885000 | -1.046653000 |
|---|--------------|--------------|--------------|

|   |              |              |              |
|---|--------------|--------------|--------------|
| C | -4.190613000 | -0.742493000 | -0.920866000 |
|---|--------------|--------------|--------------|

|   |              |              |              |
|---|--------------|--------------|--------------|
| C | -5.558808000 | -0.551418000 | -0.765687000 |
|---|--------------|--------------|--------------|

|   |              |              |              |
|---|--------------|--------------|--------------|
| H | -3.800462000 | -1.498532000 | -1.591188000 |
|---|--------------|--------------|--------------|

|   |              |             |             |
|---|--------------|-------------|-------------|
| C | -6.037153000 | 0.419993000 | 0.105338000 |
|---|--------------|-------------|-------------|

|    |              |              |              |
|----|--------------|--------------|--------------|
| H  | -6.254744000 | -1.165271000 | -1.327535000 |
| H  | -1.040475000 | -0.455052000 | 2.721342000  |
| C  | -3.769697000 | 1.009997000  | 0.665961000  |
| C  | 0.387430000  | 0.740623000  | -0.747179000 |
| C  | 1.581510000  | 1.545365000  | -0.459045000 |
| C  | 2.740641000  | 0.847600000  | -0.045327000 |
| C  | 2.723012000  | -0.643235000 | 0.041666000  |
| C  | 3.887795000  | 1.563761000  | 0.276439000  |
| H  | 4.768623000  | 1.028554000  | 0.615810000  |
| C  | 3.640047000  | -1.384986000 | -0.689919000 |
| H  | 4.377324000  | -0.855885000 | -1.284990000 |
| C  | 3.610392000  | -2.780988000 | -0.712795000 |
| H  | 4.336289000  | -3.332625000 | -1.297797000 |
| C  | 1.618640000  | 2.933051000  | -0.545345000 |
| C  | 2.775234000  | 3.636346000  | -0.221475000 |
| H  | 2.786838000  | 4.718029000  | -0.295793000 |
| H  | 0.735513000  | 3.463018000  | -0.885593000 |
| C  | 1.725075000  | -1.314483000 | 0.809127000  |
| C  | 1.716679000  | -2.722162000 | 0.776714000  |
| H  | 1.010805000  | -3.257214000 | 1.406013000  |
| C  | 0.738442000  | -0.552106000 | 1.558344000  |
| H  | 1.051111000  | 0.436057000  | 1.872616000  |
| C  | 2.638793000  | -3.445287000 | 0.018256000  |
| H  | 2.607083000  | -4.529594000 | 0.029116000  |
| C  | 3.910856000  | 2.953572000  | 0.188063000  |
| H  | 4.814035000  | 3.496257000  | 0.442624000  |
| H  | 0.598359000  | -0.168564000 | -1.301261000 |
| H  | -1.211090000 | 1.863153000  | 0.073206000  |
| C  | -5.135521000 | 1.199057000  | 0.824427000  |
| H  | -7.104334000 | 0.567246000  | 0.228815000  |
| H  | -5.498685000 | 1.951996000  | 1.515520000  |
| H  | -3.079992000 | 1.611584000  | 1.249803000  |
| Li | 0.031230000  | -2.162419000 | -0.785005000 |

L'

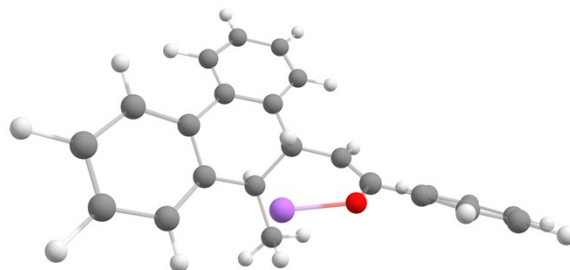

|                                              |                             |              |              |
|----------------------------------------------|-----------------------------|--------------|--------------|
| Zero-point correction=                       | 0.356862 (Hartree/Particle) |              |              |
| Thermal correction to Energy=                | 0.407821                    |              |              |
| Thermal correction to Enthalpy=              | 0.409351                    |              |              |
| Thermal correction to Gibbs Free Energy=     | 0.257548                    |              |              |
| Sum of electronic and zero-point Energies=   | -970.255149                 |              |              |
| Sum of electronic and thermal Energies=      | -970.204190                 |              |              |
| Sum of electronic and thermal Enthalpies=    | -970.202660                 |              |              |
| Sum of electronic and thermal Free Energies= | -970.354463                 |              |              |
| E(RwB97XD) =                                 | -970.775532751              |              |              |
| C                                            | 0.042517000                 | -1.669414000 | 1.895005000  |
| H                                            | -0.825372000                | -1.154670000 | 2.306320000  |
| H                                            | -0.364193000                | -2.440538000 | 1.230626000  |
| C                                            | -1.995105000                | -0.353444000 | -0.262815000 |
| C                                            | -3.477318000                | -0.150100000 | -0.196029000 |
| C                                            | -1.132279000                | 0.553174000  | 0.280887000  |
| O                                            | -1.592481000                | -1.428802000 | -0.888049000 |
| C                                            | -4.287501000                | -0.791288000 | -1.134318000 |
| C                                            | -5.665854000                | -0.618805000 | -1.121893000 |
| H                                            | -3.811772000                | -1.427034000 | -1.871060000 |
| C                                            | -6.262241000                | 0.186599000  | -0.158260000 |
| H                                            | -6.278040000                | -1.118200000 | -1.865455000 |
| H                                            | 0.563619000                 | -2.183580000 | 2.706741000  |
| C                                            | -4.088434000                | 0.645111000  | 0.776619000  |
| C                                            | 0.327711000                 | 0.288132000  | 0.149591000  |
| C                                            | 1.286716000                 | 1.453416000  | 0.017883000  |

|    |              |              |              |
|----|--------------|--------------|--------------|
| C  | 2.654897000  | 1.132062000  | -0.081586000 |
| C  | 3.034187000  | -0.300918000 | -0.098753000 |
| C  | 3.595366000  | 2.154633000  | -0.191125000 |
| H  | 4.652252000  | 1.914124000  | -0.236012000 |
| C  | 4.144550000  | -0.775458000 | -0.791915000 |
| H  | 4.773865000  | -0.079143000 | -1.335182000 |
| C  | 4.440235000  | -2.135105000 | -0.828271000 |
| H  | 5.306594000  | -2.483777000 | -1.378538000 |
| C  | 0.893814000  | 2.783492000  | -0.040236000 |
| C  | 1.840849000  | 3.796119000  | -0.157346000 |
| H  | 1.520250000  | 4.831395000  | -0.191183000 |
| H  | -0.160595000 | 3.029268000  | -0.000781000 |
| C  | 2.202188000  | -1.220582000 | 0.574897000  |
| C  | 2.503270000  | -2.579635000 | 0.527066000  |
| H  | 1.887433000  | -3.289705000 | 1.070895000  |
| C  | 0.967957000  | -0.651756000 | 1.235191000  |
| H  | 1.302689000  | 0.014495000  | 2.041051000  |
| C  | 3.619399000  | -3.039880000 | -0.173300000 |
| H  | 3.844412000  | -4.100227000 | -0.196378000 |
| C  | 3.192276000  | 3.483381000  | -0.224810000 |
| H  | 3.932548000  | 4.271435000  | -0.302765000 |
| H  | 0.437634000  | -0.217575000 | -0.828570000 |
| H  | -1.490262000 | 1.443674000  | 0.778664000  |
| C  | -5.466794000 | 0.814182000  | 0.794670000  |
| H  | -7.338692000 | 0.317858000  | -0.143527000 |
| H  | -5.923003000 | 1.431145000  | 1.561515000  |
| H  | -3.484898000 | 1.122916000  | 1.540246000  |
| Li | -0.009017000 | -2.158312000 | -0.843039000 |

-----

**1**

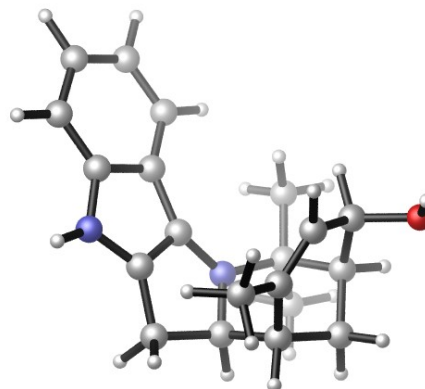

|                                              |                             |                 |                 |
|----------------------------------------------|-----------------------------|-----------------|-----------------|
| Zero-point correction=                       | 0.408045 (Hartree/Particle) |                 |                 |
| Thermal correction to Energy=                | 0.427526                    |                 |                 |
| Thermal correction to Enthalpy=              | 0.428470                    |                 |                 |
| Thermal correction to Gibbs Free Energy=     | 0.362024                    |                 |                 |
| Sum of electronic and zero-point Energies=   | -960.820719                 |                 |                 |
| Sum of electronic and thermal Energies=      | -960.801239                 |                 |                 |
| Sum of electronic and thermal Enthalpies=    | -960.800294                 |                 |                 |
| Sum of electronic and thermal Free Energies= | -960.866741                 |                 |                 |
| E(RwB97XD) =                                 | -961.390343578              |                 |                 |
| H                                            | 0.260203000000              | 2.175529000000  | -2.719737000000 |
| H                                            | -0.348950000000             | 3.074688000000  | -1.323352000000 |
| H                                            | -0.997141000000             | 0.642906000000  | 2.851595000000  |
| C                                            | -0.026489000000             | 2.087344000000  | -1.663794000000 |
| C                                            | 2.557636000000              | -1.702315000000 | 0.229448000000  |
| H                                            | 1.962796000000              | -2.596695000000 | 0.132037000000  |
| C                                            | 4.681226000000              | -0.703894000000 | 0.859048000000  |
| C                                            | 4.243753000000              | 0.546105000000  | 0.470606000000  |
| C                                            | -0.996522000000             | 2.895263000000  | 1.424385000000  |
| H                                            | -2.632666000000             | 2.303243000000  | -0.620575000000 |
| H                                            | -3.938274000000             | 0.443085000000  | 0.451109000000  |
| H                                            | -3.659361000000             | 0.118446000000  | -1.256205000000 |
| H                                            | -3.114664000000             | -1.889905000000 | 0.121371000000  |
| H                                            | -1.740633000000             | 3.670337000000  | 1.213588000000  |
| H                                            | -0.757987000000             | 2.928188000000  | 2.489373000000  |

|   |                 |                 |                 |
|---|-----------------|-----------------|-----------------|
| H | -0.087338000000 | 3.153391000000  | 0.874638000000  |
| C | -1.299156000000 | -1.394440000000 | -0.919480000000 |
| C | 2.954725000000  | 0.661313000000  | -0.047687000000 |
| C | -2.138972000000 | 1.364748000000  | -0.340883000000 |
| C | -3.163202000000 | 0.230036000000  | -0.288692000000 |
| C | -2.418882000000 | -1.045608000000 | 0.111890000000  |
| C | 2.055912000000  | -0.443815000000 | -0.151258000000 |
| C | -1.955471000000 | -0.873197000000 | 1.564432000000  |
| O | -3.093627000000 | -1.183502000000 | 2.384042000000  |
| H | -1.171422000000 | -1.597777000000 | 1.804366000000  |
| C | 1.054270000000  | 1.440682000000  | -0.878215000000 |
| C | -1.135769000000 | 1.030608000000  | -1.478908000000 |
| C | 0.826579000000  | 0.115096000000  | -0.677869000000 |
| C | -1.507929000000 | 1.538220000000  | 1.027479000000  |
| C | -1.442322000000 | 0.504899000000  | 1.866813000000  |
| N | -0.429106000000 | -0.246758000000 | -1.233118000000 |
| N | 2.341051000000  | 1.786456000000  | -0.540414000000 |
| H | -2.994510000000 | -0.732416000000 | 3.223308000000  |
| H | 2.705107000000  | 2.719195000000  | -0.470127000000 |
| C | 3.842650000000  | -1.820146000000 | 0.724239000000  |
| H | 4.209896000000  | -2.799186000000 | 1.010555000000  |
| H | 5.681918000000  | -0.825270000000 | 1.257670000000  |
| H | 4.886821000000  | 1.416409000000  | 0.548481000000  |
| C | -0.484883000000 | -2.589928000000 | -0.444177000000 |
| H | -1.154056000000 | -3.437488000000 | -0.276501000000 |
| H | 0.245726000000  | -2.874073000000 | -1.205122000000 |
| H | 0.040326000000  | -2.390916000000 | 0.486429000000  |
| C | -1.967042000000 | -1.827735000000 | -2.241891000000 |
| H | -1.194350000000 | -2.119030000000 | -2.956174000000 |
| H | -2.629519000000 | -2.681191000000 | -2.072821000000 |
| H | -2.560575000000 | -1.035597000000 | -2.699622000000 |
| H | -1.726620000000 | 0.944829000000  | -2.394808000000 |

-----

### TS<sub>1-2</sub>

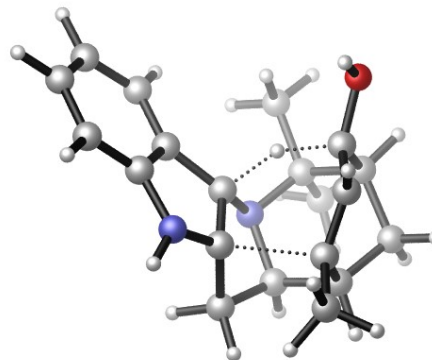

Frequency -1053.4341

Zero-point correction= 0.403835 (Hartree/Particle)

Thermal correction to Energy= 0.421725

Thermal correction to Enthalpy= 0.422669

Thermal correction to Gibbs Free Energy= 0.361301

Sum of electronic and zero-point Energies= -960.759058

Sum of electronic and thermal Energies= -960.741167

Sum of electronic and thermal Enthalpies= -960.740223

Sum of electronic and thermal Free Energies= -960.801592

E(RwB97XD) = -961.322108077

|   |                 |                 |                 |
|---|-----------------|-----------------|-----------------|
| C | 0.440918000000  | -0.088431000000 | -0.467511000000 |
| H | -0.046046000000 | -0.299176000000 | 0.847691000000  |
| C | 1.872689000000  | -0.381992000000 | -0.299018000000 |
| C | 2.642664000000  | -1.538416000000 | -0.198466000000 |
| H | 2.195263000000  | -2.513420000000 | -0.334852000000 |
| C | 4.004659000000  | -1.434967000000 | 0.056272000000  |
| C | 4.605650000000  | -0.187487000000 | 0.237917000000  |
| C | 3.863232000000  | 0.981506000000  | 0.146078000000  |
| H | 5.668659000000  | -0.128635000000 | 0.443472000000  |
| C | 2.508592000000  | 0.873239000000  | -0.150445000000 |
| H | 4.329586000000  | 1.952128000000  | 0.275197000000  |
| N | 1.585896000000  | 1.887791000000  | -0.350350000000 |
| C | 0.346959000000  | 1.323767000000  | -0.653186000000 |
| C | -0.433282000000 | 1.519877000000  | -1.928814000000 |

|   |                 |                 |                 |
|---|-----------------|-----------------|-----------------|
| H | 0.184244000000  | 1.256341000000  | -2.795072000000 |
| H | -0.870704000000 | 2.507316000000  | -2.084827000000 |
| C | -1.473354000000 | 0.456754000000  | -1.623216000000 |
| C | -2.303791000000 | 1.056197000000  | -0.455699000000 |
| H | -2.982581000000 | 1.798876000000  | -0.889250000000 |
| C | -3.097849000000 | -0.026643000000 | 0.270084000000  |
| H | -3.638186000000 | 0.408700000000  | 1.114247000000  |
| H | -3.833459000000 | -0.486785000000 | -0.392645000000 |
| C | -1.372881000000 | 1.772255000000  | 0.551087000000  |
| C | -1.418239000000 | 3.281988000000  | 0.577325000000  |
| H | -2.414411000000 | 3.634355000000  | 0.867802000000  |
| H | -0.697195000000 | 3.678583000000  | 1.296845000000  |
| H | -1.198129000000 | 3.722330000000  | -0.398889000000 |
| C | -2.081303000000 | -1.051606000000 | 0.767141000000  |
| H | -2.555450000000 | -1.816920000000 | 1.387583000000  |
| C | -1.384017000000 | -1.738966000000 | -0.446422000000 |
| N | -0.630585000000 | -0.712405000000 | -1.209848000000 |
| C | -0.439115000000 | -2.833207000000 | 0.048975000000  |
| C | -2.389089000000 | -2.410461000000 | -1.388325000000 |
| C | -1.062820000000 | -0.317841000000 | 1.661496000000  |
| O | -0.744472000000 | -1.076575000000 | 2.786880000000  |
| C | -1.143590000000 | 1.097683000000  | 1.744317000000  |
| H | -0.667752000000 | 1.608219000000  | 2.578944000000  |
| H | -0.112953000000 | -0.588484000000 | 3.318440000000  |
| H | -2.102490000000 | 0.185084000000  | -2.471063000000 |
| H | 1.843334000000  | 2.828521000000  | -0.587753000000 |
| H | 4.607112000000  | -2.333966000000 | 0.116229000000  |
| H | -1.026212000000 | -3.641541000000 | 0.492072000000  |
| H | 0.130864000000  | -3.239424000000 | -0.790417000000 |
| H | 0.250500000000  | -2.480182000000 | 0.815552000000  |
| H | -1.846700000000 | -2.977404000000 | -2.148337000000 |
| H | -3.023601000000 | -3.101916000000 | -0.826736000000 |
| H | -3.041302000000 | -1.707189000000 | -1.905425000000 |

2

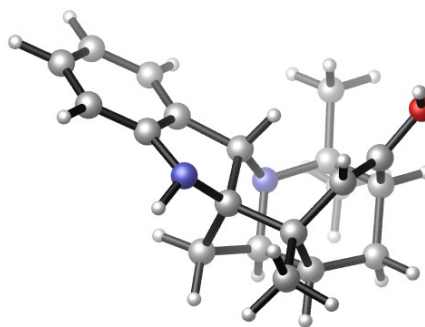

```

-----
Zero-point correction=          0.410297 (Hartree/Particle)
Thermal correction to Energy=          0.427852
Thermal correction to Enthalpy=        0.428796
Thermal correction to Gibbs Free Energy= 0.367913
Sum of electronic and zero-point Energies= -960.834599
Sum of electronic and thermal Energies=   -960.817044
Sum of electronic and thermal Enthalpies=  -960.816100
Sum of electronic and thermal Free Energies= -960.876983
E(RwB97XD) = -961.403927865
C   0.527992000000  -0.299304000000  0.075168000000
H   0.186567000000  -0.446597000000  1.096583000000
C   2.015657000000  -0.548034000000  0.078150000000
C   2.769273000000  -1.699180000000  -0.002501000000
H   2.286885000000  -2.653927000000  -0.183659000000
C   4.157782000000  -1.611233000000  0.130658000000
C   4.759887000000  -0.377911000000  0.352425000000
C   4.003895000000  0.792426000000  0.439213000000
H   5.838163000000  -0.318887000000  0.453353000000
C   2.628659000000  0.693923000000  0.297854000000
H   4.483805000000  1.751223000000  0.604238000000
N   1.671374000000  1.732748000000  0.342325000000
C   0.480603000000  1.184109000000  -0.286954000000
C   0.476830000000  1.048174000000  -1.825649000000

```

|   |                |                |                |
|---|----------------|----------------|----------------|
| H | 1.37228000000  | 0.55406500000  | -2.20515200000 |
| H | 0.32053800000  | 1.98998100000  | -2.35586000000 |
| C | -0.75934300000 | 0.16874300000  | -1.81978200000 |
| C | -1.77718800000 | 1.11510900000  | -1.15312600000 |
| H | -2.03385700000 | 1.90818200000  | -1.86257600000 |
| C | -3.03337100000 | 0.37830200000  | -0.72557800000 |
| H | -3.76529100000 | 1.06179900000  | -0.28716100000 |
| H | -3.50507800000 | -0.08686500000 | -1.59515400000 |
| C | -0.94758300000 | 1.74640100000  | 0.03895800000  |
| C | -0.96256400000 | 3.27466500000  | -0.00738400000 |
| H | -1.98615400000 | 3.64965500000  | 0.08057500000  |
| H | -0.37650100000 | 3.69120500000  | 0.81766000000  |
| H | -0.54667000000 | 3.65261800000  | -0.94637800000 |
| C | -2.61105500000 | -0.66450500000 | 0.31273400000  |
| H | -3.46675800000 | -1.26428300000 | 0.63614900000  |
| C | -1.54079600000 | -1.64470400000 | -0.29652500000 |
| N | -0.38328400000 | -0.93443000000 | -0.89086400000 |
| C | -1.05509300000 | -2.63278500000 | 0.76762500000  |
| C | -2.19240000000 | -2.47586600000 | -1.41239800000 |
| C | -2.14322900000 | 0.13109900000  | 1.50609600000  |
| O | -2.54338300000 | -0.40457600000 | 2.69517600000  |
| C | -1.45185600000 | 1.26660500000  | 1.37912400000  |
| H | -1.14642700000 | 1.82609100000  | 2.26121900000  |
| H | -2.21013900000 | 0.13652000000  | 3.41515700000  |
| H | -1.08245600000 | -0.21693700000 | -2.78710800000 |
| H | 1.98993200000  | 2.61651200000  | -0.03079700000 |
| H | 4.76753500000  | -2.50442700000 | 0.05871700000  |
| H | -1.88045100000 | -3.28215000000 | 1.06965700000  |
| H | -0.25680600000 | -3.25455200000 | 0.35390600000  |
| H | -0.68300200000 | -2.14780000000 | 1.67054900000  |
| H | -1.47570600000 | -3.21781400000 | -1.77048700000 |
| H | -3.07672800000 | -2.99697400000 | -1.03513000000 |
| H | -2.49984100000 | -1.87446300000 | -2.26858000000 |

-----  
**M**

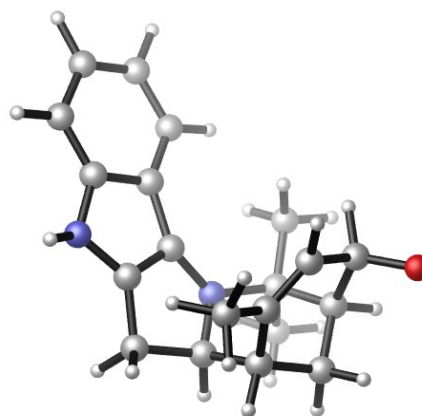

|                                              |                             |                |                |
|----------------------------------------------|-----------------------------|----------------|----------------|
| Zero-point correction=                       | 0.392990 (Hartree/Particle) |                |                |
| Thermal correction to Energy=                | 0.411686                    |                |                |
| Thermal correction to Enthalpy=              | 0.412630                    |                |                |
| Thermal correction to Gibbs Free Energy=     | 0.348005                    |                |                |
| Sum of electronic and zero-point Energies=   | -960.229449                 |                |                |
| Sum of electronic and thermal Energies=      | -960.210753                 |                |                |
| Sum of electronic and thermal Enthalpies=    | -960.209809                 |                |                |
| Sum of electronic and thermal Free Energies= | -960.274434                 |                |                |
| E(RwB97XD) =                                 | -960.781128602              |                |                |
| C                                            | 0.83669500000               | 0.10683600000  | -0.64433300000 |
| H                                            | -1.36482200000              | -1.60382900000 | 1.92070800000  |
| C                                            | 2.08079600000               | -0.43047400000 | -0.12055900000 |
| C                                            | 2.58898200000               | -1.67454900000 | 0.29033000000  |
| H                                            | 1.98361900000               | -2.56541000000 | 0.23739300000  |
| C                                            | 3.87979000000               | -1.77659600000 | 0.77966100000  |
| C                                            | 4.71532200000               | -0.65556500000 | 0.87999100000  |
| C                                            | 4.26756400000               | 0.58326400000  | 0.45954600000  |
| H                                            | 5.71813400000               | -0.76070300000 | 1.28018600000  |
| C                                            | 2.97697600000               | 0.67980200000  | -0.05493600000 |
| H                                            | 4.90614500000               | 1.45973500000  | 0.51144600000  |
| N                                            | 2.36154400000               | 1.79092600000  | -0.58470800000 |
| C                                            | 1.05682400000               | 1.42972900000  | -0.86891100000 |

|   |                 |                 |                 |
|---|-----------------|-----------------|-----------------|
| C | -0.030554000000 | 2.053932000000  | -1.660692000000 |
| H | 0.266406000000  | 2.152098000000  | -2.715179000000 |
| H | -0.374389000000 | 3.033492000000  | -1.316674000000 |
| C | -1.127874000000 | 0.979497000000  | -1.480651000000 |
| C | -2.164444000000 | 1.320524000000  | -0.384699000000 |
| H | -2.653996000000 | 2.253574000000  | -0.703597000000 |
| C | -3.184020000000 | 0.179474000000  | -0.361973000000 |
| H | -3.976203000000 | 0.380367000000  | 0.363882000000  |
| H | -3.645049000000 | 0.065472000000  | -1.352186000000 |
| C | -1.586001000000 | 1.519675000000  | 1.006047000000  |
| C | -1.099227000000 | 2.895546000000  | 1.387348000000  |
| H | -1.827864000000 | 3.670990000000  | 1.113147000000  |
| H | -0.933886000000 | 2.955699000000  | 2.466473000000  |
| H | -0.151839000000 | 3.154262000000  | 0.897155000000  |
| C | -2.456575000000 | -1.077979000000 | 0.106629000000  |
| H | -3.145292000000 | -1.929175000000 | 0.082481000000  |
| C | -1.273200000000 | -1.436537000000 | -0.846793000000 |
| N | -0.404952000000 | -0.282335000000 | -1.182302000000 |
| C | -0.454991000000 | -2.581775000000 | -0.267948000000 |
| C | -1.844373000000 | -1.946140000000 | -2.189359000000 |
| C | -2.173040000000 | -0.878713000000 | 1.644375000000  |
| O | -3.288202000000 | -1.029287000000 | 2.379181000000  |
| C | -1.576962000000 | 0.504629000000  | 1.873538000000  |
| H | -1.230376000000 | 0.678196000000  | 2.892208000000  |
| H | -1.682738000000 | 0.854797000000  | -2.416990000000 |
| H | 2.644936000000  | 2.728841000000  | -0.360043000000 |
| H | 4.247494000000  | -2.746179000000 | 1.098339000000  |
| H | -1.126373000000 | -3.415909000000 | -0.048769000000 |
| H | 0.298030000000  | -2.919213000000 | -0.987916000000 |
| H | 0.023505000000  | -2.299822000000 | 0.666739000000  |
| H | -1.024996000000 | -2.226193000000 | -2.858612000000 |
| H | -2.478882000000 | -2.820910000000 | -2.018704000000 |
| H | -2.452222000000 | -1.193509000000 | -2.695549000000 |

-----  
**TS<sub>MN</sub>**

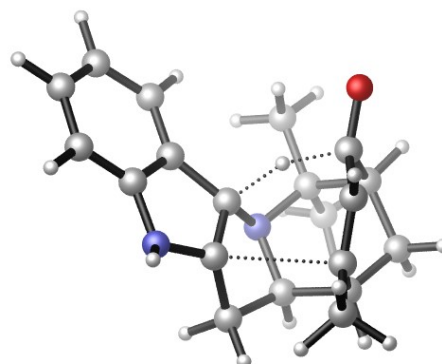

Frequency -1032.0515

Zero-point correction= 0.388227 (Hartree/Particle)

Thermal correction to Energy= 0.405948

Thermal correction to Enthalpy= 0.406893

Thermal correction to Gibbs Free Energy= 0.345374

Sum of electronic and zero-point Energies= -960.195544

Sum of electronic and thermal Energies= -960.177823

Sum of electronic and thermal Enthalpies= -960.176879

Sum of electronic and thermal Free Energies= -960.238397

E(RwB97XD) = -960.740846921

C 0.490302000000 0.033128000000 -0.401288000000

H -0.083939000000 -0.242259000000 0.892788000000

C 1.932196000000 -0.285785000000 -0.210817000000

C 2.679092000000 -1.435191000000 0.038003000000

H 2.210018000000 -2.407381000000 0.047656000000

C 4.043190000000 -1.343186000000 0.299574000000

C 4.680524000000 -0.102211000000 0.341450000000

C 3.969408000000 1.061214000000 0.083750000000

H 5.741081000000 -0.045355000000 0.566419000000

C 2.615577000000 0.954928000000 -0.225964000000

H 4.459128000000 2.030366000000 0.090437000000

N 1.756061000000 1.965697000000 -0.611303000000

C 0.456966000000 1.412098000000 -0.705247000000



|   |                 |                 |                 |
|---|-----------------|-----------------|-----------------|
| C | -0.481324000000 | 1.648979000000  | -1.842469000000 |
| H | 0.019219000000  | 1.493227000000  | -2.812712000000 |
| H | -0.982015000000 | 2.623958000000  | -1.871646000000 |
| C | -1.458014000000 | 0.519897000000  | -1.544010000000 |
| C | -2.418531000000 | 0.970569000000  | -0.404608000000 |
| H | -3.133485000000 | 1.664566000000  | -0.869460000000 |
| C | -3.153944000000 | -0.243840000000 | 0.165722000000  |
| H | -3.796225000000 | 0.069626000000  | 0.993922000000  |
| H | -3.796504000000 | -0.708986000000 | -0.590368000000 |
| C | -1.740290000000 | 1.687872000000  | 0.765318000000  |
| C | -1.863185000000 | 3.185020000000  | 0.833319000000  |
| H | -2.917039000000 | 3.494551000000  | 0.895762000000  |
| H | -1.345031000000 | 3.578214000000  | 1.712571000000  |
| H | -1.445165000000 | 3.673963000000  | -0.054294000000 |
| C | -2.079908000000 | -1.206655000000 | 0.663423000000  |
| H | -2.522846000000 | -2.052005000000 | 1.198157000000  |
| C | -1.262121000000 | -1.741886000000 | -0.538395000000 |
| N | -0.550327000000 | -0.616881000000 | -1.188306000000 |
| C | -0.281113000000 | -2.799863000000 | -0.037633000000 |
| C | -2.136393000000 | -2.426348000000 | -1.601290000000 |
| C | -1.137543000000 | -0.512858000000 | 1.720787000000  |
| O | -0.775698000000 | -1.221267000000 | 2.729562000000  |
| C | -1.343151000000 | 0.945093000000  | 1.823328000000  |
| H | -0.933568000000 | 1.417875000000  | 2.714003000000  |
| H | -2.053557000000 | 0.240283000000  | -2.418673000000 |
| H | 1.890540000000  | 2.889890000000  | -0.230759000000 |
| H | 4.610659000000  | -2.247162000000 | 0.494465000000  |
| H | -0.843929000000 | -3.692167000000 | 0.252735000000  |
| H | 0.416539000000  | -3.072944000000 | -0.835139000000 |
| H | 0.251427000000  | -2.463807000000 | 0.852583000000  |
| H | -1.492627000000 | -2.913116000000 | -2.339846000000 |
| H | -2.764369000000 | -3.188314000000 | -1.128155000000 |
| H | -2.793289000000 | -1.740449000000 | -2.137408000000 |

N

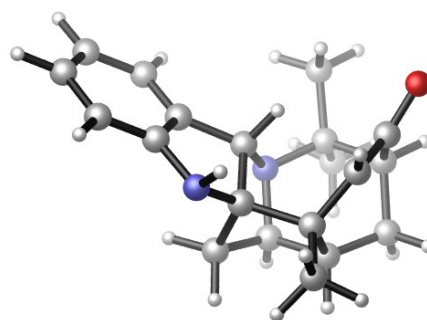

-----

|                                              |                             |                 |                 |
|----------------------------------------------|-----------------------------|-----------------|-----------------|
| Zero-point correction=                       | 0.394867 (Hartree/Particle) |                 |                 |
| Thermal correction to Energy=                | 0.412289                    |                 |                 |
| Thermal correction to Enthalpy=              | 0.413234                    |                 |                 |
| Thermal correction to Gibbs Free Energy=     | 0.352434                    |                 |                 |
| Sum of electronic and zero-point Energies=   | -960.278933                 |                 |                 |
| Sum of electronic and thermal Energies=      | -960.261510                 |                 |                 |
| Sum of electronic and thermal Enthalpies=    | -960.260566                 |                 |                 |
| Sum of electronic and thermal Free Energies= | -960.321365                 |                 |                 |
| E(RwB97XD) =                                 | -960.829407883              |                 |                 |
| C                                            | 0.499278000000              | -0.286785000000 | 0.023877000000  |
| H                                            | 0.167700000000              | -0.419828000000 | 1.053881000000  |
| C                                            | 1.986930000000              | -0.531702000000 | 0.004945000000  |
| C                                            | 2.741234000000              | -1.684190000000 | -0.074206000000 |
| H                                            | 2.254544000000              | -2.637211000000 | -0.255085000000 |
| C                                            | 4.127822000000              | -1.604384000000 | 0.091616000000  |
| C                                            | 4.733440000000              | -0.378692000000 | 0.343900000000  |
| C                                            | 3.977276000000              | 0.794853000000  | 0.407476000000  |
| H                                            | 5.809841000000              | -0.327310000000 | 0.474771000000  |
| C                                            | 2.606047000000              | 0.708249000000  | 0.231690000000  |
| H                                            | 4.451825000000              | 1.757202000000  | 0.568735000000  |
| N                                            | 1.682215000000              | 1.792123000000  | 0.187409000000  |
| C                                            | 0.443349000000              | 1.196961000000  | -0.324424000000 |
| C                                            | 0.370798000000              | 1.085760000000  | -1.855537000000 |
| H                                            | 1.247110000000              | 0.602261000000  | -2.294556000000 |

|   |                |                |                |
|---|----------------|----------------|----------------|
| H | 0.18873800000  | 2.03980800000  | -2.35456500000 |
| C | -0.86158200000 | 0.19920900000  | -1.80193800000 |
| C | -1.84876800000 | 1.12443500000  | -1.06353200000 |
| H | -2.14971700000 | 1.92265800000  | -1.75407900000 |
| C | -3.06845300000 | 0.37325100000  | -0.56583200000 |
| H | -3.75633500000 | 1.05286100000  | -0.05507200000 |
| H | -3.60876600000 | -0.06449900000 | -1.41564300000 |
| C | -0.97279800000 | 1.74754600000  | 0.10160800000  |
| C | -0.99024000000 | 3.27895700000  | 0.02899700000  |
| H | -2.02151900000 | 3.63509400000  | 0.11006300000  |
| H | -0.42725800000 | 3.71329700000  | 0.86256800000  |
| H | -0.55827900000 | 3.66044600000  | -0.90362900000 |
| C | -2.57477900000 | -0.68135800000 | 0.42178600000  |
| H | -3.40488300000 | -1.29660300000 | 0.78435800000  |
| C | -1.55574000000 | -1.64411000000 | -0.27371600000 |
| N | -0.42514300000 | -0.92574200000 | -0.92378700000 |
| C | -1.00359900000 | -2.65512400000 | 0.73630700000  |
| C | -2.25825400000 | -2.45606800000 | -1.37549500000 |
| C | -2.05066000000 | 0.06276200000  | 1.68560500000  |
| O | -2.29003300000 | -0.48486200000 | 2.79938000000  |
| C | -1.41919300000 | 1.27753000000  | 1.46119000000  |
| H | -1.07131200000 | 1.83701200000  | 2.32857600000  |
| H | -1.23261200000 | -0.17178800000 | -2.76002000000 |
| H | 1.54185300000  | 2.21414500000  | 1.09931100000  |
| H | 4.73391900000  | -2.50235800000 | 0.02835900000  |
| H | -1.80561100000 | -3.32838500000 | 1.05083600000  |
| H | -0.20734800000 | -3.24616600000 | 0.27035300000  |
| H | -0.62813400000 | -2.18068800000 | 1.64277400000  |
| H | -1.55861500000 | -3.18658300000 | -1.79245200000 |
| H | -3.11883300000 | -2.98856400000 | -0.95922100000 |
| H | -2.61818600000 | -1.83318200000 | -2.19656300000 |

-----

### 1 (MeNH<sub>3</sub><sup>+</sup>)

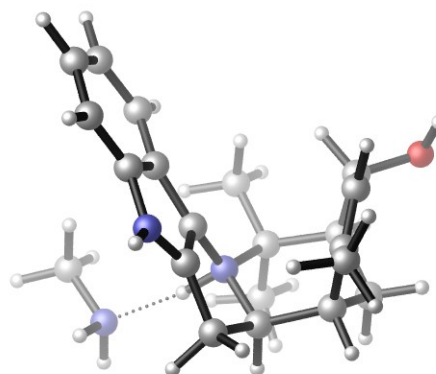

|                                              |                             |                |                |
|----------------------------------------------|-----------------------------|----------------|----------------|
| Zero-point correction=                       | 0.490406 (Hartree/Particle) |                |                |
| Thermal correction to Energy=                | 0.514096                    |                |                |
| Thermal correction to Enthalpy=              | 0.515040                    |                |                |
| Thermal correction to Gibbs Free Energy=     | 0.438573                    |                |                |
| Sum of electronic and zero-point Energies=   | -1057.026219                |                |                |
| Sum of electronic and thermal Energies=      | -1057.002529                |                |                |
| Sum of electronic and thermal Enthalpies=    | -1057.001584                |                |                |
| Sum of electronic and thermal Free Energies= | -1057.078051                |                |                |
| E(RwB97XD) =                                 | -1057.69424792              |                |                |
| C                                            | -0.70893400000              | 0.00317100000  | -0.37575700000 |
| H                                            | 1.19612100000               | -0.73715100000 | 2.33383500000  |
| C                                            | -1.86664200000              | -0.32080100000 | 0.42361200000  |
| C                                            | -2.42437100000              | 0.01942400000  | 1.66928200000  |
| H                                            | -1.95937300000              | 0.74098900000  | 2.32220000000  |
| C                                            | -3.60990200000              | -0.56374600000 | 2.06954000000  |
| C                                            | -4.28043900000              | -1.49649700000 | 1.26505400000  |
| C                                            | -3.77972000000              | -1.84156500000 | 0.02766000000  |
| H                                            | -5.20406100000              | -1.94132000000 | 1.61446300000  |
| C                                            | -2.59325700000              | -1.23903700000 | -0.38491500000 |
| H                                            | -4.29502800000              | -2.54912300000 | -0.61168600000 |
| N                                            | -1.94303200000              | -1.39243900000 | -1.59626400000 |
| C                                            | -0.82370400000              | -0.62845800000 | -1.57032100000 |
| C                                            | 0.18703000000               | -0.21621900000 | -2.57727800000 |

|   |                 |                 |                 |
|---|-----------------|-----------------|-----------------|
| H | -0.237434000000 | 0.500359000000  | -3.288472000000 |
| H | 0.634999000000  | -1.026227000000 | -3.153186000000 |
| C | 1.223816000000  | 0.448392000000  | -1.654613000000 |
| C | 2.357493000000  | -0.497632000000 | -1.212718000000 |
| H | 2.914440000000  | -0.708784000000 | -2.132102000000 |
| C | 3.262396000000  | 0.226008000000  | -0.218492000000 |
| H | 4.107697000000  | -0.409461000000 | 0.048337000000  |
| H | 3.671190000000  | 1.142282000000  | -0.649187000000 |
| C | 1.912594000000  | -1.824806000000 | -0.610654000000 |
| C | 1.658620000000  | -2.992101000000 | -1.524165000000 |
| H | 2.442063000000  | -3.075944000000 | -2.283355000000 |
| H | 1.629546000000  | -3.926242000000 | -0.961596000000 |
| H | 0.702536000000  | -2.902184000000 | -2.048478000000 |
| C | 2.427340000000  | 0.503796000000  | 1.028666000000  |
| H | 3.032934000000  | 1.034986000000  | 1.767367000000  |
| C | 1.253106000000  | 1.458586000000  | 0.717037000000  |
| N | 0.398687000000  | 0.975178000000  | -0.466586000000 |
| C | 0.367674000000  | 1.690963000000  | 1.931307000000  |
| C | 1.795986000000  | 2.832330000000  | 0.282846000000  |
| C | 2.079323000000  | -0.840100000000 | 1.693444000000  |
| O | 3.203456000000  | -1.136283000000 | 2.517064000000  |
| C | 1.820000000000  | -1.945868000000 | 0.711151000000  |
| H | 1.548069000000  | -2.907297000000 | 1.142442000000  |
| H | 3.146286000000  | -2.042042000000 | 2.826768000000  |
| H | 1.671173000000  | 1.323438000000  | -2.127103000000 |
| H | -2.238570000000 | -1.997756000000 | -2.342866000000 |
| H | -4.031851000000 | -0.292173000000 | 3.029692000000  |
| H | 0.961359000000  | 2.190406000000  | 2.699300000000  |
| H | -0.476140000000 | 2.339593000000  | 1.685195000000  |
| H | -0.009398000000 | 0.766567000000  | 2.356690000000  |
| H | 0.980494000000  | 3.553487000000  | 0.190766000000  |
| H | 2.480876000000  | 3.201712000000  | 1.047104000000  |
| H | 2.339521000000  | 2.812825000000  | -0.661296000000 |

|   |                 |                |                 |
|---|-----------------|----------------|-----------------|
| N | -1.230423000000 | 3.008692000000 | -1.510144000000 |
| H | -1.753308000000 | 2.549410000000 | -2.249396000000 |
| H | -0.086265000000 | 1.847420000000 | -0.834911000000 |
| H | -0.814706000000 | 3.831989000000 | -1.933947000000 |
| C | -2.157545000000 | 3.409687000000 | -0.436706000000 |
| H | -2.583310000000 | 2.514510000000 | 0.021137000000  |
| H | -1.604795000000 | 3.956625000000 | 0.329777000000  |
| H | -2.974523000000 | 4.046192000000 | -0.786920000000 |

-----  
**TS<sub>1-2</sub> (MeNH<sub>3</sub><sup>+</sup>)**

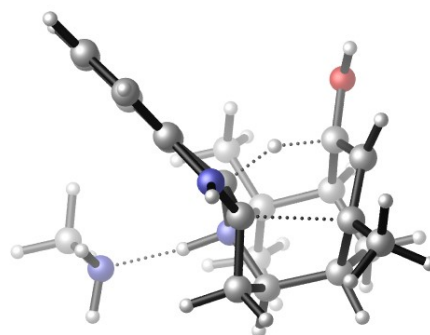

Frequency -1111.9482

Zero-point correction= 0.485227 (Hartree/Particle)

Thermal correction to Energy= 0.507815

Thermal correction to Enthalpy= 0.508760

Thermal correction to Gibbs Free Energy= 0.436129

Sum of electronic and zero-point Energies= -1056.970405

Sum of electronic and thermal Energies= -1056.947816

Sum of electronic and thermal Enthalpies= -1056.946872

Sum of electronic and thermal Free Energies= -1057.019503

E(RwB97XD) = -1057.63137841

|   |                 |                 |                 |
|---|-----------------|-----------------|-----------------|
| C | -0.335421000000 | -0.233436000000 | -0.107903000000 |
| H | 0.391428000000  | -0.499970000000 | 1.020996000000  |
| C | -1.749796000000 | -0.421245000000 | 0.253680000000  |
| C | -2.683068000000 | 0.267023000000  | 1.029215000000  |
| H | -2.452821000000 | 1.231370000000  | 1.460892000000  |

C -3.931288000000 -0.297312000000 1.246117000000  
 C -4.245748000000 -1.559717000000 0.734091000000  
 C -3.329938000000 -2.275231000000 -0.019958000000  
 H -5.222566000000 -1.986381000000 0.928192000000  
 C -2.096959000000 -1.684199000000 -0.275747000000  
 H -3.574151000000 -3.253876000000 -0.416291000000  
 N -1.047669000000 -2.170441000000 -1.043670000000  
 C -0.022579000000 -1.246132000000 -1.058602000000  
 C 0.553309000000 -0.597291000000 -2.287478000000  
 H -0.245978000000 -0.150996000000 -2.890953000000  
 H 1.156311000000 -1.234708000000 -2.934050000000  
 C 1.397435000000 0.438437000000 -1.573610000000  
 C 2.570586000000 -0.329507000000 -0.929445000000  
 H 3.275022000000 -0.522898000000 -1.743858000000  
 C 3.245884000000 0.489512000000 0.166836000000  
 H 4.053551000000 -0.089271000000 0.616194000000  
 H 3.685253000000 1.404725000000 -0.231946000000  
 C 2.108959000000 -1.684107000000 -0.351732000000  
 C 2.495872000000 -2.931247000000 -1.104053000000  
 H 3.585762000000 -3.033554000000 -1.142788000000  
 H 2.092863000000 -3.822353000000 -0.618835000000  
 H 2.144965000000 -2.921890000000 -2.139269000000  
 C 2.172519000000 0.790114000000 1.207489000000  
 H 2.597647000000 1.279051000000 2.086904000000  
 C 1.095012000000 1.734749000000 0.624466000000  
 N 0.418433000000 0.982792000000 -0.517569000000  
 C 0.058885000000 2.097852000000 1.682764000000  
 C 1.665503000000 3.033393000000 0.051292000000  
 C 1.565116000000 -0.543604000000 1.686611000000  
 O 1.330308000000 -0.515577000000 3.047260000000  
 C 1.940105000000 -1.732826000000 1.017197000000  
 H 1.804490000000 -2.689112000000 1.516237000000  
 H 1.054516000000 -1.382102000000 3.354735000000

H 1.729338000000 1.272973000000 -2.188585000000  
 H -1.117668000000 -2.957432000000 -1.664411000000  
 H -4.666666000000 0.240519000000 1.831842000000  
 H 0.542702000000 2.724298000000 2.434249000000  
 H -0.757927000000 2.675969000000 1.244429000000  
 H -0.341376000000 1.227460000000 2.200561000000  
 H 0.852340000000 3.695882000000 -0.256869000000  
 H 2.235597000000 3.546583000000 0.827925000000  
 H 2.327093000000 2.891462000000 -0.801873000000  
 N -1.635294000000 2.385625000000 -1.844512000000  
 H -2.309102000000 1.632115000000 -1.952329000000  
 H -0.267466000000 1.626799000000 -1.013282000000  
 H -1.407054000000 2.697208000000 -2.783399000000  
 C -2.260201000000 3.488245000000 -1.095267000000  
 H -2.597469000000 3.114521000000 -0.127359000000  
 H -1.524020000000 4.275452000000 -0.921933000000  
 H -3.120490000000 3.926124000000 -1.608721000000

-----  
**2 (MeNH<sub>3</sub><sup>+</sup>)**

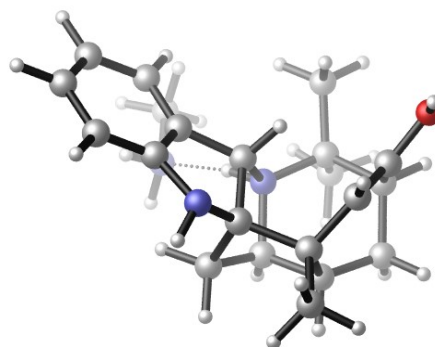

Zero-point correction= 0.492201 (Hartree/Particle)  
 Thermal correction to Energy= 0.514280  
 Thermal correction to Enthalpy= 0.515225  
 Thermal correction to Gibbs Free Energy= 0.444189  
 Sum of electronic and zero-point Energies= -1057.047443  
 Sum of electronic and thermal Energies= -1057.025364

Sum of electronic and thermal Enthalpies= -1057.024420

Sum of electronic and thermal Free Energies= -1057.095455

E(RwB97XD) = -1057.71506145

C -0.363109000000 -0.266745000000 0.302831000000

H 0.095033000000 -0.378271000000 1.277440000000

C -1.851590000000 -0.392590000000 0.442910000000

C -2.822370000000 0.462391000000 0.932432000000

H -2.575175000000 1.481211000000 1.213330000000

C -4.127755000000 -0.006602000000 1.065381000000

C -4.428141000000 -1.327766000000 0.742619000000

C -3.447959000000 -2.208391000000 0.292748000000

H -5.445533000000 -1.684372000000 0.853140000000

C -2.153178000000 -1.730205000000 0.152151000000

H -3.692310000000 -3.239425000000 0.064924000000

N -0.999134000000 -2.439977000000 -0.230303000000

C -0.024183000000 -1.443450000000 -0.613942000000

C -0.213008000000 -0.767832000000 -1.991466000000

H -1.230369000000 -0.406049000000 -2.149721000000

H 0.083913000000 -1.393776000000 -2.832952000000

C 0.809030000000 0.309003000000 -1.705429000000

C 2.063954000000 -0.519477000000 -1.413190000000

H 2.413578000000 -0.910992000000 -2.371261000000

C 3.157309000000 0.301260000000 -0.757490000000

H 4.056798000000 -0.297603000000 -0.608205000000

H 3.434727000000 1.143287000000 -1.395223000000

C 1.520529000000 -1.722939000000 -0.537498000000

C 1.868901000000 -3.076356000000 -1.156701000000

H 2.952812000000 -3.197454000000 -1.222008000000

H 1.476196000000 -3.891708000000 -0.543341000000

H 1.459916000000 -3.179589000000 -2.165919000000

C 2.618461000000 0.758067000000 0.598656000000

H 3.347905000000 1.384682000000 1.117695000000

C 1.343836000000 1.640024000000 0.433277000000

N 0.289154000000 0.903902000000 -0.395851000000

C 0.730578000000 2.023058000000 1.779657000000

C 1.678516000000 2.930455000000 -0.323640000000

C 2.457074000000 -0.502950000000 1.420474000000

O 2.845963000000 -0.328581000000 2.707317000000

C 2.034595000000 -1.649668000000 0.881152000000

H 1.972574000000 -2.552218000000 1.483414000000

H 2.780595000000 -1.154653000000 3.194610000000

H 0.934565000000 1.104839000000 -2.436589000000

H -1.135028000000 -3.208282000000 -0.871892000000

H -4.906205000000 0.650189000000 1.433377000000

H 1.411731000000 2.703265000000 2.293575000000

H -0.218416000000 2.547772000000 1.634805000000

H 0.567301000000 1.174545000000 2.442961000000

H 0.806654000000 3.587053000000 -0.355950000000

H 2.474284000000 3.459892000000 0.202632000000

H 2.015075000000 2.760582000000 -1.345953000000

N -1.780467000000 2.584316000000 -1.375045000000

H -2.578786000000 1.959921000000 -1.292787000000

H -0.456723000000 1.602098000000 -0.678443000000

H -1.669190000000 2.765728000000 -2.367711000000

C -2.070550000000 3.846102000000 -0.675205000000

H -2.156303000000 3.656479000000 0.396884000000

H -1.246561000000 4.545162000000 -0.827055000000

H -2.993240000000 4.326312000000 -1.012283000000

-----

**1 (im, MeNH<sub>3</sub><sup>+</sup>)**

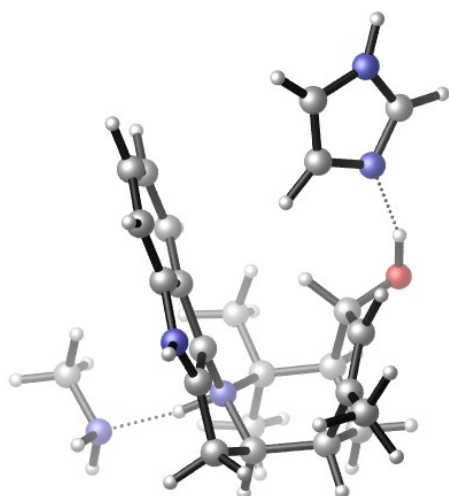

Zero-point correction= 0.564847 (Hartree/Particle)  
 Thermal correction to Energy= 0.593622  
 Thermal correction to Enthalpy= 0.594566  
 Thermal correction to Gibbs Free Energy= 0.504649  
 Sum of electronic and zero-point Energies= -1283.179779  
 Sum of electronic and thermal Energies= -1283.151004  
 Sum of electronic and thermal Enthalpies= -1283.150060  
 Sum of electronic and thermal Free Energies= -1283.239977  
 E(RwB97XD) = -1283.96038984

|   |                 |                 |                 |
|---|-----------------|-----------------|-----------------|
| C | -1.014248000000 | 0.836188000000  | 0.369861000000  |
| H | 0.690022000000  | -0.887216000000 | -0.871091000000 |
| C | 0.074359000000  | 1.726078000000  | 0.055132000000  |
| C | 0.775840000000  | 2.177563000000  | -1.075973000000 |
| H | 0.512307000000  | 1.853824000000  | -2.070266000000 |
| C | 1.824406000000  | 3.061467000000  | -0.920079000000 |
| C | 2.212265000000  | 3.526125000000  | 0.344922000000  |
| C | 1.532779000000  | 3.128263000000  | 1.478137000000  |
| H | 3.042842000000  | 4.216242000000  | 0.431936000000  |
| C | 0.463365000000  | 2.249267000000  | 1.320316000000  |
| H | 1.809989000000  | 3.495059000000  | 2.459830000000  |
| N | -0.381294000000 | 1.752367000000  | 2.296840000000  |
| C | -1.261679000000 | 0.912676000000  | 1.699387000000  |

|   |                 |                 |                 |
|---|-----------------|-----------------|-----------------|
| C | -2.461224000000 | 0.152467000000  | 2.134436000000  |
| H | -3.327799000000 | 0.813872000000  | 2.239220000000  |
| H | -2.352905000000 | -0.400179000000 | 3.066750000000  |
| C | -2.614952000000 | -0.802781000000 | 0.936618000000  |
| C | -1.912024000000 | -2.160948000000 | 1.159275000000  |
| H | -2.546559000000 | -2.672539000000 | 1.891610000000  |
| C | -1.869467000000 | -2.964804000000 | -0.141203000000 |
| H | -1.375337000000 | -3.919677000000 | 0.041747000000  |
| H | -2.871471000000 | -3.186955000000 | -0.513200000000 |
| C | -0.493756000000 | -2.104102000000 | 1.713412000000  |
| C | -0.285743000000 | -2.242927000000 | 3.196050000000  |
| H | -0.840251000000 | -3.101008000000 | 3.589857000000  |
| H | 0.770750000000  | -2.387411000000 | 3.426902000000  |
| H | -0.623635000000 | -1.362478000000 | 3.752648000000  |
| C | -1.064198000000 | -2.147320000000 | -1.146344000000 |
| H | -0.950935000000 | -2.703913000000 | -2.079343000000 |
| C | -1.820954000000 | -0.856998000000 | -1.513624000000 |
| N | -2.049450000000 | -0.002013000000 | -0.258986000000 |
| C | -1.088676000000 | -0.058744000000 | -2.586599000000 |
| C | -3.226023000000 | -1.149220000000 | -2.068556000000 |
| C | 0.379993000000  | -1.914244000000 | -0.633047000000 |
| O | 1.225375000000  | -2.808335000000 | -1.317510000000 |
| C | 0.523315000000  | -2.052460000000 | 0.858762000000  |
| H | 1.548463000000  | -2.091951000000 | 1.217367000000  |
| H | 2.132109000000  | -2.477259000000 | -1.170782000000 |
| H | -3.664453000000 | -0.984823000000 | 0.704951000000  |
| H | -0.309808000000 | 1.942638000000  | 3.281508000000  |
| H | 2.361654000000  | 3.400457000000  | -1.797489000000 |
| H | -1.246291000000 | -0.557802000000 | -3.544269000000 |
| H | -1.485865000000 | 0.955524000000  | -2.671927000000 |
| H | -0.016228000000 | -0.015422000000 | -2.421685000000 |
| H | -3.662193000000 | -0.239685000000 | -2.489836000000 |
| H | -3.140786000000 | -1.881407000000 | -2.872934000000 |

|   |                 |                 |                 |
|---|-----------------|-----------------|-----------------|
| H | -3.924510000000 | -1.550199000000 | -1.335713000000 |
| N | -3.850030000000 | 2.114858000000  | -0.702993000000 |
| H | -3.928018000000 | 2.572794000000  | 0.199687000000  |
| H | -2.813232000000 | 0.688514000000  | -0.516808000000 |
| H | -4.801364000000 | 1.928152000000  | -1.003030000000 |
| C | -3.190496000000 | 3.024527000000  | -1.656237000000 |
| H | -2.154242000000 | 3.177488000000  | -1.346986000000 |
| H | -3.186759000000 | 2.564857000000  | -2.646319000000 |
| H | -3.680377000000 | 3.998969000000  | -1.734657000000 |
| N | 3.553253000000  | -1.308280000000 | -0.671597000000 |
| C | 4.818764000000  | -1.469874000000 | -0.976281000000 |
| C | 3.478256000000  | -0.105068000000 | -0.008398000000 |
| C | 4.716605000000  | 0.457660000000  | 0.082716000000  |
| N | 5.563228000000  | -0.426707000000 | -0.540512000000 |
| H | 5.240482000000  | -2.311805000000 | -1.503152000000 |
| H | 6.558289000000  | -0.323419000000 | -0.650075000000 |
| H | 5.061669000000  | 1.379115000000  | 0.519418000000  |
| H | 2.542461000000  | 0.286012000000  | 0.360846000000  |

-----

### TS<sub>1-2</sub> (im, MeNH<sub>3</sub><sup>+</sup>)

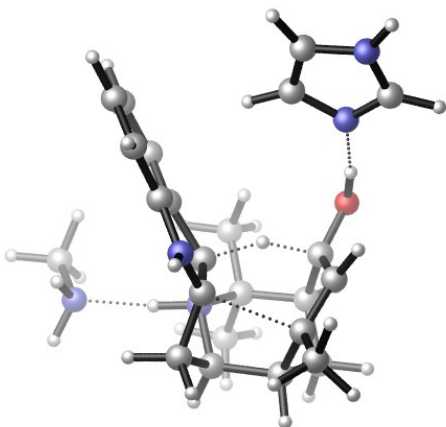

Frequency -1080.5707

Zero-point correction= 0.559005 (Hartree/Particle)

Thermal correction to Energy= 0.586882

|                                              |                |
|----------------------------------------------|----------------|
| Thermal correction to Enthalpy=              | 0.587827       |
| Thermal correction to Gibbs Free Energy=     | 0.500192       |
| Sum of electronic and zero-point Energies=   | -1283.130716   |
| Sum of electronic and thermal Energies=      | -1283.102839   |
| Sum of electronic and thermal Enthalpies=    | -1283.101894   |
| Sum of electronic and thermal Free Energies= | -1283.189529   |
| E(RwB97XD) =                                 | -1283.90370899 |

|   |                 |                 |                 |
|---|-----------------|-----------------|-----------------|
| C | -0.629195000000 | 0.383309000000  | 0.380183000000  |
| H | -0.020967000000 | -0.576511000000 | -0.395238000000 |
| C | 0.189730000000  | 1.599305000000  | 0.251681000000  |
| C | 0.447041000000  | 2.530208000000  | -0.755007000000 |
| H | -0.089947000000 | 2.504419000000  | -1.692940000000 |
| C | 1.413427000000  | 3.505102000000  | -0.550188000000 |
| C | 2.155957000000  | 3.539065000000  | 0.634309000000  |
| C | 1.938020000000  | 2.613236000000  | 1.641874000000  |
| H | 2.912057000000  | 4.303690000000  | 0.768694000000  |
| C | 0.936338000000  | 1.666062000000  | 1.451190000000  |
| H | 2.514515000000  | 2.637856000000  | 2.559283000000  |
| N | 0.502026000000  | 0.682427000000  | 2.321189000000  |
| C | -0.526016000000 | -0.033748000000 | 1.735011000000  |
| C | -1.905777000000 | -0.205960000000 | 2.305575000000  |
| H | -2.340244000000 | 0.767989000000  | 2.562264000000  |
| H | -1.991825000000 | -0.858370000000 | 3.174818000000  |
| C | -2.541443000000 | -0.824853000000 | 1.077410000000  |
| C | -1.981857000000 | -2.258363000000 | 0.966040000000  |
| H | -2.537753000000 | -2.844109000000 | 1.704698000000  |
| C | -2.193787000000 | -2.834946000000 | -0.431035000000 |
| H | -1.767410000000 | -3.837330000000 | -0.483881000000 |
| H | -3.254788000000 | -2.919745000000 | -0.671534000000 |
| C | -0.482950000000 | -2.315590000000 | 1.323015000000  |
| C | -0.105043000000 | -2.915118000000 | 2.652617000000  |
| H | -0.416783000000 | -3.964247000000 | 2.705125000000  |
| H | 0.975849000000  | -2.879319000000 | 2.802713000000  |

H -0.580908000000 -2.405139000000 3.494859000000  
 C -1.468987000000 -1.905950000000 -1.398061000000  
 H -1.470971000000 -2.307729000000 -2.413807000000  
 C -2.156510000000 -0.522102000000 -1.444582000000  
 N -2.023095000000 0.085798000000 -0.051180000000  
 C -1.481597000000 0.387670000000 -2.465142000000  
 C -3.648475000000 -0.587547000000 -1.777883000000  
 C 0.009944000000 -1.790770000000 -0.973459000000  
 O 0.843648000000 -1.756608000000 -2.051794000000  
 C 0.394419000000 -2.377470000000 0.263245000000  
 H 1.446657000000 -2.585097000000 0.430096000000  
 H 1.768449000000 -1.568594000000 -1.750024000000  
 H -3.629683000000 -0.798546000000 1.055706000000  
 H 0.795135000000 0.594905000000 3.277765000000  
 H 1.603909000000 4.239435000000 -1.323263000000  
 H -1.691668000000 -0.003265000000 -3.462244000000  
 H -1.887505000000 1.401033000000 -2.411874000000  
 H -0.398584000000 0.410818000000 -2.355740000000  
 H -4.054488000000 0.421983000000 -1.886127000000  
 H -3.777506000000 -1.101774000000 -2.732049000000  
 H -4.247725000000 -1.115306000000 -1.037452000000  
 N -3.213033000000 2.631488000000 0.276938000000  
 H -2.560128000000 3.057350000000 0.928713000000  
 H -2.570580000000 0.992782000000 -0.005518000000  
 H -4.116013000000 2.631187000000 0.740609000000  
 C -3.280640000000 3.449235000000 -0.944848000000  
 H -2.281692000000 3.523665000000 -1.377099000000  
 H -3.934030000000 2.963982000000 -1.672622000000  
 H -3.652361000000 4.462388000000 -0.767917000000  
 N 3.302638000000 -1.041667000000 -1.092910000000  
 C 4.432559000000 -1.693346000000 -0.945356000000  
 C 3.554497000000 0.252044000000 -0.700637000000  
 C 4.854621000000 0.372629000000 -0.310417000000

N 5.401402000000 -0.877906000000 -0.471528000000  
 H 4.597081000000 -2.735865000000 -1.169358000000  
 H 6.356166000000 -1.138712000000 -0.288531000000  
 H 5.426480000000 1.210793000000 0.049185000000  
 H 2.792851000000 1.014678000000 -0.733714000000

-----

## 2 (im, MeNH<sub>3</sub><sup>+</sup>)

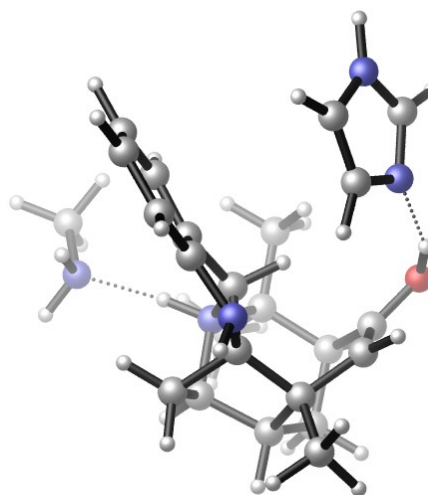

Zero-point correction= 0.565959 (Hartree/Particle)  
 Thermal correction to Energy= 0.592354  
 Thermal correction to Enthalpy= 0.593298  
 Thermal correction to Gibbs Free Energy= 0.511464  
 Sum of electronic and zero-point Energies= -1283.207205  
 Sum of electronic and thermal Energies= -1283.180811  
 Sum of electronic and thermal Enthalpies= -1283.179867  
 Sum of electronic and thermal Free Energies= -1283.261701  
 E(RwB97XD) = -1283.98609819

C -0.071148000000 0.363468000000 0.279241000000  
 H 0.208033000000 -0.532807000000 -0.260294000000  
 C 1.145630000000 1.228080000000 0.418779000000  
 C 1.844956000000 2.006610000000 -0.484267000000  
 H 1.454096000000 2.183850000000 -1.481112000000  
 C 3.066881000000 2.555557000000 -0.098531000000



|   |                 |                 |                 |               |                 |                 |                 |
|---|-----------------|-----------------|-----------------|---------------|-----------------|-----------------|-----------------|
| C | 3.581166000000  | 2.286653000000  | 1.167544000000  | H             | 0.874433000000  | 0.098652000000  | 3.388701000000  |
| C | 2.905041000000  | 1.466706000000  | 2.068048000000  | H             | 3.620981000000  | 3.184703000000  | -0.784437000000 |
| H | 4.530921000000  | 2.719732000000  | 1.459958000000  | H             | -1.243531000000 | -0.481541000000 | -3.428451000000 |
| C | 1.683902000000  | 0.934232000000  | 1.679486000000  | H             | -0.454739000000 | 0.963825000000  | -2.787987000000 |
| H | 3.325220000000  | 1.250634000000  | 3.043694000000  | H             | 0.021711000000  | -0.657347000000 | -2.228609000000 |
| N | 0.870922000000  | 0.026189000000  | 2.381191000000  | H             | -2.720744000000 | 1.819175000000  | -2.459677000000 |
| C | -0.424478000000 | 0.051557000000  | 1.734224000000  | H             | -3.527195000000 | 0.307278000000  | -2.878635000000 |
| C | -1.345088000000 | 1.251163000000  | 2.048789000000  | H             | -3.871145000000 | 1.082810000000  | -1.337156000000 |
| H | -0.838600000000 | 2.213313000000  | 1.950038000000  | N             | -1.035437000000 | 3.644658000000  | -0.831875000000 |
| H | -1.825968000000 | 1.192860000000  | 3.025289000000  | H             | -0.178732000000 | 3.830123000000  | -0.317016000000 |
| C | -2.306941000000 | 0.920424000000  | 0.928879000000  | H             | -1.256355000000 | 1.872293000000  | -0.595012000000 |
| C | -2.734358000000 | -0.506246000000 | 1.291127000000  | H             | -1.756963000000 | 4.201728000000  | -0.385230000000 |
| H | -3.411080000000 | -0.423749000000 | 2.145153000000  | C             | -0.874068000000 | 4.076274000000  | -2.228791000000 |
| C | -3.427122000000 | -1.213920000000 | 0.142605000000  | H             | -0.117449000000 | 3.456956000000  | -2.715370000000 |
| H | -3.751138000000 | -2.210544000000 | 0.445829000000  | H             | -1.814652000000 | 3.936848000000  | -2.764162000000 |
| H | -4.320608000000 | -0.663625000000 | -0.161085000000 | H             | -0.575018000000 | 5.123511000000  | -2.328540000000 |
| C | -1.388943000000 | -1.191677000000 | 1.766619000000  | N             | 1.902300000000  | -2.655219000000 | -1.029071000000 |
| C | -1.509130000000 | -1.759361000000 | 3.180137000000  | C             | 2.729732000000  | -2.571000000000 | -2.045409000000 |
| H | -2.284481000000 | -2.528246000000 | 3.214340000000  | C             | 2.499161000000  | -1.963250000000 | 0.000635000000  |
| H | -0.567625000000 | -2.221652000000 | 3.489024000000  | C             | 3.694694000000  | -1.454578000000 | -0.410671000000 |
| H | -1.769523000000 | -0.988205000000 | 3.911601000000  | N             | 3.828110000000  | -1.852034000000 | -1.718635000000 |
| C | -2.406639000000 | -1.338595000000 | -0.986321000000 | H             | 2.581223000000  | -3.009262000000 | -3.020224000000 |
| H | -2.847042000000 | -1.818781000000 | -1.864233000000 | H             | 4.613909000000  | -1.667188000000 | -2.319867000000 |
| C | -1.919343000000 | 0.062210000000  | -1.468634000000 | H             | 4.435562000000  | -0.857458000000 | 0.093168000000  |
| N | -1.377651000000 | 0.869291000000  | -0.284168000000 | H             | 2.032994000000  | -1.866714000000 | 0.968842000000  |
| C | -0.820631000000 | -0.034392000000 | -2.527425000000 | -----         |                 |                 |                 |
| C | -3.081313000000 | 0.869946000000  | -2.056958000000 | <b>1 (im)</b> |                 |                 |                 |
| C | -1.311099000000 | -2.258160000000 | -0.486281000000 |               |                 |                 |                 |
| O | -0.786522000000 | -3.042537000000 | -1.443722000000 |               |                 |                 |                 |
| C | -0.939306000000 | -2.259521000000 | 0.800518000000  |               |                 |                 |                 |
| H | -0.190012000000 | -2.967342000000 | 1.140971000000  |               |                 |                 |                 |
| H | 0.168417000000  | -3.182365000000 | -1.240649000000 |               |                 |                 |                 |
| H | -3.119774000000 | 1.615546000000  | 0.728761000000  |               |                 |                 |                 |

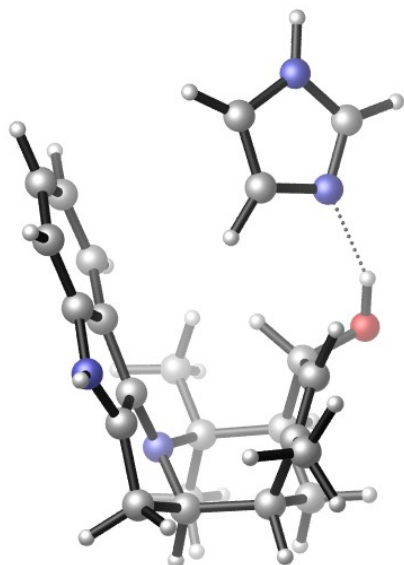

Zero-point correction= 0.482283 (Hartree/Particle)  
 Thermal correction to Energy= 0.506743  
 Thermal correction to Enthalpy= 0.507687  
 Thermal correction to Gibbs Free Energy= 0.428138  
 Sum of electronic and zero-point Energies= -1186.966654  
 Sum of electronic and thermal Energies= -1186.942194  
 Sum of electronic and thermal Enthalpies= -1186.941250  
 Sum of electronic and thermal Free Energies= -1187.020799

E(RwB97XD) = -1187.64851524

|   |                 |                 |                 |
|---|-----------------|-----------------|-----------------|
| C | -0.816175000000 | 1.424289000000  | -0.323320000000 |
| H | 0.163218000000  | -1.218858000000 | -0.594134000000 |
| C | 0.547018000000  | 1.779486000000  | -0.648711000000 |
| C | 1.473221000000  | 1.536713000000  | -1.679289000000 |
| H | 1.205397000000  | 0.948657000000  | -2.542657000000 |
| C | 2.750017000000  | 2.058763000000  | -1.604285000000 |
| C | 3.159205000000  | 2.839785000000  | -0.512897000000 |
| C | 2.274040000000  | 3.132794000000  | 0.506538000000  |
| H | 4.168857000000  | 3.234303000000  | -0.478558000000 |
| C | 0.977877000000  | 2.627272000000  | 0.418671000000  |
| H | 2.567839000000  | 3.756300000000  | 1.344416000000  |
| N | -0.074130000000 | 2.833618000000  | 1.276993000000  |

|   |                 |                 |                 |
|---|-----------------|-----------------|-----------------|
| C | -1.128644000000 | 2.077436000000  | 0.826641000000  |
| C | -2.574919000000 | 1.976645000000  | 1.149879000000  |
| H | -3.111465000000 | 2.867278000000  | 0.797542000000  |
| H | -2.828892000000 | 1.827770000000  | 2.201199000000  |
| C | -2.931135000000 | 0.742813000000  | 0.293005000000  |
| C | -2.889265000000 | -0.584792000000 | 1.103498000000  |
| H | -3.732888000000 | -0.536845000000 | 1.803312000000  |
| C | -3.073868000000 | -1.765961000000 | 0.144613000000  |
| H | -3.047840000000 | -2.703286000000 | 0.705604000000  |
| H | -4.041658000000 | -1.716589000000 | -0.360080000000 |
| C | -1.621713000000 | -0.835094000000 | 1.899074000000  |
| C | -1.569441000000 | -0.413968000000 | 3.341486000000  |
| H | -2.462332000000 | -0.746554000000 | 3.882159000000  |
| H | -0.691661000000 | -0.832782000000 | 3.838311000000  |
| H | -1.518047000000 | 0.674971000000  | 3.443665000000  |
| C | -1.922843000000 | -1.726376000000 | -0.861701000000 |
| H | -1.991833000000 | -2.577118000000 | -1.544882000000 |
| C | -2.008620000000 | -0.423248000000 | -1.707796000000 |
| N | -1.967639000000 | 0.773235000000  | -0.842314000000 |
| C | -0.918512000000 | -0.396719000000 | -2.776546000000 |
| C | -3.338280000000 | -0.370258000000 | -2.488589000000 |
| C | -0.573089000000 | -1.883009000000 | -0.124637000000 |
| O | -0.122679000000 | -3.220316000000 | -0.280293000000 |
| C | -0.615673000000 | -1.489691000000 | 1.325856000000  |
| H | 0.276802000000  | -1.735197000000 | 1.897175000000  |
| H | 0.809515000000  | -3.209338000000 | -0.010906000000 |
| H | -3.944475000000 | 0.841681000000  | -0.102352000000 |
| H | -0.011007000000 | 3.289216000000  | 2.169188000000  |
| H | 3.449620000000  | 1.858010000000  | -2.407865000000 |
| H | -1.154856000000 | -1.143734000000 | -3.537835000000 |
| H | -0.885316000000 | 0.583862000000  | -3.258228000000 |
| H | 0.067637000000  | -0.638236000000 | -2.388071000000 |
| H | -3.312796000000 | 0.471483000000  | -3.184265000000 |

H -3.472754000000 -1.292584000000 -3.060659000000  
H -4.215187000000 -0.245707000000 -1.854660000000  
N 2.594983000000 -2.352884000000 0.394664000000  
C 3.790459000000 -2.864225000000 0.235635000000  
C 2.781863000000 -0.993951000000 0.508653000000  
C 4.107543000000 -0.692411000000 0.416164000000  
N 4.743870000000 -1.899147000000 0.242887000000  
H 4.019922000000 -3.911340000000 0.110566000000  
H 5.733457000000 -2.042069000000 0.137921000000  
H 4.631213000000 0.247780000000 0.440989000000  
H 1.956979000000 -0.310038000000 0.638174000000

-----

**TS<sub>1-2</sub> (im)**

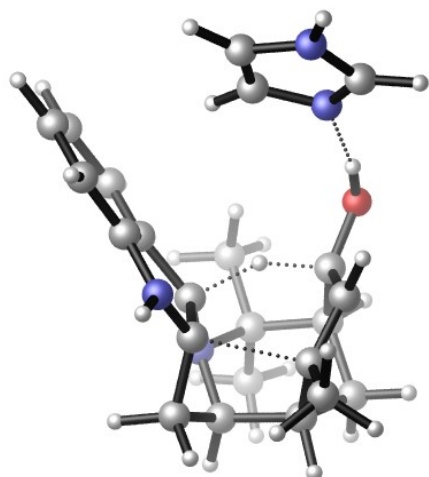

Frequency -1081.1163  
Zero-point correction= 0.477385 (Hartree/Particle)  
Thermal correction to Energy= 0.500537  
Thermal correction to Enthalpy= 0.501481  
Thermal correction to Gibbs Free Energy= 0.425942  
Sum of electronic and zero-point Energies= -1186.909794  
Sum of electronic and thermal Energies= -1186.886642  
Sum of electronic and thermal Enthalpies= -1186.885697  
Sum of electronic and thermal Free Energies= -1186.961237

E(RwB97XD) = -1187.58464109  
C -0.670087000000 0.965426000000 0.276955000000  
H -0.403133000000 -0.199898000000 -0.493607000000  
C 0.553822000000 1.760442000000 0.085674000000  
C 1.071760000000 2.552784000000 -0.936150000000  
H 0.488283000000 2.760919000000 -1.822360000000  
C 2.345835000000 3.096131000000 -0.808166000000  
C 3.120706000000 2.842126000000 0.326033000000  
C 2.631736000000 2.054989000000 1.359774000000  
H 4.111727000000 3.275523000000 0.406822000000  
C 1.344369000000 1.542367000000 1.240651000000  
H 3.226598000000 1.861672000000 2.246047000000  
N 0.633135000000 0.780467000000 2.148509000000  
C -0.636266000000 0.518785000000 1.630042000000  
C -1.943673000000 0.939222000000 2.248236000000  
H -1.948177000000 2.021040000000 2.427640000000  
H -2.238600000000 0.421830000000 3.163073000000  
C -2.799702000000 0.555100000000 1.055011000000  
C -2.778785000000 -0.997378000000 1.042484000000  
H -3.464210000000 -1.334715000000 1.828489000000  
C -3.220135000000 -1.539534000000 -0.314265000000  
H -3.156876000000 -2.630573000000 -0.319013000000  
H -4.255663000000 -1.266941000000 -0.529526000000  
C -1.363108000000 -1.525906000000 1.365962000000  
C -1.154653000000 -2.157972000000 2.721296000000  
H -1.786469000000 -3.046414000000 2.837852000000  
H -0.113305000000 -2.466097000000 2.847337000000  
H -1.408065000000 -1.480159000000 3.541550000000  
C -2.263030000000 -0.952923000000 -1.348317000000  
H -2.445067000000 -1.369679000000 -2.342516000000  
C -2.429411000000 0.594600000000 -1.408381000000  
N -2.054885000000 1.170023000000 -0.092244000000  
C -1.541387000000 1.169145000000 -2.511582000000

```

C -3.868102000000  1.012732000000 -1.731924000000
C -0.824227000000 -1.352808000000 -0.963178000000
O -0.084345000000 -1.706029000000 -2.071457000000
C -0.630691000000 -2.001275000000  0.289554000000
H  0.294104000000 -2.547479000000  0.452387000000
H  0.845493000000 -1.856824000000 -1.802684000000
H -3.817925000000  0.943893000000  1.090691000000
H  0.860444000000  0.725258000000  3.124457000000
H  2.740381000000  3.725170000000 -1.597746000000
H -1.916661000000  0.838438000000 -3.483266000000
H -1.572019000000  2.261524000000 -2.481597000000
H -0.508178000000  0.830310000000 -2.437842000000
H -3.904540000000  2.094361000000 -1.881598000000
H -4.201204000000  0.523308000000 -2.651562000000
H -4.582089000000  0.764561000000 -0.946870000000
N  2.558358000000 -1.837088000000 -1.156736000000
C  3.379990000000 -2.743993000000 -0.689020000000
C  3.124434000000 -0.620564000000 -0.861387000000
C  4.305117000000 -0.804258000000 -0.206185000000
N  4.457604000000 -2.167855000000 -0.102547000000
H  3.243882000000 -3.812910000000 -0.746683000000
H  5.229217000000 -2.651292000000  0.323675000000
H  5.023744000000 -0.107689000000  0.189866000000
H  2.646512000000  0.308821000000 -1.128947000000

```

-----

## 2 (im)

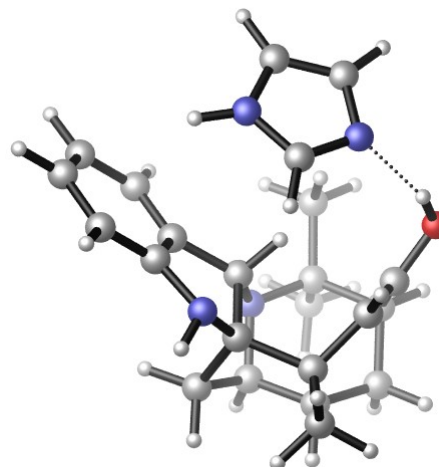

```

Zero-point correction=          0.484165 (Hartree/Particle)
Thermal correction to Energy=          0.506780
Thermal correction to Enthalpy=        0.507724
Thermal correction to Gibbs Free Energy=  0.434513
Sum of electronic and zero-point Energies= -1186.993957
Sum of electronic and thermal Energies=   -1186.971342
Sum of electronic and thermal Enthalpies= -1186.970398
Sum of electronic and thermal Free Energies= -1187.043609
E(RwB97XD) = -1187.67421799
C  0.014474000000  0.568802000000 -0.444064000000
H  0.130105000000 -0.444378000000 -0.069241000000
C  1.408854000000  1.042371000000 -0.762886000000
C  2.243649000000  0.812547000000 -1.834934000000
H  1.862992000000  0.316589000000 -2.721237000000
C  3.578745000000  1.221998000000 -1.758535000000
C  4.052676000000  1.844557000000 -0.607791000000
C  3.213477000000  2.081684000000  0.485223000000
H  5.088225000000  2.163287000000 -0.558045000000
C  1.888492000000  1.678646000000  0.392962000000
H  3.590205000000  2.573170000000  1.376015000000
N  0.888245000000  1.759939000000  1.381563000000
C -0.373153000000  1.506167000000  0.697855000000
C -0.991037000000  2.647948000000 -0.135814000000

```

|   |                 |                 |                 |
|---|-----------------|-----------------|-----------------|
| H | -0.276182000000 | 3.102926000000  | -0.823965000000 |
| H | -1.477564000000 | 3.423378000000  | 0.459464000000  |
| C | -1.984190000000 | 1.714865000000  | -0.807251000000 |
| C | -2.749493000000 | 1.178826000000  | 0.419981000000  |
| H | -3.389619000000 | 1.978384000000  | 0.806944000000  |
| C | -3.588554000000 | -0.039211000000 | 0.078261000000  |
| H | -4.142817000000 | -0.390523000000 | 0.952494000000  |
| H | -4.323053000000 | 0.217076000000  | -0.690062000000 |
| C | -1.597618000000 | 0.893548000000  | 1.466430000000  |
| C | -1.838135000000 | 1.623154000000  | 2.788157000000  |
| H | -2.773829000000 | 1.285845000000  | 3.242260000000  |
| H | -1.028518000000 | 1.417521000000  | 3.495613000000  |
| H | -1.904283000000 | 2.706943000000  | 2.648259000000  |
| C | -2.627237000000 | -1.130783000000 | -0.394082000000 |
| H | -3.171198000000 | -2.030919000000 | -0.696196000000 |
| C | -1.802907000000 | -0.632798000000 | -1.639562000000 |
| N | -1.108414000000 | 0.656313000000  | -1.386125000000 |
| C | -0.781743000000 | -1.689647000000 | -2.071676000000 |
| C | -2.751555000000 | -0.415795000000 | -2.827771000000 |
| C | -1.787313000000 | -1.501595000000 | 0.807263000000  |
| O | -1.473435000000 | -2.815198000000 | 0.880243000000  |
| C | -1.416920000000 | -0.584206000000 | 1.710090000000  |
| H | -0.849543000000 | -0.890483000000 | 2.584730000000  |
| H | -0.603483000000 | -2.904399000000 | 1.320966000000  |
| H | -2.625065000000 | 2.160314000000  | -1.568588000000 |
| H | 0.917164000000  | 2.588260000000  | 1.959825000000  |
| H | 4.246243000000  | 1.058732000000  | -2.596770000000 |
| H | -1.305095000000 | -2.590156000000 | -2.402003000000 |
| H | -0.189935000000 | -1.305003000000 | -2.907211000000 |
| H | -0.102274000000 | -1.993245000000 | -1.274695000000 |
| H | -2.167466000000 | -0.147331000000 | -3.710776000000 |
| H | -3.308757000000 | -1.332004000000 | -3.041784000000 |
| H | -3.475914000000 | 0.381171000000  | -2.655365000000 |

|   |                |                 |                 |
|---|----------------|-----------------|-----------------|
| N | 1.286465000000 | -2.689046000000 | 1.342324000000  |
| C | 1.907250000000 | -1.538507000000 | 1.479208000000  |
| C | 1.983458000000 | -3.371895000000 | 0.372866000000  |
| C | 3.028885000000 | -2.616847000000 | -0.073444000000 |
| N | 2.972502000000 | -1.453245000000 | 0.651139000000  |
| H | 1.607975000000 | -0.724096000000 | 2.121799000000  |
| H | 3.537812000000 | -0.628879000000 | 0.507661000000  |
| H | 3.784579000000 | -2.793884000000 | -0.819517000000 |
| H | 1.684560000000 | -4.357428000000 | 0.052748000000  |

-----

### 1 (HCO<sub>2</sub><sup>-</sup>)

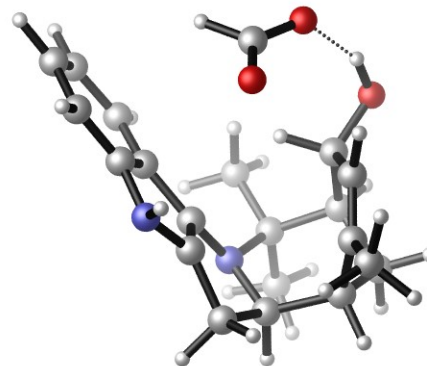

|                                              |                             |                 |                 |
|----------------------------------------------|-----------------------------|-----------------|-----------------|
| Zero-point correction=                       | 0.431103 (Hartree/Particle) |                 |                 |
| Thermal correction to Energy=                | 0.453259                    |                 |                 |
| Thermal correction to Enthalpy=              | 0.454203                    |                 |                 |
| Thermal correction to Gibbs Free Energy=     | 0.381728                    |                 |                 |
| Sum of electronic and zero-point Energies=   | -1150.030491                |                 |                 |
| Sum of electronic and thermal Energies=      | -1150.008334                |                 |                 |
| Sum of electronic and thermal Enthalpies=    | -1150.007390                |                 |                 |
| Sum of electronic and thermal Free Energies= | -1150.079866                |                 |                 |
| E(RwB97XD) =                                 | -1150.65099436              |                 |                 |
| H                                            | 0.144786000000              | -0.122481000000 | 1.295870000000  |
| C                                            | 1.126961000000              | -0.558384000000 | 1.514911000000  |
| C                                            | -0.294710000000             | 0.908909000000  | -0.890072000000 |
| C                                            | -1.660633000000             | 1.105207000000  | -0.433164000000 |
| C                                            | -0.348581000000             | 0.038639000000  | -1.922001000000 |

N 1.016559000000 1.443129000000 -0.739256000000  
 C -2.345268000000 1.889813000000 0.508380000000  
 C -2.437300000000 0.218850000000 -1.226714000000  
 H -1.829463000000 2.619775000000 1.112369000000  
 C -3.709244000000 1.730113000000 0.680784000000  
 C -4.432886000000 0.790957000000 -0.064264000000  
 H -4.221869000000 2.334218000000 1.421916000000  
 C -3.798943000000 0.029065000000 -1.027682000000  
 H -5.494256000000 0.659331000000 0.116217000000  
 H -4.339169000000 -0.706720000000 -1.612548000000  
 N -1.641964000000 -0.378596000000 -2.193187000000  
 H -1.814120000000 -1.352438000000 -2.400139000000  
 C 0.919248000000 0.044046000000 -2.700653000000  
 C 1.843564000000 -1.774045000000 -0.538806000000  
 H 0.828842000000 0.738845000000 -3.547579000000  
 H 1.256355000000 -0.915139000000 -3.094574000000  
 C 1.882873000000 0.598707000000 -1.629081000000  
 C 2.664412000000 -0.557949000000 -0.927751000000  
 H 2.629944000000 1.254102000000 -2.087354000000  
 H 3.428032000000 -0.868562000000 -1.653810000000  
 C 3.332298000000 -0.054315000000 0.355429000000  
 H 3.831371000000 -0.889264000000 0.853677000000  
 H 4.092696000000 0.703702000000 0.147809000000  
 C 2.222300000000 0.509829000000 1.240374000000  
 C 1.849924000000 -2.988491000000 -1.425713000000  
 C 1.206914000000 -1.766476000000 0.627061000000  
 H 2.875924000000 -3.329552000000 -1.618593000000  
 H 1.292513000000 -3.801444000000 -0.956825000000  
 H 1.390509000000 -2.798763000000 -2.402115000000  
 H 2.624701000000 0.797175000000 2.216212000000  
 C 1.632393000000 1.779359000000 0.564122000000  
 C 0.646246000000 2.449492000000 1.515082000000  
 C 2.722699000000 2.833317000000 0.284440000000

H 1.204102000000 2.852263000000 2.364835000000  
 H 0.140686000000 3.278722000000 1.013284000000  
 H -0.093609000000 1.757022000000 1.911730000000  
 H 2.245723000000 3.775589000000 0.002587000000  
 H 3.327021000000 3.000563000000 1.181868000000  
 H 3.396613000000 2.553181000000 -0.525334000000  
 O 1.143119000000 -0.917530000000 2.884399000000  
 H 0.307695000000 -1.413459000000 3.001573000000  
 H 0.598666000000 -2.606680000000 0.946024000000  
 O -1.328636000000 -2.089408000000 2.478105000000  
 C -2.024500000000 -2.009367000000 1.432157000000  
 O -1.883177000000 -2.616317000000 0.354307000000  
 H -2.882903000000 -1.289331000000 1.484486000000

-----

**TS<sub>1-2</sub> (HCO<sub>2</sub><sup>-</sup>)**

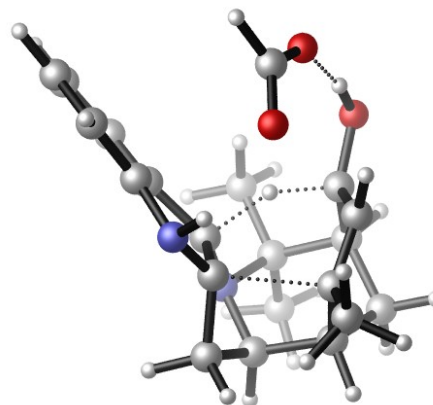

Frequency -950.8931  
 Zero-point correction= 0.426634 (Hartree/Particle)  
 Thermal correction to Energy= 0.448234  
 Thermal correction to Enthalpy= 0.449179  
 Thermal correction to Gibbs Free Energy= 0.378484  
 Sum of electronic and zero-point Energies= -1149.985868  
 Sum of electronic and thermal Energies= -1149.964268  
 Sum of electronic and thermal Enthalpies= -1149.963323  
 Sum of electronic and thermal Free Energies= -1150.034018

E(RwB97XD) = -1150.59968728

|   |                 |                 |                 |
|---|-----------------|-----------------|-----------------|
| H | 0.206366000000  | 0.128525000000  | 0.648710000000  |
| C | 0.923254000000  | -0.458553000000 | 1.535454000000  |
| C | 0.077215000000  | 0.673011000000  | -0.677133000000 |
| C | -1.265742000000 | 1.269650000000  | -0.613316000000 |
| C | -0.046794000000 | -0.498967000000 | -1.462674000000 |
| N | 1.407284000000  | 1.214962000000  | -0.841063000000 |
| C | -1.804194000000 | 2.458794000000  | -0.132212000000 |
| C | -2.133340000000 | 0.271701000000  | -1.104766000000 |
| H | -1.163657000000 | 3.255494000000  | 0.222162000000  |
| C | -3.186561000000 | 2.616639000000  | -0.097279000000 |
| C | -4.031363000000 | 1.585923000000  | -0.509774000000 |
| H | -3.610073000000 | 3.543534000000  | 0.275361000000  |
| C | -3.511936000000 | 0.399681000000  | -1.014324000000 |
| H | -5.107093000000 | 1.713293000000  | -0.443996000000 |
| H | -4.157290000000 | -0.406990000000 | -1.342397000000 |
| N | -1.419196000000 | -0.787205000000 | -1.678260000000 |
| H | -1.733583000000 | -1.698223000000 | -1.341648000000 |
| C | 1.012238000000  | -0.381938000000 | -2.532677000000 |
| C | 1.199594000000  | -1.893476000000 | -0.356472000000 |
| H | 0.719596000000  | 0.367217000000  | -3.278893000000 |
| H | 1.290485000000  | -1.304450000000 | -3.045859000000 |
| C | 2.105692000000  | 0.126531000000  | -1.606133000000 |
| C | 2.471852000000  | -1.105670000000 | -0.735008000000 |
| H | 2.980233000000  | 0.534673000000  | -2.117912000000 |
| H | 3.116848000000  | -1.750516000000 | -1.345178000000 |
| C | 3.198169000000  | -0.691904000000 | 0.544880000000  |
| H | 3.396978000000  | -1.575109000000 | 1.157727000000  |
| H | 4.158620000000  | -0.219342000000 | 0.320174000000  |
| C | 2.266790000000  | 0.264239000000  | 1.288681000000  |
| C | 0.949087000000  | -3.216204000000 | -1.042573000000 |
| C | 0.751296000000  | -1.740908000000 | 0.942615000000  |
| H | 1.744232000000  | -3.934740000000 | -0.804209000000 |

|   |                 |                 |                 |
|---|-----------------|-----------------|-----------------|
| H | -0.003954000000 | -3.629765000000 | -0.702837000000 |
| H | 0.915828000000  | -3.124945000000 | -2.132191000000 |
| H | 2.670725000000  | 0.535540000000  | 2.269095000000  |
| C | 2.074174000000  | 1.558889000000  | 0.441695000000  |
| C | 1.229198000000  | 2.560598000000  | 1.228239000000  |
| C | 3.404751000000  | 2.251757000000  | 0.121828000000  |
| H | 1.798478000000  | 2.903059000000  | 2.097332000000  |
| H | 0.997376000000  | 3.425703000000  | 0.600540000000  |
| H | 0.304113000000  | 2.122983000000  | 1.602605000000  |
| H | 3.202641000000  | 3.219343000000  | -0.345403000000 |
| H | 3.971117000000  | 2.420378000000  | 1.043215000000  |
| H | 4.037476000000  | 1.682363000000  | -0.559535000000 |
| O | 0.370400000000  | -0.198740000000 | 2.772788000000  |
| H | -0.532849000000 | -0.596221000000 | 2.746351000000  |
| H | -0.055298000000 | -2.365814000000 | 1.307568000000  |
| O | -2.095629000000 | -1.271385000000 | 2.369580000000  |
| C | -2.762142000000 | -1.834762000000 | 1.470725000000  |
| O | -2.364601000000 | -2.506305000000 | 0.495115000000  |
| H | -3.872722000000 | -1.719020000000 | 1.565955000000  |

-----

## 2 (HCO<sub>2</sub><sup>-</sup>)

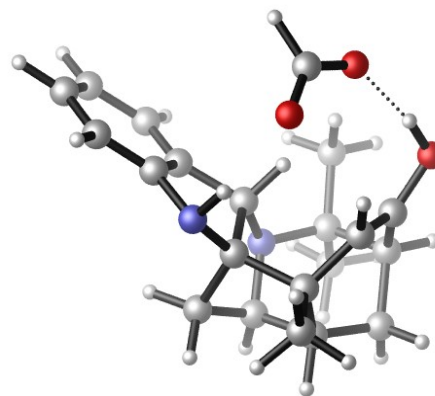

|                                 |                             |
|---------------------------------|-----------------------------|
| Zero-point correction=          | 0.432023 (Hartree/Particle) |
| Thermal correction to Energy=   | 0.453644                    |
| Thermal correction to Enthalpy= | 0.454588                    |

|                                              |                 |   |                 |                 |                 |
|----------------------------------------------|-----------------|---|-----------------|-----------------|-----------------|
| Thermal correction to Gibbs Free Energy=     | 0.383223        | H | 3.926016000000  | 1.124406000000  | -0.780907000000 |
| Sum of electronic and zero-point Energies=   | -1150.065016    | C | 2.718021000000  | 0.034609000000  | 0.685122000000  |
| Sum of electronic and thermal Energies=      | -1150.043395    | C | 0.962902000000  | -1.511221000000 | -2.906546000000 |
| Sum of electronic and thermal Enthalpies=    | -1150.042451    | C | 1.306400000000  | -1.675350000000 | -0.443931000000 |
| Sum of electronic and thermal Free Energies= | -1150.113815    | H | 1.948112000000  | -1.929408000000 | -3.138362000000 |
| E(RwB97XD) =                                 | -1150.68407877  | H | 0.251912000000  | -2.338287000000 | -2.830891000000 |
| H                                            | -0.155724000000 | H | 0.652140000000  | -0.872158000000 | -3.738886000000 |
| C                                            | 1.960401000000  | H | 3.530372000000  | -0.073772000000 | 1.412588000000  |
| C                                            | -0.315214000000 | C | 1.848958000000  | 1.272182000000  | 1.121941000000  |
| C                                            | -1.768252000000 | C | 1.238848000000  | 1.043187000000  | 2.508769000000  |
| C                                            | -0.297966000000 | C | 2.742511000000  | 2.518932000000  | 1.230769000000  |
| N                                            | 0.771584000000  | H | 2.037732000000  | 0.981862000000  | 3.253203000000  |
| C                                            | -2.438181000000 | H | 0.587314000000  | 1.885800000000  | 2.760966000000  |
| C                                            | -2.471222000000 | H | 0.665309000000  | 0.119949000000  | 2.583315000000  |
| H                                            | -1.882757000000 | H | 2.152813000000  | 3.349759000000  | 1.626680000000  |
| C                                            | -3.834877000000 | H | 3.580243000000  | 2.327930000000  | 1.908789000000  |
| C                                            | -4.531133000000 | H | 3.154728000000  | 2.832901000000  | 0.270376000000  |
| H                                            | -4.378945000000 | O | 1.975448000000  | -1.975348000000 | 1.809031000000  |
| C                                            | -3.855354000000 | H | 1.083204000000  | -2.413033000000 | 1.889206000000  |
| H                                            | -5.616220000000 | H | 0.739682000000  | -2.599898000000 | -0.415999000000 |
| H                                            | -4.394256000000 | O | -0.548660000000 | -2.681460000000 | 2.059257000000  |
| N                                            | -1.612262000000 | C | -1.533476000000 | -2.828378000000 | 1.292368000000  |
| H                                            | -1.616549000000 | O | -1.548063000000 | -2.980040000000 | 0.056159000000  |
| C                                            | -0.033427000000 | H | -2.528172000000 | -2.818640000000 | 1.803160000000  |
| C                                            | 1.025125000000  |   |                 |                 |                 |
| H                                            | -0.824890000000 |   |                 |                 |                 |
| H                                            | 0.151526000000  |   |                 |                 |                 |
| C                                            | 1.233642000000  |   |                 |                 |                 |
| C                                            | 2.073947000000  |   |                 |                 |                 |
| H                                            | 1.732269000000  |   |                 |                 |                 |
| H                                            | 2.415128000000  |   |                 |                 |                 |
| C                                            | 3.266706000000  |   |                 |                 |                 |
| H                                            | 3.853792000000  |   |                 |                 |                 |

-----

**1 (HCO<sub>2</sub><sup>-</sup>,MeOH)**



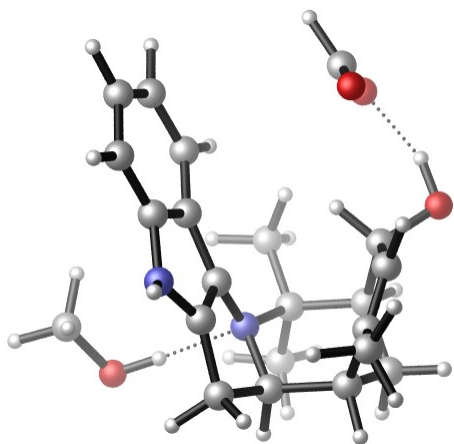

Zero-point correction= 0.484610 (Hartree/Particle)  
 Thermal correction to Energy= 0.512341  
 Thermal correction to Enthalpy= 0.513285  
 Thermal correction to Gibbs Free Energy= 0.424872  
 Sum of electronic and zero-point Energies= -1265.727541  
 Sum of electronic and thermal Energies= -1265.699810  
 Sum of electronic and thermal Enthalpies= -1265.698866  
 Sum of electronic and thermal Free Energies= -1265.787279  
 E(RwB97XD) = -1266.42199964

|   |                 |                 |                 |
|---|-----------------|-----------------|-----------------|
| H | 0.360900000000  | -1.733896000000 | 0.338082000000  |
| C | 1.405132000000  | -1.868995000000 | 0.037346000000  |
| C | -0.355317000000 | 0.947669000000  | -0.124425000000 |
| C | -1.703577000000 | 0.452898000000  | 0.060391000000  |
| C | -0.347604000000 | 1.671978000000  | -1.269542000000 |
| N | 0.879016000000  | 1.140792000000  | 0.575597000000  |
| C | -2.397999000000 | -0.353809000000 | 0.974299000000  |
| C | -2.433770000000 | 0.953114000000  | -1.053877000000 |
| H | -1.902908000000 | -0.791750000000 | 1.825782000000  |
| C | -3.732670000000 | -0.641947000000 | 0.763028000000  |
| C | -4.420578000000 | -0.149674000000 | -0.353388000000 |
| H | -4.245137000000 | -1.292665000000 | 1.462123000000  |
| C | -3.774610000000 | 0.651461000000  | -1.275246000000 |
| H | -5.462495000000 | -0.410825000000 | -0.503251000000 |

|   |                 |                 |                 |
|---|-----------------|-----------------|-----------------|
| H | -4.290962000000 | 1.035807000000  | -2.149141000000 |
| N | -1.606924000000 | 1.750625000000  | -1.823057000000 |
| H | -1.787179000000 | 1.947850000000  | -2.791856000000 |
| C | 0.921581000000  | 2.419254000000  | -1.460805000000 |
| C | 1.861466000000  | -0.485098000000 | -1.999627000000 |
| H | 0.807238000000  | 3.463406000000  | -1.139200000000 |
| H | 1.335083000000  | 2.415056000000  | -2.472284000000 |
| C | 1.818961000000  | 1.637586000000  | -0.477873000000 |
| C | 2.642001000000  | 0.505452000000  | -1.152614000000 |
| H | 2.532955000000  | 2.317506000000  | -0.006458000000 |
| H | 3.372610000000  | 1.014868000000  | -1.796434000000 |
| C | 3.370732000000  | -0.282863000000 | -0.059568000000 |
| H | 3.968622000000  | -1.075879000000 | -0.516228000000 |
| H | 4.054271000000  | 0.361938000000  | 0.501441000000  |
| C | 2.304562000000  | -0.896747000000 | 0.848322000000  |
| C | 1.689318000000  | -0.206331000000 | -3.468424000000 |
| C | 1.387022000000  | -1.594708000000 | -1.436917000000 |
| H | 2.638902000000  | 0.081433000000  | -3.937049000000 |
| H | 1.304542000000  | -1.089371000000 | -3.983481000000 |
| H | 0.980192000000  | 0.610487000000  | -3.647129000000 |
| H | 2.776454000000  | -1.510141000000 | 1.620254000000  |
| C | 1.505184000000  | 0.221756000000  | 1.562507000000  |
| C | 0.475808000000  | -0.372537000000 | 2.523768000000  |
| C | 2.431192000000  | 1.091405000000  | 2.439863000000  |
| H | 1.000083000000  | -0.732200000000 | 3.412770000000  |
| H | -0.236303000000 | 0.395325000000  | 2.840670000000  |
| H | -0.055539000000 | -1.229524000000 | 2.114257000000  |
| H | 1.827698000000  | 1.768324000000  | 3.050084000000  |
| H | 3.013272000000  | 0.447328000000  | 3.104992000000  |
| H | 3.134266000000  | 1.700389000000  | 1.871654000000  |
| O | 1.752443000000  | -3.205957000000 | 0.312121000000  |
| H | 0.927636000000  | -3.594527000000 | 0.692855000000  |
| H | 0.843297000000  | -2.339221000000 | -2.011846000000 |

O -0.665714000000 -3.697322000000 1.381519000000  
 C -1.574754000000 -3.683994000000 0.503099000000  
 O -1.469853000000 -3.479488000000 -0.711853000000  
 H -2.607237000000 -3.878698000000 0.899508000000  
 C -1.348119000000 3.653870000000 1.499068000000  
 H -1.750174000000 4.575987000000 1.927610000000  
 H -1.587643000000 3.634055000000 0.427011000000  
 H -1.856164000000 2.802125000000 1.968804000000  
 O 0.042083000000 3.641143000000 1.734381000000  
 H 0.383624000000 2.781436000000 1.423015000000

-----

### TS<sub>1-2</sub> (HCO<sub>2</sub><sup>-</sup>,MeOH)

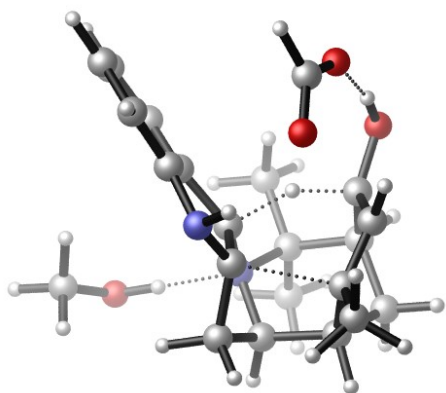

Frequency -956.7609

Zero-point correction= 0.480651 (Hartree/Particle)

Thermal correction to Energy= 0.506827

Thermal correction to Enthalpy= 0.507771

Thermal correction to Gibbs Free Energy= 0.425444

Sum of electronic and zero-point Energies= -1265.680385

Sum of electronic and thermal Energies= -1265.654209

Sum of electronic and thermal Enthalpies= -1265.653265

Sum of electronic and thermal Free Energies= -1265.735592

E(RwB97XD) = -1266.36750836

H -0.012070000000 -0.574565000000 0.728100000000

C 0.422736000000 -1.656433000000 1.273726000000

C 0.154749000000 0.488392000000 -0.211654000000

C -0.992710000000 1.353874000000 0.100333000000

C -0.144280000000 -0.140975000000 -1.442693000000

N 1.593481000000 0.662999000000 -0.109501000000

C -1.276558000000 2.323247000000 1.057024000000

C -2.003147000000 0.954277000000 -0.798300000000

H -0.510555000000 2.678086000000 1.733476000000

C -2.565460000000 2.840639000000 1.137749000000

C -3.574842000000 2.373341000000 0.295305000000

H -2.790641000000 3.601392000000 1.877595000000

C -3.304570000000 1.420529000000 -0.679235000000

H -4.581885000000 2.765108000000 0.394830000000

H -4.078513000000 1.054707000000 -1.343981000000

N -1.502115000000 0.087380000000 -1.777218000000

H -2.073532000000 -0.751832000000 -1.886869000000

C 1.042680000000 0.112672000000 -2.339721000000

C 0.584840000000 -2.175350000000 -1.055904000000

H 1.044926000000 1.153728000000 -2.685953000000

H 1.149249000000 -0.544467000000 -3.204502000000

C 2.099834000000 -0.144502000000 -1.277789000000

C 2.044639000000 -1.675713000000 -1.036398000000

H 3.103275000000 0.192479000000 -1.544918000000

H 2.588890000000 -2.146990000000 -1.864092000000

C 2.681557000000 -2.058481000000 0.299659000000

H 2.582742000000 -3.135317000000 0.458552000000

H 3.747464000000 -1.815894000000 0.314641000000

C 1.921150000000 -1.295672000000 1.383378000000

C 0.110359000000 -2.955279000000 -2.259004000000

C 0.020685000000 -2.461087000000 0.171567000000

H 0.667693000000 -3.895976000000 -2.357611000000

H -0.950858000000 -3.191303000000 -2.146491000000

H 0.243111000000 -2.405510000000 -3.195312000000

H 2.250485000000 -1.587887000000 2.385207000000

|   |                 |                 |                 |
|---|-----------------|-----------------|-----------------|
| C | 2.158901000000  | 0.231578000000  | 1.203494000000  |
| C | 1.485382000000  | 0.999175000000  | 2.340412000000  |
| C | 3.646023000000  | 0.607140000000  | 1.227913000000  |
| H | 2.004637000000  | 0.772783000000  | 3.275882000000  |
| H | 1.555316000000  | 2.074840000000  | 2.156618000000  |
| H | 0.442314000000  | 0.714099000000  | 2.475128000000  |
| H | 3.746169000000  | 1.695543000000  | 1.232996000000  |
| H | 4.113753000000  | 0.209039000000  | 2.133501000000  |
| H | 4.203734000000  | 0.229720000000  | 0.370560000000  |
| O | -0.207576000000 | -1.800767000000 | 2.490871000000  |
| H | -1.170088000000 | -1.872750000000 | 2.281056000000  |
| H | -0.951752000000 | -2.936853000000 | 0.216901000000  |
| O | -2.774929000000 | -1.843234000000 | 1.617556000000  |
| C | -3.440834000000 | -1.788960000000 | 0.557779000000  |
| O | -3.088514000000 | -2.055436000000 | -0.611006000000 |
| H | -4.503278000000 | -1.457992000000 | 0.686165000000  |
| C | 1.205377000000  | 3.923049000000  | -1.330050000000 |
| H | 1.355653000000  | 5.004395000000  | -1.395717000000 |
| H | 1.261910000000  | 3.513009000000  | -2.349836000000 |
| H | 0.195377000000  | 3.735780000000  | -0.944743000000 |
| O | 2.203383000000  | 3.396147000000  | -0.490197000000 |
| H | 2.008921000000  | 2.443530000000  | -0.357487000000 |

-----

## 2 (HCO<sub>2</sub><sup>-</sup>, MeOH)

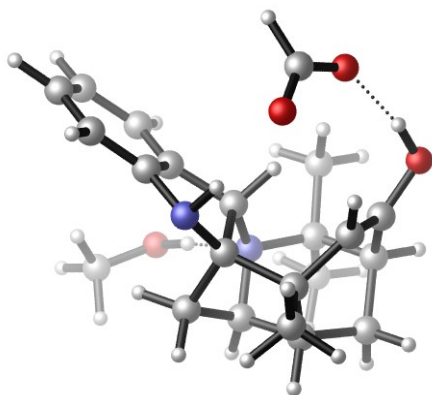

|                                              |                 |                    |                 |
|----------------------------------------------|-----------------|--------------------|-----------------|
| Zero-point correction=                       | 0.487239        | (Hartree/Particle) |                 |
| Thermal correction to Energy=                | 0.512886        |                    |                 |
| Thermal correction to Enthalpy=              | 0.513830        |                    |                 |
| Thermal correction to Gibbs Free Energy=     | 0.433336        |                    |                 |
| Sum of electronic and zero-point Energies=   | -1265.759082    |                    |                 |
| Sum of electronic and thermal Energies=      | -1265.733434    |                    |                 |
| Sum of electronic and thermal Enthalpies=    | -1265.732490    |                    |                 |
| Sum of electronic and thermal Free Energies= | -1265.812985    |                    |                 |
| E(RwB97XD) =                                 | -1266.45262576  |                    |                 |
| H                                            | 0.083201000000  | -0.589998000000    | 0.808794000000  |
| C                                            | 2.392733000000  | -0.999092000000    | 0.664909000000  |
| C                                            | -0.313743000000 | 0.122448000000     | 0.090129000000  |
| C                                            | -1.815255000000 | 0.071691000000     | 0.221168000000  |
| C                                            | -0.144603000000 | -0.395373000000    | -1.341040000000 |
| N                                            | 0.438533000000  | 1.398250000000     | 0.114968000000  |
| C                                            | -2.689868000000 | 0.661739000000     | 1.111295000000  |
| C                                            | -2.265797000000 | -0.876735000000    | -0.709270000000 |
| H                                            | -2.333362000000 | 1.402461000000     | 1.819721000000  |
| C                                            | -4.037991000000 | 0.296791000000     | 1.073326000000  |
| C                                            | -4.478637000000 | -0.662149000000    | 0.167049000000  |
| H                                            | -4.742013000000 | 0.757084000000     | 1.758547000000  |
| C                                            | -3.596938000000 | -1.257328000000    | -0.736660000000 |
| H                                            | -5.526102000000 | -0.946892000000    | 0.155004000000  |
| H                                            | -3.938693000000 | -1.996663000000    | -1.452232000000 |
| N                                            | -1.231992000000 | -1.344607000000    | -1.573137000000 |
| H                                            | -0.954619000000 | -2.283104000000    | -1.261281000000 |
| C                                            | -0.275514000000 | 0.945749000000     | -2.088940000000 |
| C                                            | 1.354147000000  | -0.793127000000    | -1.583772000000 |
| H                                            | -1.246697000000 | 1.421020000000     | -1.942455000000 |
| H                                            | -0.065416000000 | 0.870571000000     | -3.157326000000 |
| C                                            | 0.860296000000  | 1.587068000000     | -1.309821000000 |
| C                                            | 2.019237000000  | 0.639032000000     | -1.667213000000 |
| H                                            | 1.062104000000  | 2.640206000000     | -1.515979000000 |

|   |                 |                 |                 |
|---|-----------------|-----------------|-----------------|
| H | 2.313012000000  | 0.835658000000  | -2.704429000000 |
| C | 3.213900000000  | 0.813318000000  | -0.745075000000 |
| H | 4.024536000000  | 0.137895000000  | -1.032194000000 |
| H | 3.597815000000  | 1.835926000000  | -0.816280000000 |
| C | 2.744174000000  | 0.473454000000  | 0.670140000000  |
| C | 1.518272000000  | -1.572879000000 | -2.889527000000 |
| C | 1.889649000000  | -1.590238000000 | -0.425125000000 |
| H | 2.582343000000  | -1.694754000000 | -3.117242000000 |
| H | 1.074434000000  | -2.567650000000 | -2.797581000000 |
| H | 1.038766000000  | -1.064405000000 | -3.731617000000 |
| H | 3.550596000000  | 0.613868000000  | 1.398224000000  |
| C | 1.568223000000  | 1.425692000000  | 1.091558000000  |
| C | 1.036993000000  | 1.066702000000  | 2.482854000000  |
| C | 2.078996000000  | 2.874602000000  | 1.167202000000  |
| H | 1.818779000000  | 1.247007000000  | 3.225587000000  |
| H | 0.178584000000  | 1.702986000000  | 2.719659000000  |
| H | 0.742458000000  | 0.022239000000  | 2.579545000000  |
| H | 1.296802000000  | 3.525194000000  | 1.564459000000  |
| H | 2.948756000000  | 2.926616000000  | 1.828850000000  |
| H | 2.374154000000  | 3.273755000000  | 0.195601000000  |
| O | 2.598181000000  | -1.641060000000 | 1.834971000000  |
| H | 1.860797000000  | -2.306896000000 | 1.927374000000  |
| H | 1.612506000000  | -2.637929000000 | -0.380595000000 |
| O | 0.368239000000  | -3.003709000000 | 2.101970000000  |
| C | -0.521623000000 | -3.458182000000 | 1.339519000000  |
| O | -0.481314000000 | -3.633426000000 | 0.106856000000  |
| H | -1.475591000000 | -3.737957000000 | 1.850371000000  |
| C | -2.079318000000 | 3.772294000000  | -0.448583000000 |
| H | -2.682410000000 | 4.669515000000  | -0.281795000000 |
| H | -1.579095000000 | 3.876977000000  | -1.423403000000 |
| H | -2.756491000000 | 2.908914000000  | -0.502339000000 |
| O | -1.162049000000 | 3.661617000000  | 0.608395000000  |
| H | -0.633378000000 | 2.842628000000  | 0.469941000000  |

-----  
**1 (HCO<sub>2</sub><sup>-</sup>,HCO<sub>2</sub>H)**

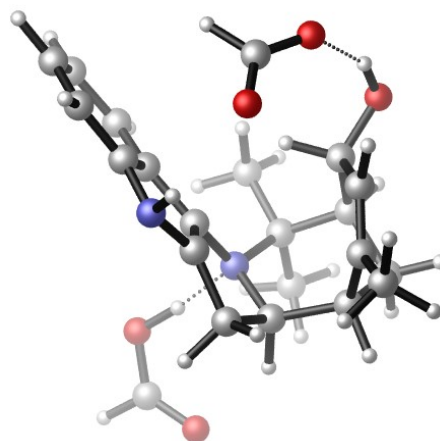

|                                              |                             |                 |                 |
|----------------------------------------------|-----------------------------|-----------------|-----------------|
| Zero-point correction=                       | 0.466960 (Hartree/Particle) |                 |                 |
| Thermal correction to Energy=                | 0.494143                    |                 |                 |
| Thermal correction to Enthalpy=              | 0.495087                    |                 |                 |
| Thermal correction to Gibbs Free Energy=     | 0.409465                    |                 |                 |
| Sum of electronic and zero-point Energies=   | -1339.787782                |                 |                 |
| Sum of electronic and thermal Energies=      | -1339.760599                |                 |                 |
| Sum of electronic and thermal Enthalpies=    | -1339.759655                |                 |                 |
| Sum of electronic and thermal Free Energies= | -1339.845277                |                 |                 |
| E(RwB97XD) =                                 | -1340.47529244              |                 |                 |
| H                                            | -0.822212000000             | -0.800668000000 | 1.118819000000  |
| C                                            | -0.345254000000             | -1.773519000000 | 1.280139000000  |
| C                                            | 0.041201000000              | 0.861122000000  | -0.317005000000 |
| C                                            | -1.034802000000             | 1.750347000000  | 0.083353000000  |
| C                                            | -0.235536000000             | 0.435171000000  | -1.563591000000 |
| N                                            | 1.360018000000              | 0.446932000000  | 0.100159000000  |
| C                                            | -1.344390000000             | 2.604782000000  | 1.151311000000  |
| C                                            | -1.967085000000             | 1.667257000000  | -0.983014000000 |
| H                                            | -0.651021000000             | 2.764652000000  | 1.962904000000  |
| C                                            | -2.560895000000             | 3.266256000000  | 1.170813000000  |
| C                                            | -3.499014000000             | 3.095865000000  | 0.145924000000  |
| H                                            | -2.792207000000             | 3.921587000000  | 2.003941000000  |

C -3.205867000000 2.293886000000 -0.942334000000  
H -4.457679000000 3.600060000000 0.202068000000  
H -3.914381000000 2.148034000000 -1.749386000000  
N -1.454803000000 0.899322000000 -2.023808000000  
H -2.103686000000 0.206037000000 -2.395022000000  
C 0.964797000000 -0.141262000000 -2.227122000000  
C 0.331662000000 -2.655481000000 -0.947046000000  
H 1.455059000000 0.638574000000 -2.823418000000  
H 0.785201000000 -0.992346000000 -2.881049000000  
C 1.820041000000 -0.518372000000 -0.996756000000  
C 1.702562000000 -2.049401000000 -0.709506000000  
H 2.872854000000 -0.290054000000 -1.169847000000  
H 2.415202000000 -2.512569000000 -1.403213000000  
C 2.068729000000 -2.397166000000 0.734122000000  
H 1.893035000000 -3.462367000000 0.900875000000  
H 3.120611000000 -2.200953000000 0.951462000000  
C 1.159509000000 -1.551528000000 1.620570000000  
C 0.089974000000 -3.465270000000 -2.190151000000  
C -0.577063000000 -2.549841000000 0.014438000000  
H 0.749056000000 -4.343651000000 -2.209834000000  
H -0.946234000000 -3.806265000000 -2.228286000000  
H 0.293313000000 -2.904930000000 -3.109436000000  
H 1.279774000000 -1.836528000000 2.669637000000  
C 1.591448000000 -0.067396000000 1.492746000000  
C 0.854743000000 0.767701000000 2.533059000000  
C 3.095488000000 0.112399000000 1.779871000000  
H 1.202227000000 0.459778000000 3.522804000000  
H 1.091023000000 1.827148000000 2.408218000000  
H -0.224417000000 0.626680000000 2.505266000000  
H 3.307312000000 1.165458000000 1.981481000000  
H 3.380265000000 -0.467951000000 2.662252000000  
H 3.731064000000 -0.188248000000 0.946929000000  
O -0.992842000000 -2.391907000000 2.380164000000

H -1.938076000000 -2.357281000000 2.143488000000  
H -1.578508000000 -2.950902000000 -0.096421000000  
O -3.407120000000 -1.900779000000 0.972105000000  
C -3.620079000000 -1.095291000000 0.034886000000  
O -3.332958000000 -1.211232000000 -1.176237000000  
H -4.134685000000 -0.143438000000 0.327176000000  
H 2.217641000000 1.767925000000 -0.115741000000  
O 2.686735000000 2.689872000000 -0.246769000000  
O 4.413983000000 1.572379000000 -1.166802000000  
C 3.862897000000 2.586907000000 -0.804881000000  
H 4.332184000000 3.578790000000 -0.918778000000

-----

### TS<sub>1-2</sub> (HCO<sub>2</sub><sup>-</sup>;HCO<sub>2</sub>H)

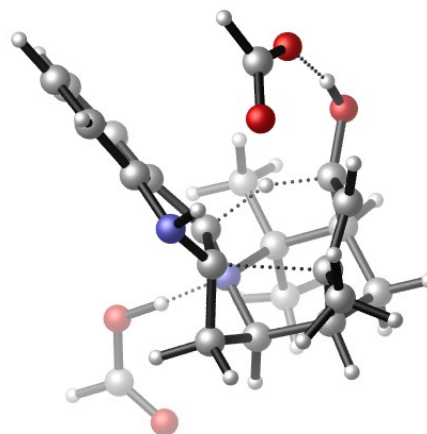

Frequency -972.6482

Zero-point correction= 0.461986 (Hartree/Particle)

Thermal correction to Energy= 0.487915

Thermal correction to Enthalpy= 0.488859

Thermal correction to Gibbs Free Energy= 0.407383

Sum of electronic and zero-point Energies= -1339.745570

Sum of electronic and thermal Energies= -1339.719641

Sum of electronic and thermal Enthalpies= -1339.718697

Sum of electronic and thermal Free Energies= -1339.800173

E(RwB97XD) = -1340.42652891

H -0.45387000000 0.49514100000 0.73830400000  
 C -0.40672100000 1.64388700000 1.31811300000  
 C 0.09042100000 0.45829300000 -0.17406000000  
 C -0.78365900000 1.62209000000 0.03387700000  
 C -0.25757000000 0.08591900000 -1.43124000000  
 N 1.51038900000 0.21260600000 0.06651900000  
 C -0.87244400000 2.64846900000 0.96859600000  
 C -1.78244000000 1.50041200000 -0.95400500000  
 H -0.10293200000 2.79022000000 1.71547300000  
 C -1.97091700000 3.50114900000 0.93839800000  
 C -2.99180400000 3.31553400000 0.00549800000  
 H -2.04224100000 4.30669700000 1.66142400000  
 C -2.90980100000 2.30925700000 -0.94864500000  
 H -3.85691300000 3.97038500000 0.01828100000  
 H -3.69340800000 2.15830300000 -1.68196000000  
 N -1.45797300000 0.50860500000 -1.88720700000  
 H -2.22994400000 0.13435400000 -2.06649000000  
 C 1.02875800000 0.20920300000 -2.21056300000  
 C -0.18400200000 2.24303800000 -0.98746200000  
 H 1.36706100000 0.77637100000 -2.55266300000  
 H 1.01847600000 0.88928500000 -3.06356700000  
 C 1.86773600000 0.73996400000 -1.05982600000  
 C 1.34884700000 2.17973200000 -0.82612400000  
 H 2.94340000000 0.69599500000 -1.22755700000  
 H 1.81025800000 2.80493800000 -1.59981700000  
 C 1.72502900000 2.69745300000 0.56170700000  
 H 1.31319000000 3.69934100000 0.70570100000  
 H 2.80999000000 2.76121200000 0.67841000000  
 C 1.11414900000 1.72787300000 1.57137700000  
 C -0.74878000000 2.88034000000 -2.23446100000  
 C -0.91991700000 2.31992200000 0.17719300000  
 H -0.47719900000 3.94277000000 -2.28529800000  
 H -1.83881000000 2.80155300000 -2.22479800000

H -0.37771600000 2.41217000000 -3.15069100000  
 H 1.25131300000 2.07958700000 2.59848200000  
 C 1.79909000000 0.34054800000 1.43211100000  
 C 1.26666500000 0.61140700000 2.50220100000  
 C 3.32127500000 0.41894200000 1.60665200000  
 H 1.61021000000 0.26568600000 3.48103700000  
 H 1.65649000000 1.61991700000 2.33787100000  
 H 0.17782300000 0.63862500000 2.53360000000  
 H 3.73398200000 0.58730800000 1.71268000000  
 H 3.55680000000 0.98298700000 2.51399300000  
 H 3.83307300000 0.88904500000 0.76798200000  
 O -1.16073600000 1.57240600000 2.46911200000  
 H -2.08069300000 1.37018200000 2.16901000000  
 H -1.98772500000 2.49690800000 0.12669800000  
 O -3.54005300000 0.90081300000 1.36971600000  
 C -4.06282200000 0.68927600000 0.25061600000  
 O -3.69109600000 1.07137900000 -0.87913700000  
 H -4.99776300000 0.07327400000 0.27748600000  
 H 2.33881200000 1.52308200000 -0.15529800000  
 O 2.85329700000 2.43082500000 -0.26663300000  
 O 4.50623700000 1.25482000000 -1.24845700000  
 C 4.00996600000 2.28585600000 -0.85354400000  
 H 4.52388400000 3.25706300000 -0.95874200000

-----  
**2 (HCO<sub>2</sub><sup>-</sup>,HCO<sub>2</sub>H)**

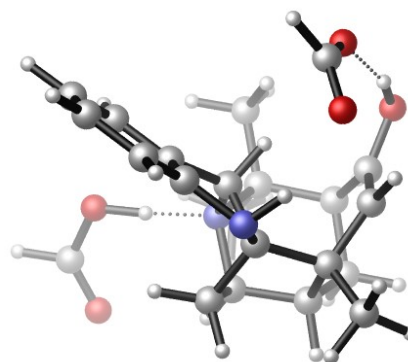

|                                              |                             |                 |                 |                 |                 |                 |                 |
|----------------------------------------------|-----------------------------|-----------------|-----------------|-----------------|-----------------|-----------------|-----------------|
| Zero-point correction=                       | 0.467209 (Hartree/Particle) | H               | 1.811418000000  | -1.645354000000 | -2.626670000000 |                 |                 |
| Thermal correction to Energy=                | 0.492988                    | C               | 2.186605000000  | -2.403666000000 | -0.644379000000 |                 |                 |
| Thermal correction to Enthalpy=              | 0.493932                    | H               | 2.027082000000  | -3.449091000000 | -0.921773000000 |                 |                 |
| Thermal correction to Gibbs Free Energy=     | 0.412770                    | H               | 3.263514000000  | -2.212394000000 | -0.680621000000 |                 |                 |
| Sum of electronic and zero-point Energies=   | -1339.826061                | C               | 1.606041000000  | -2.152222000000 | 0.746622000000  |                 |                 |
| Sum of electronic and thermal Energies=      | -1339.800282                | C               | -0.660874000000 | -2.174970000000 | -2.885287000000 |                 |                 |
| Sum of electronic and thermal Enthalpies=    | -1339.799338                | C               | -0.570823000000 | -2.469434000000 | -0.411752000000 |                 |                 |
| Sum of electronic and thermal Free Energies= | -1339.880500                | H               | -0.224190000000 | -3.159053000000 | -3.084392000000 |                 |                 |
| E(RwB97XD) =                                 | -1340.51155505              | H               | -1.746449000000 | -2.290586000000 | -2.829048000000 |                 |                 |
| H                                            | -0.642006000000             | -0.388908000000 | 0.797304000000  | H               | -0.433500000000 | -1.517019000000 | -3.729401000000 |
| C                                            | 0.158319000000              | -2.591498000000 | 0.702876000000  | H               | 2.107694000000  | -2.766652000000 | 1.501968000000  |
| C                                            | -0.217929000000             | 0.305737000000  | 0.077742000000  | C               | 1.828916000000  | -0.657839000000 | 1.162997000000  |
| C                                            | -1.034320000000             | 1.571698000000  | 0.167971000000  | C               | 1.199546000000  | -0.361672000000 | 2.527998000000  |
| C                                            | -0.529678000000             | -0.124809000000 | -1.359752000000 | C               | 3.336640000000  | -0.378340000000 | 1.284171000000  |
| N                                            | 1.271628000000              | 0.301601000000  | 0.146825000000  | H               | 1.731286000000  | -0.929967000000 | 3.295741000000  |
| C                                            | -1.022254000000             | 2.628729000000  | 1.056652000000  | H               | 1.300445000000  | 0.704104000000  | 2.755885000000  |
| C                                            | -2.050309000000             | 1.455761000000  | -0.792576000000 | H               | 0.148757000000  | -0.641798000000 | 2.594797000000  |
| H                                            | -0.232626000000             | 2.718444000000  | 1.793938000000  | H               | 3.501472000000  | 0.584187000000  | 1.773060000000  |
| C                                            | -2.039476000000             | 3.582744000000  | 0.984511000000  | H               | 3.805278000000  | -1.155396000000 | 1.894459000000  |
| C                                            | -3.058109000000             | 3.452713000000  | 0.046325000000  | H               | 3.845626000000  | -0.344132000000 | 0.320940000000  |
| H                                            | -2.039226000000             | 4.424362000000  | 1.669038000000  | O               | -0.328306000000 | -3.074319000000 | 1.866558000000  |
| C                                            | -3.072251000000             | 2.388127000000  | -0.854844000000 | H               | -1.264542000000 | -2.735133000000 | 1.942209000000  |
| H                                            | -3.850256000000             | 4.193874000000  | 0.008289000000  | H               | -1.615998000000 | -2.759214000000 | -0.396483000000 |
| H                                            | -3.858930000000             | 2.285505000000  | -1.593624000000 | O               | -2.555818000000 | -1.714270000000 | 2.079639000000  |
| N                                            | -1.891563000000             | 0.321838000000  | -1.640254000000 | C               | -3.387238000000 | -1.213699000000 | 1.279262000000  |
| H                                            | -2.567354000000             | -0.392061000000 | -1.344647000000 | O               | -3.527590000000 | -1.433096000000 | 0.061693000000  |
| C                                            | 0.583984000000              | 0.656294000000  | -2.082618000000 | H               | -4.084445000000 | -0.469638000000 | 1.735731000000  |
| C                                            | -0.112409000000             | -1.622933000000 | -1.568294000000 | H               | 1.821038000000  | 1.665314000000  | 0.443539000000  |
| H                                            | 0.508241000000              | 1.736832000000  | -1.947343000000 | O               | 2.173621000000  | 2.646953000000  | 0.709332000000  |
| H                                            | 0.656275000000              | 0.429037000000  | -3.147214000000 | O               | 3.855304000000  | 2.404056000000  | -0.771585000000 |
| C                                            | 1.690716000000              | 0.005478000000  | -1.272096000000 | C               | 3.235811000000  | 3.029720000000  | 0.061429000000  |
| C                                            | 1.460544000000              | -1.476313000000 | -1.603062000000 | H               | 3.543303000000  | 4.046237000000  | 0.365183000000  |
| H                                            | 2.701245000000              | 0.372203000000  | -1.445328000000 | -----           |                 |                 |                 |

**M (HCO<sub>2</sub>H)**

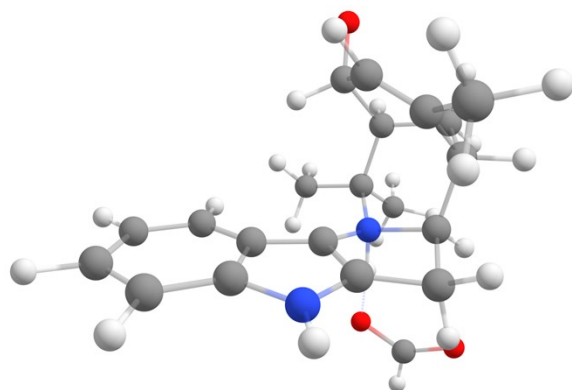

Zero-point correction= 0.429061 (Hartree/Particle)  
 Thermal correction to Energy= 0.452238  
 Thermal correction to Enthalpy= 0.453183  
 Thermal correction to Gibbs Free Energy= 0.376914  
 Sum of electronic and zero-point Energies= -1149.986664  
 Sum of electronic and thermal Energies= -1149.963487  
 Sum of electronic and thermal Enthalpies= -1149.962542  
 Sum of electronic and thermal Free Energies= -1150.038811

E(RwB97XD) = -1150.60516265

|   |              |              |              |
|---|--------------|--------------|--------------|
| H | -0.064877000 | -2.253858000 | 1.499918000  |
| C | 0.863229000  | -2.563932000 | 0.942729000  |
| C | -0.688905000 | 0.434671000  | -0.115735000 |
| C | -2.006544000 | 0.208259000  | 0.415308000  |
| C | -0.805328000 | 0.671037000  | -1.441969000 |
| N | 0.702213000  | 0.689792000  | 0.279091000  |
| C | -2.612238000 | -0.039230000 | 1.656720000  |
| C | -2.864497000 | 0.280299000  | -0.721194000 |
| H | -2.026726000 | -0.078153000 | 2.561281000  |
| C | -3.979320000 | -0.230330000 | 1.732190000  |
| C | -4.792632000 | -0.182397000 | 0.591517000  |
| H | -4.430272000 | -0.425097000 | 2.698931000  |
| C | -4.239673000 | 0.077046000  | -0.647940000 |
| H | -5.860927000 | -0.344876000 | 0.682158000  |

|   |              |              |              |
|---|--------------|--------------|--------------|
| H | -4.854670000 | 0.128040000  | -1.540500000 |
| N | -2.107309000 | 0.585667000  | -1.833155000 |
| H | -2.445765000 | 0.628978000  | -2.776709000 |
| C | 0.469350000  | 1.045261000  | -2.102635000 |
| C | 0.876895000  | -1.940312000 | -1.534512000 |
| H | 0.558917000  | 2.130568000  | -2.211570000 |
| H | 0.647274000  | 0.570831000  | -3.068817000 |
| C | 1.466378000  | 0.542994000  | -1.043306000 |
| C | 1.958593000  | -0.897671000 | -1.287208000 |
| H | 2.307695000  | 1.232142000  | -0.981561000 |
| H | 2.582597000  | -0.820816000 | -2.188678000 |
| C | 2.814917000  | -1.357708000 | -0.104941000 |
| H | 3.176910000  | -2.372662000 | -0.283915000 |
| H | 3.685099000  | -0.705032000 | 0.023610000  |
| C | 1.912531000  | -1.390504000 | 1.123573000  |
| C | 0.432170000  | -2.196344000 | -2.952597000 |
| C | 0.411334000  | -2.652672000 | -0.507992000 |
| H | 1.289876000  | -2.293835000 | -3.631468000 |
| H | -0.147667000 | -3.121219000 | -3.006705000 |
| H | -0.200445000 | -1.393662000 | -3.352950000 |
| H | 2.484053000  | -1.717037000 | 1.997058000  |
| C | 1.417560000  | 0.031872000  | 1.460354000  |
| C | 0.511810000  | 0.051169000  | 2.686525000  |
| C | 2.601935000  | 0.967553000  | 1.782830000  |
| H | 1.132758000  | -0.128297000 | 3.567146000  |
| H | 0.028614000  | 1.026176000  | 2.801821000  |
| H | -0.228477000 | -0.742459000 | 2.647678000  |
| H | 2.240332000  | 1.915473000  | 2.186481000  |
| H | 3.228686000  | 0.475212000  | 2.529524000  |
| H | 3.225997000  | 1.197195000  | 0.920182000  |
| O | 1.371388000  | -3.733411000 | 1.347997000  |
| H | -0.303745000 | -3.454184000 | -0.686662000 |
| H | 0.710633000  | 1.767071000  | 0.495714000  |



|   |             |             |              |
|---|-------------|-------------|--------------|
| O | 0.594865000 | 3.242082000 | 0.788973000  |
| O | 2.000784000 | 3.687980000 | -0.907230000 |
| C | 1.279395000 | 4.005958000 | 0.044467000  |
| H | 1.201735000 | 5.087967000 | 0.301445000  |

-----

**TS<sub>MN</sub> (HCO<sub>2</sub>H)**

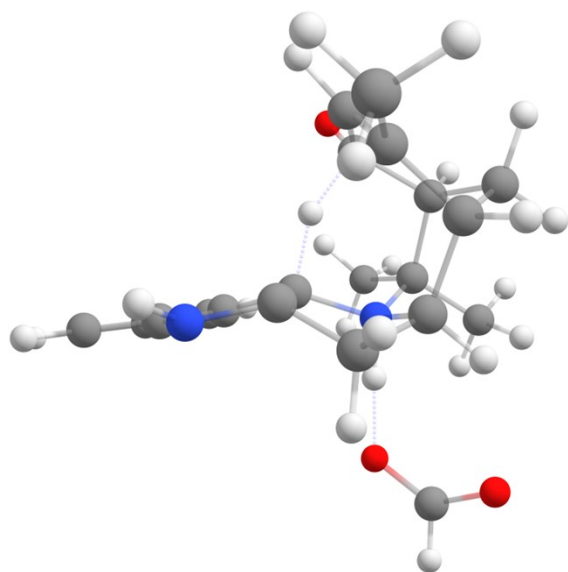

|                                              |                             |
|----------------------------------------------|-----------------------------|
| Zero-point correction=                       | 0.425080 (Hartree/Particle) |
| Thermal correction to Energy=                | 0.447199                    |
| Thermal correction to Enthalpy=              | 0.448144                    |
| Thermal correction to Gibbs Free Energy=     | 0.375818                    |
| Sum of electronic and zero-point Energies=   | -1149.960312                |
| Sum of electronic and thermal Energies=      | -1149.938192                |
| Sum of electronic and thermal Enthalpies=    | -1149.937248                |
| Sum of electronic and thermal Free Energies= | -1150.009574                |

E(RwB97XD) = -1150.57366644

|   |              |              |              |
|---|--------------|--------------|--------------|
| H | -0.187892000 | -1.162118000 | 0.768427000  |
| C | 0.705263000  | -1.912736000 | 1.448232000  |
| C | -0.606620000 | -0.110524000 | -0.129488000 |
| C | -2.031980000 | 0.126503000  | 0.199182000  |
| C | -0.581518000 | -0.458444000 | -1.488469000 |
| N | 0.621545000  | 0.709533000  | 0.111725000  |

|   |              |              |              |
|---|--------------|--------------|--------------|
| C | -2.751368000 | 0.541762000  | 1.318233000  |
| C | -2.759327000 | -0.299274000 | -0.938872000 |
| H | -2.245628000 | 0.885530000  | 2.207058000  |
| C | -4.139952000 | 0.508526000  | 1.303358000  |
| C | -4.834338000 | 0.036798000  | 0.186689000  |
| H | -4.688998000 | 0.838468000  | 2.178315000  |
| C | -4.150251000 | -0.378942000 | -0.944013000 |
| H | -5.918965000 | 0.003776000  | 0.199742000  |
| H | -4.680060000 | -0.730152000 | -1.823743000 |
| N | -1.891362000 | -0.578681000 | -1.972131000 |
| H | -2.141362000 | -1.225675000 | -2.701461000 |
| C | 0.560354000  | 0.180227000  | -2.206001000 |
| C | 1.396251000  | -2.290667000 | -0.898974000 |
| H | 0.288306000  | 1.173474000  | -2.588488000 |
| H | 0.999813000  | -0.391928000 | -3.029531000 |
| C | 1.538712000  | 0.301040000  | -1.047734000 |
| C | 2.270225000  | -1.038932000 | -0.811306000 |
| H | 2.236003000  | 1.127112000  | -1.188306000 |
| H | 3.023561000  | -1.085538000 | -1.607871000 |
| C | 2.951060000  | -1.041547000 | 0.558145000  |
| H | 3.441573000  | -2.004613000 | 0.719375000  |
| H | 3.717310000  | -0.263291000 | 0.621247000  |
| C | 1.848273000  | -0.832782000 | 1.589184000  |
| C | 1.452424000  | -3.099287000 | -2.164599000 |
| C | 0.834062000  | -2.751556000 | 0.236807000  |
| H | 2.474305000  | -3.451795000 | -2.363428000 |
| H | 0.800931000  | -3.974507000 | -2.097069000 |
| H | 1.147957000  | -2.515975000 | -3.041272000 |
| H | 2.227006000  | -0.956559000 | 2.607167000  |
| C | 1.279247000  | 0.591492000  | 1.472665000  |
| C | 0.251706000  | 0.840374000  | 2.571056000  |
| C | 2.343009000  | 1.693855000  | 1.571025000  |
| H | 0.791151000  | 0.962644000  | 3.513886000  |

|   |              |              |              |
|---|--------------|--------------|--------------|
| H | -0.301596000 | 1.762371000  | 2.372055000  |
| H | -0.415658000 | -0.012762000 | 2.696819000  |
| H | 1.859882000  | 2.666319000  | 1.684781000  |
| H | 2.960936000  | 1.499573000  | 2.452338000  |
| H | 2.991212000  | 1.765819000  | 0.699333000  |
| O | 0.205297000  | -2.367959000 | 2.538227000  |
| H | 0.270197000  | -3.681913000 | 0.245677000  |
| H | 0.393837000  | 1.761598000  | -0.062198000 |
| O | 0.125467000  | 3.247671000  | -0.323357000 |
| O | 2.096199000  | 3.412999000  | -1.397145000 |
| C | 1.028061000  | 3.862602000  | -0.964359000 |
| H | 0.809434000  | 4.941566000  | -1.146387000 |

-----

### N (HCO<sub>2</sub>H)

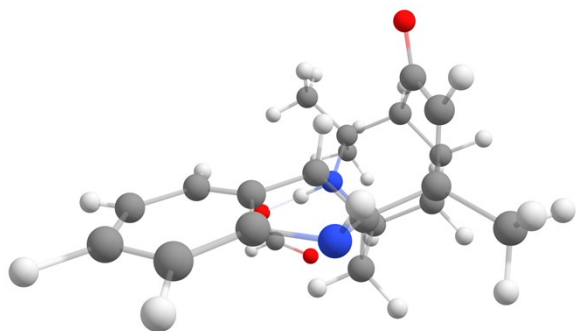

Zero-point correction= 0.431687 (Hartree/Particle)

Thermal correction to Energy= 0.453513

Thermal correction to Enthalpy= 0.454457

Thermal correction to Gibbs Free Energy= 0.382692

Sum of electronic and zero-point Energies= -1150.045414

Sum of electronic and thermal Energies= -1150.023589

Sum of electronic and thermal Enthalpies= -1150.022644

Sum of electronic and thermal Free Energies= -1150.094409

E(RwB97XD) = -1150.66347957

|   |              |              |             |
|---|--------------|--------------|-------------|
| H | -0.009731000 | -0.819559000 | 1.238730000 |
| C | 2.249484000  | -1.356198000 | 1.418238000 |
| C | -0.427432000 | -0.356321000 | 0.348839000 |

|   |              |              |              |
|---|--------------|--------------|--------------|
| C | -1.925022000 | -0.313278000 | 0.477052000  |
| C | -0.251853000 | -1.274910000 | -0.858613000 |
| N | 0.388564000  | 0.847727000  | -0.005316000 |
| C | -2.788082000 | 0.551257000  | 1.121128000  |
| C | -2.398566000 | -1.496543000 | -0.110415000 |
| H | -2.423709000 | 1.489078000  | 1.523298000  |
| C | -4.140088000 | 0.210375000  | 1.201321000  |
| C | -4.601731000 | -0.980728000 | 0.652006000  |
| H | -4.835013000 | 0.883682000  | 1.691002000  |
| C | -3.736242000 | -1.843836000 | -0.021779000 |
| H | -5.654901000 | -1.232718000 | 0.724211000  |
| H | -4.100800000 | -2.752381000 | -0.488599000 |
| N | -1.382148000 | -2.200641000 | -0.817358000 |
| H | -1.132706000 | -3.075747000 | -0.369108000 |
| C | -0.313546000 | -0.230742000 | -1.984275000 |
| C | 1.233324000  | -1.801019000 | -0.875299000 |
| H | -1.251293000 | 0.327417000  | -2.022281000 |
| H | -0.094452000 | -0.641511000 | -2.970271000 |
| C | 0.850646000  | 0.567027000  | -1.430572000 |
| C | 1.960513000  | -0.490239000 | -1.393415000 |
| H | 1.071084000  | 1.516113000  | -1.914245000 |
| H | 2.278772000  | -0.642982000 | -2.430219000 |
| C | 3.140344000  | -0.076230000 | -0.536961000 |
| H | 3.915588000  | -0.845451000 | -0.564336000 |
| H | 3.577578000  | 0.852242000  | -0.921507000 |
| C | 2.626414000  | 0.062501000  | 0.892267000  |
| C | 1.382381000  | -2.937417000 | -1.892985000 |
| C | 1.726803000  | -2.232028000 | 0.479728000  |
| H | 2.444400000  | -3.145336000 | -2.051164000 |
| H | 0.921220000  | -3.856810000 | -1.517292000 |
| H | 0.922600000  | -2.700427000 | -2.858904000 |
| H | 3.420079000  | 0.401254000  | 1.564510000  |
| C | 1.519996000  | 1.148203000  | 0.975671000  |

|   |              |              |              |
|---|--------------|--------------|--------------|
| C | 0.924089000  | 1.247551000  | 2.381306000  |
| C | 2.068107000  | 2.531673000  | 0.596034000  |
| H | 1.674353000  | 1.688440000  | 3.041350000  |
| H | 0.045145000  | 1.899686000  | 2.372508000  |
| H | 0.675187000  | 0.274583000  | 2.803838000  |
| H | 1.315527000  | 3.299961000  | 0.782242000  |
| H | 2.948023000  | 2.737417000  | 1.210441000  |
| H | 2.354726000  | 2.608064000  | -0.452296000 |
| O | 2.500693000  | -1.582502000 | 2.633624000  |
| H | 1.498366000  | -3.246533000 | 0.801194000  |
| H | -0.239451000 | 1.731363000  | -0.039563000 |
| O | -1.127851000 | 2.998019000  | -0.032255000 |
| O | -0.104276000 | 3.584958000  | -1.944727000 |
| C | -0.923369000 | 3.747852000  | -1.035227000 |
| H | -1.571051000 | 4.655053000  | -1.072256000 |

-----

- 
- <sup>1</sup> I. Fernández and F. M. Bickelhaupt, *J. Comput. Chem.*, 2012, **33**, 509.  
<sup>2</sup> M. Ohashi, C. S. Jamieson, Y. Cai, D. Tan, D. Kanayama, M.-C. Tang, S. M. Anthony, J. V. Chari, J. S. Barber, E. Picazo, T. B. Kakule, S. Cao, N. K. Garg, J. Zhou, K. N. Houk and Y. Tang, *Nature*, 2020, **586**, 64.  
<sup>3</sup> F.-G. Klärner, W. Rüngeler and W. Maifeld, *Angew. Chem. Int. Ed. Engl.*, 1981, **20**, 595.  
<sup>4</sup> J.-D. Chai and M. Head-Gordon, *Phys. Chem. Chem. Phys.*, 2008, **10**, 6615.  
<sup>5</sup> (a) R. Krishnan, J. S. Binkley, R. Seeger and J. A. Pople, *J. Chem. Phys.*, 1980, **72**, 650; (b) T. Clark, J. Chandrasekhar, G. W. Spitznagel and P. v. R. Schleyer, *J. Comput. Chem.*, 1983, **4**, 294.  
<sup>6</sup> F. Weigend, F. Furche and R. Ahlrichs, *J. Chem. Phys.*, 2003, **119**, 12753.  
<sup>7</sup> J. Tomasi, B. Mennucci and R. Cammi, *Chem. Rev.*, 2005, **105**, 2999.  
<sup>8</sup> S. M. Schulze, N. Santella, J. J. Grabowski and J. K. Lee, *J. Org. Chem.*, 2001, **66**, 7247.  
<sup>9</sup> G. A. Schmid and H.-J. Borschberg, *Helv. Chim. Acta*, 2001, **84**, 401.  
<sup>10</sup> S. M. Schulze, N. Santella, J. J. Grabowski and J. K. Lee, *J. Org. Chem.*, 2001, **66**, 7247.  
<sup>11</sup> For a discussion, see ref 10.
